# Supplementary material for: TRIM28 repression of retrotransposon-based enhancers is necessary to preserve transcriptional dynamics in embryonic stem cells
Source: HighWire-hosted journal article supplement (doi:10.1101/gr.147678.112), 2012-12-10
Supplement: Supp_Table1.xlsx [file Supp_Table1.xlsx]

## Sheet: DAVID
DAVID Bioinformatics Resource
Described in: Nature Protocols 2009; 4(1):44 & Genome Biology 2003; 4(5):P3
UP genes
4400 DAVID Ids found and used for analysis
GOTERM_BP_FAT
Category	Gene Count	%	P-value	Benjamini adjusted p-value
regulation of RNA metabolic process	381	8.7	0.00016	0.0062
regulation of transcription, DNA-dependent	375	8.5	0.00019	0.0069
intracellular signaling cascade	248	5.6	7.5e-05	0.0032
phosphate metabolic process	222	5	0.0041	0.074
cell adhesion	214	4.9	3e-19	1.3e-15
ion transport	208	4.7	1.9e-06	0.00014
regulation of cell proliferation	187	4.2	2.9e-12	1.8e-09
positive regulation of macromolecule metabolic process	181	4.1	3.7e-05	0.0019
regulation of transcription from RNA polymerase II	177	4	3.4e-05	0.0017
regulation of cell death	166	3.8	1.3e-05	0.00078
protein amino acid phosphorylation	162	3.7	0.022	0.25
establishment of protein localization	158	3.6	0.099	0.62
cation transport	152	3.5	3e-05	0.0016
positive regulation of gene expression	145	3.3	3.2e-05	0.0016
neuron differentiation	143	3.2	1.2e-10	3.7e-08
vesicle-mediated transport	142	3.2	9.6e-06	0.00059
metal ion transport	141	3.2	6.6e-07	6.3e-05
cell motion	140	3.2	1.1e-12	7.8e-10
embryonic development ending in birth or egg hatching	137	3.1	5.1e-07	4.9e-05
chordate embryonic development	136	3.1	4.9e-07	4.9e-05
programmed cell death	136	3.1	0.00028	0.0096
embryonic morphogenesis	135	3.1	9.3e-12	4.5e-09
apoptosis	132	3	0.00062	0.018
response to organic substance	132	3	0.014	0.18
transmembrane transport	131	3	0.00057	0.016
positive regulation of transcription, DNA-dependent	126	2.9	4.3e-05	0.0021
positive regulation of RNA metabolic process	126	2.9	6.1e-05	0.0028
immune response	122	2.8	0.024	0.27
cellular component morphogenesis	119	2.7	1.7e-07	1.9e-05
positive regulation of transcription from RNA polymerase	117	2.7	1.8e-06	0.00014
behavior	117	2.7	0.00064	0.018
skeletal system development	116	2.6	8.1e-13	7.1e-10
cell morphogenesis	113	2.6	3.4e-09	7.1e-07
response to wounding	113	2.6	3.2e-06	0.00023
neuron development	111	2.5	3.6e-10	1e-07
reproductive process in a multicellular organism	110	2.5	0.011	0.15
multicellular organism reproduction	110	2.5	0.011	0.15
vasculature development	109	2.5	2e-14	2.9e-11
epithelium development	108	2.5	2.5e-11	9e-09
blood vessel development	107	2.4	2.2e-14	2.4e-11
tube development	106	2.4	2.3e-11	9e-09
pattern specification process	105	2.4	6.6e-09	1.3e-06
chemical homeostasis	103	2.3	0.0031	0.058
cellular homeostasis	101	2.3	0.00077	0.02
sexual reproduction	101	2.3	0.03	0.31
tissue morphogenesis	100	2.3	3.8e-12	2.1e-09
enzyme linked receptor protein signaling pathway	100	2.3	2.7e-08	3.7e-06
cell motility	100	2.3	2.5e-07	2.6e-05
localization of cell	100	2.3	2.5e-07	2.6e-05
cell projection organization	100	2.3	6.8e-05	0.003
embryonic organ development	97	2.2	1.5e-10	4.3e-08
cell-cell signaling	97	2.2	4.9e-06	0.00033
membrane organization	95	2.2	7.6e-07	6.9e-05
cell migration	94	2.1	1.6e-09	4e-07
positive regulation of cell proliferation	94	2.1	1.1e-05	0.00069
cell-cell adhesion	90	2	1.6e-08	2.5e-06
ion homeostasis	89	2	0.00056	0.016
regulation of phosphate metabolic process	88	2	0.0022	0.044
regulation of phosphorus metabolic process	88	2	0.0022	0.044
heart development	87	2	8.4e-09	1.5e-06
positive regulation of molecular function	87	2	0.0053	0.088
gamete generation	87	2	0.039	0.36
negative regulation of cell proliferation	86	2	2.5e-08	3.5e-06
regulation of phosphorylation	86	2	0.0015	0.034
blood vessel morphogenesis	85	1.9	4.9e-11	1.6e-08
cell morphogenesis involved in differentiation	85	1.9	2.8e-09	6.4e-07
positive regulation of developmental process	85	1.9	4.7e-09	9.4e-07
regulation of growth	83	1.9	8.6e-05	0.0036
lipid biosynthetic process	82	1.9	0.0049	0.084
immune system development	82	1.9	0.012	0.16
sensory organ development	81	1.8	0.00029	0.0098
hemopoietic or lymphoid organ development	81	1.8	0.0049	0.084
neuron projection development	80	1.8	6.9e-07	6.4e-05
cellular chemical homeostasis	79	1.8	0.0029	0.056
reproductive developmental process	78	1.8	0.0029	0.056
gland development	77	1.8	6e-08	7.5e-06
negative regulation of cell death	77	1.8	0.00046	0.014
positive regulation of programmed cell death	77	1.8	0.00088	0.023
positive regulation of cell death	77	1.8	0.0011	0.027
cellular ion homeostasis	77	1.8	0.0032	0.06
in utero embryonic development	77	1.8	0.006	0.097
negative regulation of programmed cell death	76	1.7	0.00067	0.018
cell projection morphogenesis	75	1.7	9.6e-07	8.2e-05
cell part morphogenesis	75	1.7	7.4e-06	0.00046
positive regulation of apoptosis	75	1.7	0.0018	0.039
positive regulation of catalytic activity	75	1.7	0.0073	0.11
cell morphogenesis involved in neuron differentiation	74	1.7	1.6e-08	2.5e-06
transmission of nerve impulse	74	1.7	0.00015	0.0058
negative regulation of apoptosis	74	1.7	0.00096	0.024
locomotory behavior	74	1.7	0.00096	0.024
tube morphogenesis	73	1.7	1.7e-09	4.2e-07
morphogenesis of an epithelium	73	1.7	3.2e-09	7e-07
hemopoiesis	73	1.7	0.006	0.097
regionalization	72	1.6	7.4e-05	0.0032
neuron projection morphogenesis	71	1.6	4.8e-08	6.2e-06
secretion	70	1.6	0.00067	0.018
small GTPase mediated signal transduction	70	1.6	0.034	0.34
positive regulation of cell differentiation	69	1.6	2.1e-07	2.4e-05
muscle organ development	69	1.6	2.7e-07	2.8e-05
membrane invagination	69	1.6	4.3e-06	0.0003
endocytosis	69	1.6	4.3e-06	0.0003
embryonic organ morphogenesis	68	1.5	1.1e-08	2e-06
axonogenesis	68	1.5	2e-08	2.9e-06
inflammatory response	68	1.5	0.003	0.058
regulation of system process	67	1.5	0.00018	0.0067
di-, tri-valent inorganic cation transport	64	1.5	4.4e-07	4.5e-05
transmembrane receptor protein tyrosine kinase signaling	64	1.5	0.00026	0.009
growth	64	1.5	0.00031	0.01
response to endogenous stimulus	63	1.4	0.00013	0.005
negative regulation of transcription from RNA polymerase	63	1.4	0.04	0.37
morphogenesis of a branching structure	62	1.4	2.2e-11	9.4e-09
negative regulation of cell differentiation	62	1.4	0.00017	0.0063
positive regulation of cell communication	62	1.4	0.00053	0.016
protein kinase cascade	62	1.4	0.078	0.55
regulation of transferase activity	61	1.4	0.0036	0.066
positive regulation of immune system process	60	1.4	0.012	0.16
extracellular structure organization	59	1.3	1.5e-06	0.00012
positive regulation of response to stimulus	59	1.3	0.0018	0.039
skeletal system morphogenesis	58	1.3	1.5e-08	2.4e-06
cell fate commitment	58	1.3	2.2e-06	0.00016
synaptic transmission	58	1.3	0.00097	0.024
regulation of kinase activity	58	1.3	0.0063	0.1
glycoprotein metabolic process	57	1.3	5e-06	0.00032
regulation of cell development	57	1.3	6.9e-05	0.003
negative regulation of cell communication	57	1.3	0.0049	0.084
response to hormone stimulus	56	1.3	0.0004	0.013
actin filament-based process	56	1.3	0.0022	0.045
cation homeostasis	56	1.3	0.0062	0.1
regulation of protein kinase activity	56	1.3	0.0079	0.12
negative regulation of signal transduction	55	1.2	0.0018	0.039
positive regulation of signal transduction	55	1.2	0.0021	0.044
positive regulation of multicellular organismal process	54	1.2	0.00098	0.024
fatty acid metabolic process	54	1.2	0.015	0.19
angiogenesis	53	1.2	4.5e-06	0.0003
actin cytoskeleton organization	53	1.2	0.0023	0.047
dephosphorylation	52	1.2	6.5e-05	0.0029
secretion by cell	52	1.2	0.041	0.37
urogenital system development	51	1.2	0.00035	0.012
anterior/posterior pattern formation	51	1.2	0.0012	0.028
muscle tissue development	50	1.1	0.0001	0.004
regulation of nervous system development	50	1.1	0.00096	0.024
regulation of locomotion	49	1.1	2.4e-07	2.6e-05
calcium ion transport	49	1.1	6.4e-06	0.00041
reproductive cellular process	49	1.1	0.038	0.36
epithelial cell differentiation	48	1.1	2.5e-05	0.0014
di-, tri-valent inorganic cation homeostasis	48	1.1	0.0023	0.046
forebrain development	48	1.1	0.032	0.32
induction of programmed cell death	48	1.1	0.032	0.32
induction of apoptosis	48	1.1	0.032	0.32
bone development	47	1.1	1.7e-05	0.00095
striated muscle tissue development	47	1.1	0.00014	0.0054
regulation of neurogenesis	47	1.1	0.00039	0.012
regulation of cell motion	46	1	1.9e-06	0.00014
muscle cell differentiation	46	1	3.1e-05	0.0016
homophilic cell adhesion	46	1	3.1e-05	0.0016
limb development	46	1	5e-05	0.0024
appendage development	46	1	5e-05	0.0024
cellular cation homeostasis	46	1	0.015	0.19
regulation of leukocyte activation	46	1	0.019	0.22
regulation of cell activation	46	1	0.023	0.26
regulation of cellular component size	46	1	0.039	0.36
extracellular matrix organization	45	1	7.9e-07	7e-05
appendage morphogenesis	45	1	4.4e-05	0.0021
limb morphogenesis	45	1	4.4e-05	0.0021
glycoprotein biosynthetic process	45	1	7.1e-05	0.0031
lipid localization	45	1	0.00071	0.019
Wnt receptor signaling pathway	45	1	0.001	0.025
ectoderm development	45	1	0.0017	0.038
eye development	45	1	0.039	0.36
regulation of cellular localization	45	1	0.057	0.46
branching morphogenesis of a tube	44	1	1.4e-07	1.7e-05
axon guidance	44	1	8.3e-07	7.2e-05
respiratory system development	44	1	0.00066	0.018
gland morphogenesis	43	1	1.1e-08	1.9e-06
ossification	43	1	2.5e-05	0.0013
epidermis development	43	1	0.0015	0.034
positive regulation of transport	43	1	0.0048	0.083
cellular amino acid derivative metabolic process	43	1	0.016	0.2
circulatory system process	42	1	0.00019	0.0069
blood circulation	42	1	0.00019	0.0069
second-messenger-mediated signaling	42	1	0.00083	0.022
cellular di-, tri-valent inorganic cation homeostasis	42	1	0.011	0.15
regulation of lymphocyte activation	42	1	0.036	0.35
leukocyte differentiation	41	0.9	0.044	0.39
cartilage development	40	0.9	3.7e-08	4.9e-06
regulation of cell migration	40	0.9	7.3e-06	0.00046
regulation of cell adhesion	40	0.9	1.4e-05	0.0008
regulation of response to external stimulus	40	0.9	0.00015	0.0058
epithelial tube morphogenesis	40	0.9	0.00086	0.022
respiratory tube development	40	0.9	0.0013	0.029
protein amino acid dephosphorylation	40	0.9	0.0015	0.034
lipid transport	40	0.9	0.0037	0.067
positive regulation of immune response	40	0.9	0.036	0.35
embryonic skeletal system development	39	0.9	9.9e-07	8.3e-05
lung development	39	0.9	0.0017	0.038
positive regulation of cellular component organization	39	0.9	0.01	0.14
reproductive structure development	39	0.9	0.029	0.3
positive regulation of transferase activity	39	0.9	0.049	0.42
embryonic appendage morphogenesis	38	0.9	0.00018	0.0067
embryonic limb morphogenesis	38	0.9	0.00018	0.0067
developmental maturation	38	0.9	0.00047	0.014
wound healing	38	0.9	0.0039	0.071
ear development	37	0.8	0.0018	0.039
metal ion homeostasis	37	0.8	0.0026	0.052
anion transport	37	0.8	0.067	0.5
response to protein stimulus	36	0.8	7.9e-05	0.0033
glycosylation	36	0.8	0.00023	0.008
protein amino acid glycosylation	36	0.8	0.00023	0.008
biopolymer glycosylation	36	0.8	0.00023	0.008
protein maturation	36	0.8	0.00073	0.019
regulation of neuron differentiation	36	0.8	0.0025	0.049
kidney development	36	0.8	0.0059	0.097
regulation of cell size	36	0.8	0.0069	0.11
MAPKKK cascade	36	0.8	0.017	0.21
regulation of membrane potential	36	0.8	0.032	0.32
regulation of secretion	36	0.8	0.061	0.48
sodium ion transport	36	0.8	0.061	0.48
camera-type eye development	36	0.8	0.097	0.62
sex differentiation	36	0.8	0.097	0.62
positive regulation of kinase activity	36	0.8	0.097	0.62
heart morphogenesis	35	0.8	3.3e-06	0.00023
regulation of cell growth	35	0.8	0.00065	0.018
calcium ion homeostasis	35	0.8	0.0013	0.029
embryonic skeletal system morphogenesis	34	0.8	1.6e-07	1.9e-05
antigen processing and presentation	34	0.8	0.00045	0.014
protein processing	34	0.8	0.00091	0.023
polysaccharide metabolic process	34	0.8	0.0014	0.032
developmental growth	34	0.8	0.0063	0.1
regulation of neurological system process	34	0.8	0.04	0.37
regulation of protein amino acid phosphorylation	34	0.8	0.091	0.6
mammary gland development	33	0.8	0.00081	0.021
cellular metal ion homeostasis	33	0.8	0.012	0.16
chromatin assembly or disassembly	33	0.8	0.04	0.37
cellular calcium ion homeostasis	32	0.7	0.0048	0.083
regulation of synaptic transmission	32	0.7	0.02	0.24
regulation of transmission of nerve impulse	32	0.7	0.05	0.42
regulation of T cell activation	32	0.7	0.056	0.45
taxis	32	0.7	0.062	0.48
chemotaxis	32	0.7	0.062	0.48
anti-apoptosis	31	0.7	0.0054	0.089
inner ear development	31	0.7	0.0054	0.089
response to peptide hormone stimulus	31	0.7	0.017	0.21
regulation of cell morphogenesis	31	0.7	0.023	0.26
female pregnancy	30	0.7	9.3e-05	0.0038
regulation of vesicle-mediated transport	30	0.7	0.0041	0.074
positive regulation of leukocyte activation	30	0.7	0.049	0.42
negative regulation of multicellular organismal process	30	0.7	0.056	0.45
positive regulation of cell activation	30	0.7	0.062	0.48
morphogenesis of embryonic epithelium	29	0.7	0.0031	0.058
inorganic anion transport	29	0.7	0.0082	0.12
regulation of body fluid levels	29	0.7	0.022	0.25
striated muscle cell differentiation	29	0.7	0.022	0.25
learning or memory	29	0.7	0.022	0.25
carboxylic acid transport	29	0.7	0.078	0.55
organic acid transport	29	0.7	0.086	0.58
negative regulation of catalytic activity	29	0.7	0.096	0.61
protein maturation by peptide bond cleavage	28	0.6	0.00027	0.0092
regulation of nucleotide metabolic process	28	0.6	0.0034	0.064
ear morphogenesis	28	0.6	0.0043	0.076
regulation of MAP kinase activity	28	0.6	0.018	0.22
response to oxidative stress	28	0.6	0.029	0.3
post-embryonic development	28	0.6	0.029	0.3
positive regulation of lymphocyte activation	28	0.6	0.07	0.52
cardiac muscle tissue development	27	0.6	5.4e-05	0.0025
cyclic-nucleotide-mediated signaling	27	0.6	0.00091	0.023
eye morphogenesis	27	0.6	0.0048	0.083
regulation of cyclic nucleotide metabolic process	27	0.6	0.0048	0.083
cell maturation	27	0.6	0.0072	0.11
carbohydrate biosynthetic process	27	0.6	0.028	0.3
neural tube development	27	0.6	0.028	0.3
phospholipid biosynthetic process	27	0.6	0.028	0.3
cAMP-mediated signaling	26	0.6	0.00057	0.017
regulation of nucleotide biosynthetic process	26	0.6	0.0054	0.089
regulation of cyclic nucleotide biosynthetic process	26	0.6	0.0054	0.089
endocrine system development	26	0.6	0.0081	0.12
integrin-mediated signaling pathway	26	0.6	0.017	0.21
biogenic amine metabolic process	26	0.6	0.032	0.32
adaptive immune response	26	0.6	0.055	0.45
positive regulation of protein kinase cascade	26	0.6	0.088	0.58
regulation of inflammatory response	25	0.6	0.00046	0.014
G-protein signaling, coupled to cyclic nucleotide second	25	0.6	0.0011	0.027
regulation of blood pressure	25	0.6	0.0039	0.07
regulation of cAMP metabolic process	25	0.6	0.0061	0.098
inner ear morphogenesis	25	0.6	0.0061	0.098
transition metal ion transport	25	0.6	0.011	0.15
multicellular organismal homeostasis	25	0.6	0.013	0.17
negative regulation of immune system process	25	0.6	0.031	0.32
neurotransmitter transport	25	0.6	0.054	0.45
acute inflammatory response	25	0.6	0.062	0.48
regulation of leukocyte proliferation	25	0.6	0.07	0.52
exocrine system development	24	0.5	1.8e-06	0.00014
G-protein signaling, coupled to cAMP nucleotide second	24	0.5	0.00067	0.018
cell-substrate adhesion	24	0.5	0.0012	0.028
response to steroid hormone stimulus	24	0.5	0.0027	0.053
regulation of cAMP biosynthetic process	24	0.5	0.0084	0.12
neuron migration	24	0.5	0.021	0.25
nucleosome assembly	24	0.5	0.035	0.34
gastrulation	24	0.5	0.04	0.37
chromatin assembly	24	0.5	0.047	0.41
nucleosome organization	24	0.5	0.054	0.44
protein-DNA complex assembly	24	0.5	0.054	0.44
regulation of lymphocyte proliferation	24	0.5	0.088	0.58
regulation of mononuclear cell proliferation	24	0.5	0.088	0.58
regulation of neuron apoptosis	24	0.5	0.088	0.58
mesenchyme development	23	0.5	0.00037	0.012
vascular process in circulatory system	23	0.5	0.00037	0.012
gliogenesis	23	0.5	0.00072	0.019
cytokine-mediated signaling pathway	23	0.5	0.0023	0.046
chloride transport	23	0.5	0.0077	0.12
regulation of cyclase activity	23	0.5	0.0095	0.14
regulation of lyase activity	23	0.5	0.0095	0.14
skeletal muscle organ development	23	0.5	0.069	0.51
antigen processing and presentation of peptide antigen	22	0.5	1.1e-06	9.3e-05
tissue remodeling	22	0.5	0.00039	0.012
mesenchymal cell differentiation	22	0.5	0.00077	0.02
response to unfolded protein	22	0.5	0.0033	0.061
regulation of cell projection organization	22	0.5	0.0069	0.11
regulation of lipid metabolic process	22	0.5	0.0086	0.13
regulation of lymphocyte differentiation	22	0.5	0.0086	0.13
regulation of adenylate cyclase activity	22	0.5	0.013	0.17
regulation of epithelial cell proliferation	22	0.5	0.023	0.26
negative regulation of response to stimulus	22	0.5	0.033	0.33
vasculogenesis	21	0.5	0.00028	0.0094
mesenchymal cell development	21	0.5	0.0011	0.027
regulation of blood vessel size	21	0.5	0.0016	0.034
regulation of tube size	21	0.5	0.0016	0.034
cell-matrix adhesion	21	0.5	0.0028	0.055
aminoglycan metabolic process	21	0.5	0.0047	0.083
Notch signaling pathway	21	0.5	0.0077	0.12
positive regulation of growth	21	0.5	0.012	0.16
actin filament organization	21	0.5	0.012	0.16
tube lumen formation	21	0.5	0.022	0.25
cell fate specification	21	0.5	0.022	0.25
carbohydrate transport	21	0.5	0.026	0.29
regulation of neurotransmitter levels	21	0.5	0.037	0.35
dorsal/ventral pattern formation	21	0.5	0.051	0.43
positive regulation of T cell activation	21	0.5	0.068	0.51
regulation of developmental growth	20	0.5	7.4e-05	0.0032
positive regulation of locomotion	20	0.5	0.0012	0.028
regulation of heart contraction	20	0.5	0.0068	0.11
regulation of cell morphogenesis involved in	20	0.5	0.0068	0.11
negative regulation of protein kinase activity	20	0.5	0.0086	0.13
negative regulation of kinase activity	20	0.5	0.0086	0.13
regulation of endocytosis	20	0.5	0.011	0.15
negative regulation of transferase activity	20	0.5	0.014	0.18
regulation of ossification	20	0.5	0.014	0.18
learning	20	0.5	0.03	0.31
metanephros development	20	0.5	0.036	0.35
neuromuscular process	20	0.5	0.049	0.42
membrane lipid metabolic process	20	0.5	0.088	0.58
positive regulation of response to external stimulus	19	0.4	0.00062	0.018
central nervous system neuron differentiation	19	0.4	0.0018	0.038
heterocycle catabolic process	19	0.4	0.0058	0.096
neuron fate commitment	19	0.4	0.0076	0.11
regulation of neuron projection development	19	0.4	0.0076	0.11
glial cell differentiation	19	0.4	0.0097	0.14
regulation of T cell differentiation	19	0.4	0.0097	0.14
phagocytosis	19	0.4	0.012	0.16
hair cycle	19	0.4	0.023	0.26
molting cycle	19	0.4	0.023	0.26
embryonic epithelial tube formation	19	0.4	0.034	0.34
positive regulation of defense response	19	0.4	0.056	0.45
regulation of axonogenesis	18	0.4	0.0019	0.04
activation of adenylate cyclase activity	18	0.4	0.0036	0.066
positive regulation of lyase activity	18	0.4	0.0049	0.084
positive regulation of adenylate cyclase activity	18	0.4	0.0049	0.084
positive regulation of cyclase activity	18	0.4	0.0049	0.084
regulation of striated muscle tissue development	18	0.4	0.0049	0.084
regulation of muscle development	18	0.4	0.0065	0.1
regulation of angiogenesis	18	0.4	0.011	0.15
osteoblast differentiation	18	0.4	0.017	0.21
regulation of synaptic plasticity	18	0.4	0.021	0.25
transforming growth factor beta receptor signaling	18	0.4	0.021	0.25
camera-type eye morphogenesis	18	0.4	0.021	0.25
molting cycle process	18	0.4	0.032	0.32
hair follicle development	18	0.4	0.032	0.32
hair cycle process	18	0.4	0.032	0.32
neural tube formation	18	0.4	0.039	0.36
cellular hormone metabolic process	18	0.4	0.046	0.4
regulation of action potential	18	0.4	0.064	0.49
male sex differentiation	18	0.4	0.099	0.62
cell cycle arrest	18	0.4	0.099	0.62
antigen processing and presentation of exogenous antigen	17	0.4	5.1e-05	0.0024
negative regulation of locomotion	17	0.4	0.00025	0.0089
salivary gland development	17	0.4	0.00025	0.0089
negative regulation of cell motion	17	0.4	0.00041	0.013
cell growth	17	0.4	0.0028	0.055
pancreas development	17	0.4	0.0028	0.055
prostate gland development	17	0.4	0.0053	0.089
regulation of cell-substrate adhesion	17	0.4	0.0071	0.11
positive regulation of cell motion	17	0.4	0.0094	0.13
regulation of muscle contraction	17	0.4	0.0094	0.13
ameboidal cell migration	17	0.4	0.024	0.27
positive regulation of cell development	17	0.4	0.036	0.35
tissue homeostasis	17	0.4	0.062	0.48
regulation of myeloid cell differentiation	17	0.4	0.073	0.53
interphase	17	0.4	0.073	0.53
negative regulation of lymphocyte activation	17	0.4	0.085	0.57
positive regulation of leukocyte proliferation	17	0.4	0.085	0.57
positive regulation of secretion	17	0.4	0.098	0.62
negative regulation of leukocyte activation	17	0.4	0.098	0.62
negative regulation of cell activation	17	0.4	0.098	0.62
female gonad development	17	0.4	0.098	0.62
collagen fibril organization	16	0.4	1.6e-06	0.00013
salivary gland morphogenesis	16	0.4	0.00014	0.0053
regulation of organ growth	16	0.4	0.0021	0.044
neural crest cell differentiation	16	0.4	0.0021	0.044
neural crest cell development	16	0.4	0.0021	0.044
positive regulation of cell migration	16	0.4	0.0078	0.12
neural tube closure	16	0.4	0.014	0.18
tube closure	16	0.4	0.014	0.18
negative regulation of cell development	16	0.4	0.017	0.21
primary neural tube formation	16	0.4	0.028	0.3
ureteric bud development	16	0.4	0.028	0.3
negative regulation of cell cycle	16	0.4	0.034	0.34
spinal cord development	16	0.4	0.06	0.47
positive regulation of MAPKKK cascade	16	0.4	0.071	0.52
organic ether metabolic process	16	0.4	0.083	0.57
antigen processing and presentation of exogenous peptide	15	0.3	5.8e-05	0.0027
negative regulation of cell migration	15	0.3	0.00093	0.023
cardiac cell differentiation	15	0.3	0.0063	0.1
mammary gland morphogenesis	15	0.3	0.0063	0.1
positive regulation of endocytosis	15	0.3	0.0086	0.13
icosanoid metabolic process	15	0.3	0.0086	0.13
palate development	15	0.3	0.012	0.16
unsaturated fatty acid metabolic process	15	0.3	0.015	0.19
cyclic nucleotide metabolic process	15	0.3	0.015	0.19
cytosolic calcium ion homeostasis	15	0.3	0.025	0.27
negative regulation of neurogenesis	15	0.3	0.025	0.27
gut development	15	0.3	0.031	0.32
positive regulation of neurogenesis	15	0.3	0.047	0.41
response to organic cyclic substance	15	0.3	0.057	0.46
nitrogen compound catabolic process	15	0.3	0.057	0.46
positive regulation of cell adhesion	15	0.3	0.068	0.51
regulation of action potential in neuron	15	0.3	0.095	0.61
neutral lipid metabolic process	15	0.3	0.095	0.61
odontogenesis	15	0.3	0.095	0.61
regulation of mesenchymal cell proliferation	14	0.3	0.0003	0.01
renal system process	14	0.3	0.00053	0.016
embryonic cranial skeleton morphogenesis	14	0.3	0.00053	0.016
BMP signaling pathway	14	0.3	0.00053	0.016
negative regulation of cell adhesion	14	0.3	0.00088	0.022
prostate gland epithelium morphogenesis	14	0.3	0.0014	0.032
prostate gland morphogenesis	14	0.3	0.0022	0.045
regulation of lipase activity	14	0.3	0.013	0.17
positive regulation of T cell differentiation	14	0.3	0.013	0.17
response to estrogen stimulus	14	0.3	0.017	0.21
proteoglycan metabolic process	14	0.3	0.017	0.21
digestive system development	14	0.3	0.022	0.25
positive regulation of lymphocyte differentiation	14	0.3	0.022	0.25
biomineral formation	14	0.3	0.028	0.3
elevation of cytosolic calcium ion concentration	14	0.3	0.035	0.35
complement activation	14	0.3	0.035	0.35
myelination	14	0.3	0.044	0.39
peptide metabolic process	14	0.3	0.054	0.45
ensheathment of neurons	14	0.3	0.065	0.5
axon ensheathment	14	0.3	0.065	0.5
formation of primary germ layer	14	0.3	0.078	0.55
glycosaminoglycan metabolic process	14	0.3	0.078	0.55
phosphoinositide-mediated signaling	14	0.3	0.078	0.55
positive regulation of mesenchymal cell proliferation	13	0.3	0.0008	0.021
regeneration	13	0.3	0.0013	0.031
bone morphogenesis	13	0.3	0.005	0.084
positive regulation of lipase activity	13	0.3	0.0072	0.11
regulation of phospholipase activity	13	0.3	0.01	0.14
polysaccharide biosynthetic process	13	0.3	0.019	0.22
vesicle organization	13	0.3	0.025	0.27
response to cytokine stimulus	13	0.3	0.032	0.32
digestive tract morphogenesis	13	0.3	0.04	0.37
neuromuscular process controlling balance	13	0.3	0.05	0.43
mesoderm formation	13	0.3	0.075	0.54
membrane depolarization	13	0.3	0.075	0.54
negative regulation of response to external stimulus	13	0.3	0.075	0.54
antigen processing and presentation of peptide antigen	12	0.3	0.00017	0.0064
cardiac muscle tissue morphogenesis	12	0.3	0.00036	0.012
muscle tissue morphogenesis	12	0.3	0.00036	0.012
branching involved in salivary gland morphogenesis	12	0.3	0.00036	0.012
excretion	12	0.3	0.002	0.043
organ growth	12	0.3	0.0033	0.062
positive regulation of inflammatory response	12	0.3	0.0076	0.12
activation of phospholipase C activity	12	0.3	0.015	0.19
positive regulation of phospholipase C activity	12	0.3	0.015	0.19
positive regulation of phospholipase activity	12	0.3	0.015	0.19
cyclic nucleotide biosynthetic process	12	0.3	0.015	0.19
G1/S transition of mitotic cell cycle	12	0.3	0.028	0.3
catecholamine metabolic process	12	0.3	0.046	0.4
complement activation, classical pathway	12	0.3	0.046	0.4
catechol metabolic process	12	0.3	0.046	0.4
diol metabolic process	12	0.3	0.046	0.4
phenol metabolic process	12	0.3	0.046	0.4
positive regulation of epithelial cell proliferation	12	0.3	0.057	0.46
regulation of B cell proliferation	12	0.3	0.071	0.52
iron ion transport	12	0.3	0.071	0.52
central nervous system neuron development	12	0.3	0.086	0.58
vascular endothelial growth factor receptor signaling	11	0.2	0.0001	0.004
endochondral bone morphogenesis	11	0.2	0.005	0.085
Wnt receptor signaling pathway, calcium modulating	11	0.2	0.005	0.085
receptor-mediated endocytosis	11	0.2	0.0078	0.12
blood vessel remodeling	11	0.2	0.012	0.16
nerve development	11	0.2	0.023	0.26
respiratory gaseous exchange	11	0.2	0.031	0.32
regulation of smooth muscle contraction	11	0.2	0.031	0.32
mammary gland duct morphogenesis	11	0.2	0.04	0.37
cell fate determination	11	0.2	0.052	0.43
regulation of tumor necrosis factor production	11	0.2	0.052	0.43
regulation of systemic arterial blood pressure	11	0.2	0.066	0.5
cardiac muscle cell differentiation	11	0.2	0.066	0.5
visual learning	11	0.2	0.081	0.56
response to alkaloid	11	0.2	0.099	0.62
skin development	11	0.2	0.099	0.62
peripheral nervous system development	11	0.2	0.099	0.62
ventricular cardiac muscle morphogenesis	10	0.2	0.0015	0.034
chondrocyte differentiation	10	0.2	0.025	0.27
regulation of smoothened signaling pathway	10	0.2	0.034	0.34
regulation of steroid metabolic process	10	0.2	0.034	0.34
embryonic forelimb morphogenesis	10	0.2	0.034	0.34
heterophilic cell adhesion	10	0.2	0.034	0.34
glycerol metabolic process	10	0.2	0.046	0.4
neural crest cell migration	10	0.2	0.046	0.4
positive regulation of myeloid cell differentiation	10	0.2	0.075	0.54
regulation of postsynaptic membrane potential	10	0.2	0.075	0.54
alditol metabolic process	10	0.2	0.075	0.54
epithelial cell proliferation	10	0.2	0.094	0.61
neuron maturation	9	0.2	0.0023	0.046
artery morphogenesis	9	0.2	0.0043	0.075
endocrine pancreas development	9	0.2	0.012	0.16
embryonic heart tube development	9	0.2	0.012	0.16
endochondral ossification	9	0.2	0.012	0.16
monocarboxylic acid transport	9	0.2	0.038	0.36
neuron fate specification	9	0.2	0.038	0.36
acyl-CoA metabolic process	9	0.2	0.051	0.43
embryo implantation	9	0.2	0.051	0.43
regulation of smooth muscle cell proliferation	9	0.2	0.051	0.43
cellular polysaccharide biosynthetic process	9	0.2	0.051	0.43
body morphogenesis	9	0.2	0.051	0.43
regulation of excitatory postsynaptic membrane potential	9	0.2	0.051	0.43
regulation of BMP signaling pathway	9	0.2	0.067	0.51
auditory receptor cell differentiation	9	0.2	0.087	0.58
negative regulation of angiogenesis	9	0.2	0.087	0.58
lung alveolus development	9	0.2	0.087	0.58
smooth muscle cell differentiation	8	0.2	0.0015	0.034
regulation of heart growth	8	0.2	0.0065	0.1
xenobiotic metabolic process	8	0.2	0.011	0.16
prostaglandin metabolic process	8	0.2	0.019	0.22
prostanoid metabolic process	8	0.2	0.019	0.22
embryonic gut development	8	0.2	0.019	0.22
positive regulation of tumor necrosis factor production	8	0.2	0.029	0.3
positive regulation of small GTPase mediated signal	8	0.2	0.029	0.3
regulation of vasoconstriction	8	0.2	0.029	0.3
positive regulation of smooth muscle cell proliferation	8	0.2	0.029	0.3
chondroitin sulfate proteoglycan metabolic process	8	0.2	0.041	0.38
regulation of biomineral formation	8	0.2	0.041	0.38
cGMP metabolic process	8	0.2	0.041	0.38
regulation of axon extension	8	0.2	0.041	0.38
response to xenobiotic stimulus	8	0.2	0.041	0.38
regulation of bone mineralization	8	0.2	0.041	0.38
negative regulation of B cell activation	8	0.2	0.057	0.46
retinoic acid metabolic process	8	0.2	0.057	0.46
labyrinthine layer morphogenesis	8	0.2	0.057	0.46
temperature homeostasis	8	0.2	0.077	0.54
regulation of acute inflammatory response	8	0.2	0.077	0.54
smooth muscle contraction	8	0.2	0.077	0.54
cranial nerve development	8	0.2	0.077	0.54
amino sugar metabolic process	8	0.2	0.1	0.62
positive regulation of cell size	8	0.2	0.1	0.62
dopamine metabolic process	8	0.2	0.1	0.62
branching involved in mammary gland duct morphogenesis	8	0.2	0.1	0.62
phosphagen metabolic process	7	0.2	0.00061	0.018
embryonic digestive tract morphogenesis	7	0.2	0.018	0.22
regulation of cardiac muscle growth	7	0.2	0.018	0.22
positive regulation of chemotaxis	7	0.2	0.018	0.22
regulation of cardiac muscle cell proliferation	7	0.2	0.018	0.22
cranial nerve morphogenesis	7	0.2	0.018	0.22
regulation of cardiac muscle tissue development	7	0.2	0.018	0.22
maternal process involved in female pregnancy	7	0.2	0.029	0.31
regulation of chemotaxis	7	0.2	0.029	0.31
negative regulation of ossification	7	0.2	0.029	0.31
cell differentiation involved in embryonic placenta	7	0.2	0.029	0.31
positive regulation of behavior	7	0.2	0.029	0.31
cAMP biosynthetic process	7	0.2	0.044	0.4
fatty acid transport	7	0.2	0.044	0.4
positive regulation of myeloid leukocyte differentiation	7	0.2	0.044	0.4
positive regulation of developmental growth	7	0.2	0.044	0.4
vasoconstriction	7	0.2	0.044	0.4
body fluid secretion	7	0.2	0.044	0.4
'de novo' posttranslational protein folding	7	0.2	0.064	0.49
motor axon guidance	7	0.2	0.064	0.49
regulation of gliogenesis	7	0.2	0.064	0.49
chondroitin sulfate metabolic process	7	0.2	0.064	0.49
positive regulation of Ras protein signal transduction	7	0.2	0.064	0.49
'de novo' protein folding	7	0.2	0.064	0.49
regulation of glial cell differentiation	7	0.2	0.064	0.49
regulation of cell-matrix adhesion	7	0.2	0.064	0.49
response to amphetamine	7	0.2	0.087	0.58
exocrine pancreas development	6	0.1	0.015	0.19
insulin-like growth factor receptor signaling pathway	6	0.1	0.028	0.3
positive regulation of muscle contraction	6	0.1	0.028	0.3
positive regulation of muscle cell differentiation	6	0.1	0.028	0.3
very-long-chain fatty acid metabolic process	6	0.1	0.028	0.3
positive regulation of positive chemotaxis	6	0.1	0.046	0.4
positive regulation of heart contraction	6	0.1	0.046	0.4
regulation of positive chemotaxis	6	0.1	0.046	0.4
morphogenesis of a polarized epithelium	6	0.1	0.07	0.51
calcium-dependent cell-cell adhesion	6	0.1	0.07	0.51
trabecula formation	6	0.1	0.07	0.51
chitin metabolic process	6	0.1	0.07	0.51
glucosamine metabolic process	6	0.1	0.07	0.51
regulation of CD4-positive, alpha beta T cell	6	0.1	0.07	0.51
positive regulation of peptide secretion	6	0.1	0.07	0.51
negative regulation of alpha-beta T cell activation	6	0.1	0.07	0.51
N-acetylglucosamine metabolic process	6	0.1	0.07	0.51
male sex determination	6	0.1	0.099	0.62
bone resorption	6	0.1	0.099	0.62
developmental cell growth	6	0.1	0.099	0.62
neuron recognition	6	0.1	0.099	0.62
prostate glandular acinus development	6	0.1	0.099	0.62
tissue regeneration	6	0.1	0.099	0.62
neuron projection regeneration	5	0.1	0.0093	0.13
regulation of receptor-mediated endocytosis	5	0.1	0.0093	0.13
regulation of cardioblast differentiation	5	0.1	0.0093	0.13
natriuresis	5	0.1	0.0093	0.13
axon regeneration	5	0.1	0.0093	0.13
positive regulation of cardioblast differentiation	5	0.1	0.0093	0.13
creatine metabolic process	5	0.1	0.0093	0.13
benzene and derivative metabolic process	5	0.1	0.023	0.26
lymph vessel development	5	0.1	0.023	0.26
mammary gland branching involved in pregnancy	5	0.1	0.023	0.26
signal peptide processing	5	0.1	0.023	0.26
dichotomous subdivision of an epithelial terminal unit	5	0.1	0.023	0.26
cardiac muscle tissue growth	5	0.1	0.045	0.4
regulation of T-helper cell differentiation	5	0.1	0.045	0.4
positive regulation of smooth muscle contraction	5	0.1	0.045	0.4
cardiac muscle cell proliferation	5	0.1	0.045	0.4
positive regulation of gliogenesis	5	0.1	0.045	0.4
heart growth	5	0.1	0.045	0.4
striated muscle cell proliferation	5	0.1	0.045	0.4
regulation of branching involved in prostate gland	5	0.1	0.045	0.4
positive regulation of glial cell differentiation	5	0.1	0.045	0.4
lipoprotein transport	5	0.1	0.045	0.4
positive regulation of smoothened signaling pathway	5	0.1	0.045	0.4
regulation of cholesterol biosynthetic process	5	0.1	0.074	0.53
regulation of Notch signaling pathway	5	0.1	0.074	0.53
spongiotrophoblast layer development	5	0.1	0.074	0.53
glycolipid biosynthetic process	5	0.1	0.074	0.53
branching involved in embryonic placenta morphogenesis	5	0.1	0.074	0.53
prepulse inhibition	5	0.1	0.074	0.53
mRNA modification	4	0.1	0.035	0.34
neuron remodeling	4	0.1	0.035	0.34
regulation of protein maturation by peptide bond	4	0.1	0.035	0.34
positive regulation of receptor-mediated endocytosis	4	0.1	0.035	0.34
regulation of T-helper 1 cell differentiation	4	0.1	0.035	0.34
rhombomere 5 development	4	0.1	0.035	0.34
peptidyl-proline modification	4	0.1	0.035	0.34
glial cell migration	4	0.1	0.035	0.34
regulation of complement activation	4	0.1	0.035	0.34
response to growth hormone stimulus	4	0.1	0.073	0.53
lipopolysaccharide biosynthetic process	4	0.1	0.073	0.53
positive regulation of T-helper cell differentiation	4	0.1	0.073	0.53
negative regulation of CD4-positive, alpha beta T cell	4	0.1	0.073	0.53
diuresis	4	0.1	0.073	0.53
embryonic gut morphogenesis	4	0.1	0.073	0.53
regulation of T-helper 2 cell differentiation	4	0.1	0.073	0.53
renal water homeostasis	4	0.1	0.073	0.53
toxin metabolic process	4	0.1	0.073	0.53
response to lipoteichoic acid	4	0.1	0.073	0.53
regulation of protein processing	4	0.1	0.073	0.53
negative regulation of myeloid cell apoptosis	4	0.1	0.073	0.53
negative regulation of cardiac muscle cell proliferation	4	0.1	0.073	0.53
growth hormone receptor signaling pathway	4	0.1	0.073	0.53
intramembranous ossification	4	0.1	0.073	0.53
negative regulation of T-helper cell differentiation	4	0.1	0.073	0.53
transmembrane receptor protein serine/threonine kinase
patterning of blood vessels		0.4	2e-05	0.0011
positive regulation of nucleobase, nucleoside,
antigen processing and presentation of peptide antigen
antigen processing and presentation of exogenous peptide
antigen processing and presentation of peptide or
dichotomous subdivision of terminal units involved in
regulation of adenylate cyclase activity involved in
positive regulation of adenylate cyclase activity by
activation of adenylate cyclase activity by G-protein
activation of phospholipase C activity by G-protein
activation of plasma proteins involved in acute
regulation of systemic arterial blood pressure mediated
adaptive immune response based on somatic recombination
elevation of cytosolic calcium ion concentration during
antigen processing and presentation of exogenous peptide
establishment or maintenance of epithelial cell
regulation of systemic arterial blood pressure by
peptide cross-linking via chondroitin 4-sulfate
regulation of transforming growth factor beta receptor
<http://www.firstgov.gov/>	<http://www.firstgov.gov/>

## Sheet: UP_transcripts
ensembl_gene_id	ratio	Associated_Gene_Name
ENSMUSG00000054272	3493.76	Zscan4c
ENSMUSG00000054272	3438.86	Zscan4c
ENSMUSG00000070828	3289.87	Zscan4f
ENSMUSG00000070828	3215.14	Zscan4f
ENSMUSG00000070828	3110.37	Zscan4f
ENSMUSG00000019768	2987.51	Esr1
ENSMUSG00000062170	561.689	Fmr1nb
ENSMUSG00000062170	559.934	Fmr1nb
ENSMUSG00000062170	489.719	Fmr1nb
ENSMUSG00000014599	450.855	Csf1
ENSMUSG00000018924	367.655	Alox15
ENSMUSG00000029188	365.939	Slc34a2
ENSMUSG00000008136	285.581	Fhl2
ENSMUSG00000058976	258.125	Usp17l5
ENSMUSG00000031963	248.565	Bmper
ENSMUSG00000037440	246.039	Vnn1
ENSMUSG00000032327	228.052	Stra6
ENSMUSG00000026450	226.035	Chit1
ENSMUSG00000032327	221.089	Stra6
ENSMUSG00000032327	219.937	Stra6
ENSMUSG00000032327	219.937	Stra6
ENSMUSG00000031410	194.945	Nxf7
ENSMUSG00000030782	188.164	Tgfb1i1
ENSMUSG00000057321	172.593	Dub2a
ENSMUSG00000056222	140.559	Spock1
ENSMUSG00000056222	137.091	Spock1
ENSMUSG00000056222	134.486	Spock1
ENSMUSG00000014599	132.595	Csf1
ENSMUSG00000024529	127.767	Lox
ENSMUSG00000024659	120.227	Anxa1
ENSMUSG00000020077	119.307	Srgn
ENSMUSG00000036832	118.706	Lpar3
ENSMUSG00000006642	117.262	Tcf23
ENSMUSG00000032085	117.166	Tagln
ENSMUSG00000034738	116.959	Nostrin
ENSMUSG00000031375	114.699	Bgn
ENSMUSG00000033634	113.49	Cml2
ENSMUSG00000038415	113.168	Foxq1
ENSMUSG00000026043	108.678	Col3a1
ENSMUSG00000031503	108.348	Col4a2
ENSMUSG00000037025	102.762	Foxa2
ENSMUSG00000020057	102.481	Dram1
ENSMUSG00000014599	102.17	Csf1
ENSMUSG00000020053	100.83	Igf1
ENSMUSG00000007440	99.153	Pcdha11
ENSMUSG00000040152	93.7968	Thbs1
ENSMUSG00000030762	93.4036	Aqp8
ENSMUSG00000021944	91.0322	Gata4
ENSMUSG00000030762	90.2005	Aqp8
ENSMUSG00000030093	90.1923	Wnt7a
ENSMUSG00000025902	89.6245	Sox17
ENSMUSG00000032035	89.3554	Ets1
ENSMUSG00000031502	88.4454	Col4a1
ENSMUSG00000028776	88.124	Tinagl1
ENSMUSG00000079714	85.8188	NA
ENSMUSG00000032359	83.8116	Ctsh
ENSMUSG00000032332	83.5143	Col12a1
ENSMUSG00000028776	82.5761	Tinagl1
ENSMUSG00000042429	82.4011	Adora1
ENSMUSG00000038244	82.3703	Mical2
ENSMUSG00000044170	81.6958	Olfr1384
ENSMUSG00000075602	80.0757	Ly6a
ENSMUSG00000029195	79.8985	Klb
ENSMUSG00000022952	79.2827	Runx1
ENSMUSG00000026042	77.1198	Col5a2
ENSMUSG00000042429	76.1585	Adora1
ENSMUSG00000032035	75.0177	Ets1
ENSMUSG00000039405	74.6907	Prss23
ENSMUSG00000034159	74.5593	2310007B03Rik
ENSMUSG00000034159	74.5593	2310007B03Rik
ENSMUSG00000022952	74.3637	Runx1
ENSMUSG00000021280	74.0011	1200009I06Rik
ENSMUSG00000021708	72.2491	Rasgrf2
ENSMUSG00000024338	72.2425	Psmb8
ENSMUSG00000029231	70.7147	Pdgfra
ENSMUSG00000029231	70.3439	Pdgfra
ENSMUSG00000078942	70.0301	Naip6
ENSMUSG00000007440	69.4876	Pcdha11
ENSMUSG00000032492	67.5132	Pth1r
ENSMUSG00000038580	66.4969	Sct
ENSMUSG00000032492	65.9469	Pth1r
ENSMUSG00000032492	65.7356	Pth1r
ENSMUSG00000007440	65.3142	Pcdha11
ENSMUSG00000030365	65.2716	Clec2i
ENSMUSG00000034591	65.1788	Slc41a2
ENSMUSG00000040253	63.8382	Gbp7
ENSMUSG00000040253	63.8382	Gbp7
ENSMUSG00000022952	63.6742	Runx1
ENSMUSG00000020080	63.0762	Hkdc1
ENSMUSG00000029321	63.0592	Slc10a6
ENSMUSG00000042961	62.1777	Egflam
ENSMUSG00000054196	61.5004	Cthrc1
ENSMUSG00000074497	61.4972	A430078G23Rik
ENSMUSG00000028364	59.8255	Tnc
ENSMUSG00000022270	59.3464	Fam134b
ENSMUSG00000079450	57.9231	3110007F17Rik
ENSMUSG00000029108	57.8232	Pcdh7
ENSMUSG00000032060	57.199	Cryab
ENSMUSG00000022952	56.8852	Runx1
ENSMUSG00000026726	56.6471	Cubn
ENSMUSG00000049420	56.227	Tmem200a
ENSMUSG00000007440	56.0295	Pcdha11
ENSMUSG00000078746	55.8053	Gm13298
ENSMUSG00000029108	55.4931	Pcdh7
ENSMUSG00000021211	55.2643	Akr1c12
ENSMUSG00000028270	55.1199	Gbp2
ENSMUSG00000018339	54.2751	Gpx3
ENSMUSG00000018339	54.2348	Gpx3
ENSMUSG00000040148	53.7433	Hmx3
ENSMUSG00000031355	53.7411	Arhgap6
ENSMUSG00000030930	53.4156	Chst15
ENSMUSG00000031538	53.3678	Plat
ENSMUSG00000033191	53.1719	Tie1
ENSMUSG00000074743	52.5901	Thbd
ENSMUSG00000025017	52.5783	Pik3ap1
ENSMUSG00000049382	51.2742	Krt8
ENSMUSG00000043342	51.1452	Hoxd9
ENSMUSG00000032204	50.8595	Aqp9
ENSMUSG00000028332	50.6046	Hemgn
ENSMUSG00000028268	50.4423	Gbp3
ENSMUSG00000057092	50.0354	Fxyd3
ENSMUSG00000020679	49.1357	Hnf1b
ENSMUSG00000050295	48.5625	Foxc1
ENSMUSG00000022044	48.5603	Stmn4
ENSMUSG00000075611	48.3259	Gm11545
ENSMUSG00000036856	48.2923	Wnt4
ENSMUSG00000022505	48.2922	Emp2
ENSMUSG00000043336	48.2658	Filip1l
ENSMUSG00000007440	48.0994	Pcdha11
ENSMUSG00000051022	47.725	Hs3st1
ENSMUSG00000022150	47.2898	Dab2
ENSMUSG00000039037	47.2686	St6galnac5
ENSMUSG00000075007	45.9622	NA
ENSMUSG00000031853	45.6765	BC021891
ENSMUSG00000090124	45.5927	Ugt1a7c
ENSMUSG00000073421	45.3841	H2-Ab1
ENSMUSG00000066721	45.3625	Zfp575
ENSMUSG00000031871	45.2773	Cdh5
ENSMUSG00000067299	45.2484	Crygd
ENSMUSG00000022150	45.2011	Dab2
ENSMUSG00000036964	45.0917	Trim17
ENSMUSG00000007440	45.0258	Pcdha11
ENSMUSG00000056481	44.9165	Cd248
ENSMUSG00000018907	44.5114	Alox12e
ENSMUSG00000026628	44.0228	Atf3
ENSMUSG00000027358	43.9245	Bmp2
ENSMUSG00000029648	43.8457	Flt1
ENSMUSG00000022150	43.7196	Dab2
ENSMUSG00000022150	43.2981	Dab2
ENSMUSG00000030214	42.769	Plbd1
ENSMUSG00000021278	42.7519	Amn
ENSMUSG00000046287	42.5889	Pnma3
ENSMUSG00000022146	42.498	Osmr
ENSMUSG00000016995	42.2086	Matn4
ENSMUSG00000048612	42.0308	Myof
ENSMUSG00000056380	41.8956	Gpr50
ENSMUSG00000031636	41.6287	Pdlim3
ENSMUSG00000021838	41.585	Samd4
ENSMUSG00000042115	41.3725	Klhdc8a
ENSMUSG00000035273	41.3374	Hpse
ENSMUSG00000028031	41.3179	Dkk2
ENSMUSG00000063873	41.1085	Slc24a3
ENSMUSG00000035314	41.1061	Gdpd5
ENSMUSG00000021591	40.9249	Glrx
ENSMUSG00000040165	40.4442	Cd209c
ENSMUSG00000043391	39.4823	2510009E07Rik
ENSMUSG00000070867	39.2078	Gm12824
ENSMUSG00000021365	39.0751	Nedd9
ENSMUSG00000040413	38.8831	Timd2
ENSMUSG00000000058	38.7172	Cav2
ENSMUSG00000073497	38.4401	AA792892
ENSMUSG00000028635	38.3538	Edn2
ENSMUSG00000007440	38.3071	Pcdha11
ENSMUSG00000068299	38.2033	1700019G17Rik
ENSMUSG00000028469	38.1678	Npr2
ENSMUSG00000006154	38.159	Eps8l1
ENSMUSG00000040413	38.0126	Timd2
ENSMUSG00000040413	38.0126	Timd2
ENSMUSG00000022098	37.9336	Bmp1
ENSMUSG00000031355	37.5455	Arhgap6
ENSMUSG00000063661	37.3136	Krt73
ENSMUSG00000028716	36.7369	Pdzk1ip1
ENSMUSG00000025075	36.7254	Habp2
ENSMUSG00000028716	36.7237	Pdzk1ip1
ENSMUSG00000073209	36.4225	Klf14
ENSMUSG00000024868	36.3321	Dkk1
ENSMUSG00000060131	35.8655	Atp8b4
ENSMUSG00000007440	35.7496	Pcdha11
ENSMUSG00000067276	35.428	Capn6
ENSMUSG00000022098	35.3428	Bmp1
ENSMUSG00000073874	35.2623	4933409K07Rik
ENSMUSG00000023959	35.0277	Clic5
ENSMUSG00000022054	34.8274	Nefm
ENSMUSG00000028023	34.8075	Pitx2
ENSMUSG00000063568	34.7169	Jazf1
ENSMUSG00000037411	34.4214	Serpine1
ENSMUSG00000057767	34.2974	Olfr1383
ENSMUSG00000017897	34.0968	Eya2
ENSMUSG00000042812	34.0924	Foxf1a
ENSMUSG00000029561	33.5772	Oasl2
ENSMUSG00000035201	33.3529	B020004J07Rik
ENSMUSG00000005124	32.9951	Wisp1
ENSMUSG00000020019	32.9782	Ntn4
ENSMUSG00000058571	32.6456	Gpc6
ENSMUSG00000020053	32.3803	Igf1
ENSMUSG00000050069	32.378	Grem2
ENSMUSG00000034918	32.3699	Cdhr2
ENSMUSG00000048583	32.2163	Igf2
ENSMUSG00000027360	32.1934	Hdc
ENSMUSG00000048583	32.1451	Igf2
ENSMUSG00000043943	32.1413	Naalad2
ENSMUSG00000029618	32.1297	Ocm
ENSMUSG00000017607	32.1206	Tns4
ENSMUSG00000070436	31.9151	Serpinh1
ENSMUSG00000068686	31.7829	Cd59b
ENSMUSG00000021253	31.7756	Tgfb3
ENSMUSG00000020053	31.76	Igf1
ENSMUSG00000021838	31.6445	Samd4
ENSMUSG00000040447	31.428	Spns2
ENSMUSG00000067818	31.4254	Myl9
ENSMUSG00000070436	31.0785	Serpinh1
ENSMUSG00000048583	30.9757	Igf2
ENSMUSG00000070436	30.9506	Serpinh1
ENSMUSG00000036006	30.9383	Fam65b
ENSMUSG00000000385	30.8736	Tmprss2
ENSMUSG00000028716	30.6503	Pdzk1ip1
ENSMUSG00000041717	30.6481	Golt1a
ENSMUSG00000022037	30.5477	Clu
ENSMUSG00000045312	30.3927	Lhfpl2
ENSMUSG00000041923	30.3513	Nol4
ENSMUSG00000037010	30.12	Apln
ENSMUSG00000063568	30.0833	Jazf1
ENSMUSG00000061082	30.0788	Plac1
ENSMUSG00000023043	29.6532	Krt18
ENSMUSG00000022594	29.5996	Lynx1
ENSMUSG00000030468	29.4985	Siglecg
ENSMUSG00000052396	29.4654	Mogat2
ENSMUSG00000078942	29.3012	Naip6
ENSMUSG00000005836	29.1808	Gata6
ENSMUSG00000040650	29.1762	Cyp2b23
ENSMUSG00000038692	29.0128	Hoxb4
ENSMUSG00000058571	28.9183	Gpc6
ENSMUSG00000020053	28.8535	Igf1
ENSMUSG00000021838	28.8274	Samd4
ENSMUSG00000032548	28.7692	Slco2a1
ENSMUSG00000021365	28.7373	Nedd9
ENSMUSG00000038168	28.6281	Leprel1
ENSMUSG00000087107	28.4708	AI662270
ENSMUSG00000079012	28.3888	Serpina3m
ENSMUSG00000018217	28.3202	Pmp22
ENSMUSG00000020053	28.2331	Igf1
ENSMUSG00000070044	28.0257	Fam149a
ENSMUSG00000001506	27.8811	Col1a1
ENSMUSG00000032231	27.8533	Anxa2
ENSMUSG00000043613	27.7311	Mmp3
ENSMUSG00000022270	27.3632	Fam134b
ENSMUSG00000075304	26.8326	Sp5
ENSMUSG00000041886	26.597	Macc1
ENSMUSG00000027335	26.5572	Adra1d
ENSMUSG00000028565	26.5485	Nfia
ENSMUSG00000038648	26.4561	Creb3l2
ENSMUSG00000012282	26.4217	Wnt8a
ENSMUSG00000015968	26.3281	Cacna1d
ENSMUSG00000027434	26.3002	Nkx2-2
ENSMUSG00000044294	26.2488	Krt84
ENSMUSG00000039116	26.0926	Gpr126
ENSMUSG00000034463	26.0299	Scara3
ENSMUSG00000055493	26.0167	Epm2a
ENSMUSG00000040605	26.0123	Bace2
ENSMUSG00000044976	25.999	Wdr72
ENSMUSG00000028813	25.9905	CK137956
ENSMUSG00000060586	25.8014	H2-Eb1
ENSMUSG00000026971	25.649	Itgb6
ENSMUSG00000026971	25.649	Itgb6
ENSMUSG00000015968	25.6453	Cacna1d
ENSMUSG00000000125	25.6034	Wnt3
ENSMUSG00000051159	25.5397	Cited1
ENSMUSG00000030616	25.5338	Sytl2
ENSMUSG00000070687	25.4231	Htr1d
ENSMUSG00000059334	25.1113	Zfp36l3
ENSMUSG00000017950	24.9535	Hnf4a
ENSMUSG00000070287	24.8782	Tmem22
ENSMUSG00000020963	24.3868	Tshr
ENSMUSG00000015579	24.3492	Nkx2-5
ENSMUSG00000043664	24.2757	Tmem221
ENSMUSG00000034532	24.2669	Fbxo16
ENSMUSG00000028565	24.2256	Nfia
ENSMUSG00000028565	24.219	Nfia
ENSMUSG00000036006	24.0011	Fam65b
ENSMUSG00000052613	23.9075	Pcdh15
ENSMUSG00000052613	23.9075	Pcdh15
ENSMUSG00000052613	23.9075	Pcdh15
ENSMUSG00000052613	23.9075	Pcdh15
ENSMUSG00000052613	23.9075	Pcdh15
ENSMUSG00000052613	23.9075	Pcdh15
ENSMUSG00000052613	23.9075	Pcdh15
ENSMUSG00000058207	23.823	Serpina3k
ENSMUSG00000012017	23.8082	Scarf2
ENSMUSG00000025983	23.7131	Ccdc150
ENSMUSG00000051359	23.6176	Ncald
ENSMUSG00000042942	23.617	Greb1l
ENSMUSG00000021876	23.4436	Rnase4
ENSMUSG00000054728	23.3585	Phactr1
ENSMUSG00000074317	23.3349	NA
ENSMUSG00000024313	23.3259	Mep1b
ENSMUSG00000026879	23.1821	Gsn
ENSMUSG00000021469	23.0945	Msx2
ENSMUSG00000000184	22.9219	Ccnd2
ENSMUSG00000041078	22.8912	Grid1
ENSMUSG00000039385	22.8349	Cdh6
ENSMUSG00000022237	22.7117	Ankrd33b
ENSMUSG00000047642	22.6702	D930020B18Rik
ENSMUSG00000037335	22.6083	Hand1
ENSMUSG00000048528	22.5589	Nkx1-2
ENSMUSG00000015484	22.526	Fam163a
ENSMUSG00000054423	22.5216	Cadps
ENSMUSG00000054423	22.5216	Cadps
ENSMUSG00000030792	22.5135	Dkkl1
ENSMUSG00000045827	22.2806	Serpinb9
ENSMUSG00000024593	22.2061	Megf10
ENSMUSG00000052353	22.0748	9930013L23Rik
ENSMUSG00000030068	22.0199	Eif4e3
ENSMUSG00000037235	22.0062	Mxd4
ENSMUSG00000019429	21.9722	Ffar3
ENSMUSG00000032487	21.9209	Ptgs2
ENSMUSG00000018906	21.8471	P4ha2
ENSMUSG00000068893	21.8001	Sprr2a2
ENSMUSG00000078664	21.8001	Sprr2a1
ENSMUSG00000042349	21.7317	Ikbke
ENSMUSG00000021186	21.6953	Fbln5
ENSMUSG00000031486	21.6567	Gpr124
ENSMUSG00000060685	21.5467	Gm14511
ENSMUSG00000078206	21.5467	Gm14458
ENSMUSG00000086266	21.541	Igf2as
ENSMUSG00000018906	21.4287	P4ha2
ENSMUSG00000041986	21.4007	Elmod1
ENSMUSG00000022488	21.3817	Nckap1l
ENSMUSG00000051359	21.2963	Ncald
ENSMUSG00000024331	21.2125	Dsc2
ENSMUSG00000027419	21.2065	Pcsk2
ENSMUSG00000021091	21.1481	Serpina3n
ENSMUSG00000050397	21.126	Foxl2
ENSMUSG00000032105	21.0038	Pdzd3
ENSMUSG00000022367	20.7195	Has2
ENSMUSG00000021876	20.6011	Rnase4
ENSMUSG00000028023	20.561	Pitx2
ENSMUSG00000049723	20.4736	Mmp12
ENSMUSG00000066361	20.3739	Serpina3c
ENSMUSG00000050100	20.2445	Hmx2
ENSMUSG00000036972	20.2357	Zic4
ENSMUSG00000021909	20.2313	Tnnc1
ENSMUSG00000028023	20.1908	Pitx2
ENSMUSG00000028280	20.1191	Gabrr1
ENSMUSG00000030770	20.1122	Parva
ENSMUSG00000015093	20.1117	Clic3
ENSMUSG00000009687	20.0481	Fxyd5
ENSMUSG00000070870	20.0315	Cryge
ENSMUSG00000034035	19.9278	Ccdc17
ENSMUSG00000029135	19.9227	Fosl2
ENSMUSG00000032796	19.8566	Lama1
ENSMUSG00000058589	19.8518	Anks1b
ENSMUSG00000022949	19.7688	Clic6
ENSMUSG00000058523	19.7264	Mup5
ENSMUSG00000024380	19.6598	Gypc
ENSMUSG00000024907	19.6598	Gal
ENSMUSG00000032006	19.651	Pdgfd
ENSMUSG00000063851	19.6465	Rnf183
ENSMUSG00000056888	19.6264	Glipr1
ENSMUSG00000020044	19.591	Timp3
ENSMUSG00000020810	19.5758	Cygb
ENSMUSG00000029185	19.529	Fam114a1
ENSMUSG00000062327	19.4901	T
ENSMUSG00000025885	19.4834	Myo5b
ENSMUSG00000037949	19.4811	Ano10
ENSMUSG00000009687	19.2714	Fxyd5
ENSMUSG00000066688	19.1521	Gm13083
ENSMUSG00000061825	19.1096	Ces2c
ENSMUSG00000046743	19.0751	Fat4
ENSMUSG00000041842	19.0314	Fhdc1
ENSMUSG00000051726	18.9926	Kcnf1
ENSMUSG00000051359	18.9839	Ncald
ENSMUSG00000051359	18.9839	Ncald
ENSMUSG00000025892	18.8831	Gria4
ENSMUSG00000063415	18.8757	Cyp26b1
ENSMUSG00000063415	18.8757	Cyp26b1
ENSMUSG00000079018	18.7935	Ly6c1
ENSMUSG00000051397	18.7211	Tacstd2
ENSMUSG00000034324	18.7179	Tmem132c
ENSMUSG00000079395	18.5015	Gm15114
ENSMUSG00000039865	18.4967	Slc44a3
ENSMUSG00000021187	18.4881	Tc2n
ENSMUSG00000055194	18.2176	Actbl2
ENSMUSG00000054889	18.2133	Dsp
ENSMUSG00000064065	18.2024	Ipcef1
ENSMUSG00000074313	18.1914	NA
ENSMUSG00000030004	18.1775	Nat8
ENSMUSG00000022986	18.1711	Krt75
ENSMUSG00000022330	18.1226	Osr2
ENSMUSG00000025892	18.1094	Gria4
ENSMUSG00000022237	18.0825	Ankrd33b
ENSMUSG00000052364	18.0455	B630019K06Rik
ENSMUSG00000071815	18.0186	Fthl17
ENSMUSG00000024738	17.9407	Pga5
ENSMUSG00000038305	17.8852	Spats2l
ENSMUSG00000015224	17.8356	Cyp2j9
ENSMUSG00000072905	17.7901	Gm5662
ENSMUSG00000032679	17.7555	Cd59a
ENSMUSG00000034205	17.6537	Loxl2
ENSMUSG00000039004	17.6269	Bmp6
ENSMUSG00000030616	17.5877	Sytl2
ENSMUSG00000030616	17.584	Sytl2
ENSMUSG00000060572	17.5327	Mfap2
ENSMUSG00000074673	17.5088	Ttll9
ENSMUSG00000040322	17.3545	Slc25a24
ENSMUSG00000026586	17.3468	Prrx1
ENSMUSG00000073407	17.3408	Gm6034
ENSMUSG00000031326	17.3386	Cdx4
ENSMUSG00000032679	17.3227	Cd59a
ENSMUSG00000039578	17.3135	Fam190a
ENSMUSG00000030551	17.2412	Nr2f2
ENSMUSG00000031274	17.2045	Col4a5
ENSMUSG00000024727	17.1803	Trpm6
ENSMUSG00000025555	17.1627	Farp1
ENSMUSG00000032649	17.0506	Glt25d2
ENSMUSG00000073027	17.0187	Dmrtc1b
ENSMUSG00000023232	17.0142	Serinc2
ENSMUSG00000029761	16.9755	Cald1
ENSMUSG00000085795	16.9716	Zfp703
ENSMUSG00000039578	16.9109	Fam190a
ENSMUSG00000021411	16.862	1300014I06Rik
ENSMUSG00000000093	16.7967	Tbx2
ENSMUSG00000001021	16.7848	S100a3
ENSMUSG00000022053	16.7759	Ebf2
ENSMUSG00000051279	16.7759	Gdf6
ENSMUSG00000027215	16.7633	Cd82
ENSMUSG00000007440	16.7538	Pcdha11
ENSMUSG00000050761	16.745	Gp1bb
ENSMUSG00000050761	16.745	Gp1bb
ENSMUSG00000009292	16.7433	Trpm2
ENSMUSG00000032020	16.7216	Ubash3b
ENSMUSG00000062393	16.7147	Dgkk
ENSMUSG00000085795	16.6797	Zfp703
ENSMUSG00000036181	16.6702	Hist1h1c
ENSMUSG00000028584	16.5692	Lrrc38
ENSMUSG00000021892	16.5537	Sh3bp5
ENSMUSG00000037606	16.4601	Osbpl5
ENSMUSG00000021725	16.4549	Parp8
ENSMUSG00000022799	16.4211	Arhgap31
ENSMUSG00000078208	16.3941	Gm5634
ENSMUSG00000036306	16.3861	Lzts1
ENSMUSG00000020388	16.2723	Pdlim4
ENSMUSG00000007279	16.2697	Scube2
ENSMUSG00000002266	16.2089	Zim1
ENSMUSG00000021943	16.1956	Gdf10
ENSMUSG00000062773	16.1956	Tex101
ENSMUSG00000062960	16.1941	Kdr
ENSMUSG00000023979	16.1868	Guca1b
ENSMUSG00000017466	16.1628	Timp2
ENSMUSG00000020473	16.13	Aebp1
ENSMUSG00000020467	16.0805	Efemp1
ENSMUSG00000028033	15.9752	Kcnq5
ENSMUSG00000028033	15.9752	Kcnq5
ENSMUSG00000005107	15.9033	Slc2a9
ENSMUSG00000010080	15.8944	Epn3
ENSMUSG00000025185	15.8756	Loxl4
ENSMUSG00000038305	15.8735	Spats2l
ENSMUSG00000051515	15.8028	Fam181b
ENSMUSG00000028780	15.797	Sema3c
ENSMUSG00000025185	15.7789	Loxl4
ENSMUSG00000046908	15.694	Ltb4r1
ENSMUSG00000021298	15.6197	Gpr132
ENSMUSG00000027215	15.609	Cd82
ENSMUSG00000060572	15.6081	Mfap2
ENSMUSG00000072115	15.5309	Ang
ENSMUSG00000029338	15.4647	Antxr2
ENSMUSG00000018593	15.4435	Sparc
ENSMUSG00000070908	15.4411	Gm13288
ENSMUSG00000079018	15.3557	Ly6c1
ENSMUSG00000025789	15.3296	St8sia2
ENSMUSG00000048779	15.3274	P2ry6
ENSMUSG00000031189	15.3163	Aff2
ENSMUSG00000006538	15.21	Ihh
ENSMUSG00000031274	15.1823	Col4a5
ENSMUSG00000039316	15.131	Rftn1
ENSMUSG00000025197	15.0438	Cyp2c44
ENSMUSG00000052516	15.0438	Robo2
ENSMUSG00000020481	15.0394	Ankrd36
ENSMUSG00000021381	15.0361	Barx1
ENSMUSG00000059395	15.035	Nkapl
ENSMUSG00000027712	15.0335	Anxa5
ENSMUSG00000031216	15.0182	Stard8
ENSMUSG00000022892	15.0135	App
ENSMUSG00000022139	15.0044	Mbnl2
ENSMUSG00000020411	14.9292	Nipal4
ENSMUSG00000054720	14.8532	Lrrc8c
ENSMUSG00000031803	14.8474	B3gnt3
ENSMUSG00000024778	14.832	Fas
ENSMUSG00000059430	14.753	Actg2
ENSMUSG00000048332	14.7136	Lhfp
ENSMUSG00000027858	14.7112	Tspan2
ENSMUSG00000048616	14.7067	Nog
ENSMUSG00000021187	14.5892	Tc2n
ENSMUSG00000035615	14.5811	Frmpd1
ENSMUSG00000074813	14.5342	Gm14005
ENSMUSG00000047428	14.5319	Dlk2
ENSMUSG00000050064	14.5232	Zfp697
ENSMUSG00000022136	14.4954	Dnajc3
ENSMUSG00000049191	14.4723	Rgag4
ENSMUSG00000028634	14.468	Hivep3
ENSMUSG00000024500	14.4525	Ppp2r2b
ENSMUSG00000032036	14.447	Kirrel3
ENSMUSG00000032036	14.447	Kirrel3
ENSMUSG00000032036	14.447	Kirrel3
ENSMUSG00000032036	14.447	Kirrel3
ENSMUSG00000004562	14.4353	Arhgef40
ENSMUSG00000026343	14.3731	Gpr39
ENSMUSG00000033149	14.3652	Phldb2
ENSMUSG00000074673	14.3413	Ttll9
ENSMUSG00000037321	14.3359	Tap1
ENSMUSG00000022139	14.3329	Mbnl2
ENSMUSG00000031880	14.3052	Rrad
ENSMUSG00000000126	14.1744	Wnt9a
ENSMUSG00000080712	14.1428	Hist3h2bb-ps
ENSMUSG00000052981	14.0737	Ube2ql1
ENSMUSG00000075496	14.0663	Gm10845
ENSMUSG00000027070	14.0085	Lrp2
ENSMUSG00000024987	14	Cyp26a1
ENSMUSG00000022762	13.9959	Ncam2
ENSMUSG00000024087	13.9931	Cyp1b1
ENSMUSG00000023903	13.9713	Mmp25
ENSMUSG00000061143	13.9556	Maml3
ENSMUSG00000061878	13.9277	Sphk1
ENSMUSG00000061878	13.9277	Sphk1
ENSMUSG00000061878	13.925	Sphk1
ENSMUSG00000020911	13.8851	Krt19
ENSMUSG00000019929	13.8744	Dcn
ENSMUSG00000019929	13.8744	Dcn
ENSMUSG00000038903	13.8567	Ccdc68
ENSMUSG00000041688	13.8397	Amot
ENSMUSG00000031952	13.8208	Chst5
ENSMUSG00000004562	13.8033	Arhgef40
ENSMUSG00000038077	13.801	Kcna6
ENSMUSG00000021592	13.7858	Arsk
ENSMUSG00000004562	13.7759	Arhgef40
ENSMUSG00000056895	13.7499	Hist3h2ba
ENSMUSG00000034903	13.7425	Cobll1
ENSMUSG00000073294	13.7315	AU022751
ENSMUSG00000026227	13.7299	2810459M11Rik
ENSMUSG00000050424	13.7046	Pnma5
ENSMUSG00000000197	13.6809	Nalcn
ENSMUSG00000045672	13.6716	Col27a1
ENSMUSG00000042078	13.6434	Svop
ENSMUSG00000035104	13.6362	Fam176a
ENSMUSG00000005107	13.5953	Slc2a9
ENSMUSG00000036560	13.5953	Lgi4
ENSMUSG00000030551	13.5798	Nr2f2
ENSMUSG00000026227	13.5785	2810459M11Rik
ENSMUSG00000051615	13.5404	Rap2a
ENSMUSG00000074359	13.5252	Psg23
ENSMUSG00000073294	13.4414	AU022751
ENSMUSG00000053141	13.4036	Ptprt
ENSMUSG00000058624	13.3626	Gda
ENSMUSG00000072115	13.3354	Ang
ENSMUSG00000039546	13.3051	Ajap1
ENSMUSG00000035984	13.3029	Nme5
ENSMUSG00000037370	13.3018	Enpp1
ENSMUSG00000033721	13.3007	Vav3
ENSMUSG00000032680	13.2941	6820408C15Rik
ENSMUSG00000019359	13.2897	Gdpd2
ENSMUSG00000051373	13.2897	Ppapdc3
ENSMUSG00000070306	13.2617	Ccdc153
ENSMUSG00000070034	13.2439	Sp110
ENSMUSG00000036030	13.2419	Prtg
ENSMUSG00000069227	13.1824	Gprin1
ENSMUSG00000049191	13.1673	Rgag4
ENSMUSG00000047712	13.1646	Ust
ENSMUSG00000046805	13.1043	Mpeg1
ENSMUSG00000034416	13.1036	Pkd1l2
ENSMUSG00000045211	13.0623	Nudt18
ENSMUSG00000034903	13.0498	Cobll1
ENSMUSG00000040212	13.023	Emp3
ENSMUSG00000021959	13.005	Lats2
ENSMUSG00000038805	13.0036	Six3
ENSMUSG00000020475	13.0007	Pgam2
ENSMUSG00000021403	12.992	Serpinb9b
ENSMUSG00000032440	12.9829	Tgfbr2
ENSMUSG00000050092	12.9533	Sprr2b
ENSMUSG00000074196	12.9396	Gm6289
ENSMUSG00000051081	12.9321	Gm4847
ENSMUSG00000029669	12.919	Tspan12
ENSMUSG00000068699	12.8893	Flnc
ENSMUSG00000074766	12.8666	Ism1
ENSMUSG00000040187	12.8592	Arntl2
ENSMUSG00000033209	12.8155	Ttc28
ENSMUSG00000042228	12.8027	Lyn
ENSMUSG00000027508	12.7693	Pag1
ENSMUSG00000056145	12.7359	AI504432
ENSMUSG00000049999	12.7241	Ppp1r3d
ENSMUSG00000061878	12.7215	Sphk1
ENSMUSG00000074813	12.7197	Gm14005
ENSMUSG00000073067	12.7152	9130019P16Rik
ENSMUSG00000023945	12.7049	Slc5a7
ENSMUSG00000022894	12.6474	Adamts5
ENSMUSG00000003545	12.6412	Fosb
ENSMUSG00000039384	12.6247	Dusp10
ENSMUSG00000027797	12.5945	Dclk1
ENSMUSG00000033214	12.5858	Slitrk5
ENSMUSG00000036412	12.58	Arsi
ENSMUSG00000064294	12.5735	Aox3
ENSMUSG00000032440	12.5716	Tgfbr2
ENSMUSG00000043165	12.5555	Lor
ENSMUSG00000021792	12.5258	5730469M10Rik
ENSMUSG00000024731	12.51	Ms4a10
ENSMUSG00000049830	12.5069	Gm9839
ENSMUSG00000005107	12.4391	Slc2a9
ENSMUSG00000027797	12.4303	Dclk1
ENSMUSG00000046159	12.4192	Chrm3
ENSMUSG00000033684	12.4063	Qsox1
ENSMUSG00000042228	12.3651	Lyn
ENSMUSG00000022237	12.3461	Ankrd33b
ENSMUSG00000066800	12.3418	Rnasel
ENSMUSG00000054052	12.3245	Rdh19
ENSMUSG00000033684	12.302	Qsox1
ENSMUSG00000031799	12.262	Tpm4
ENSMUSG00000040146	12.2486	Rgl3
ENSMUSG00000024074	12.246	Crim1
ENSMUSG00000079857	12.2454	NA
ENSMUSG00000087775	12.2431	RNaseP_nuc
ENSMUSG00000031022	12.242	BC051019
ENSMUSG00000020633	12.225	Dcdc2c
ENSMUSG00000004891	12.1812	Nes
ENSMUSG00000020774	12.1511	Aspa
ENSMUSG00000022583	12.1467	Ly6f
ENSMUSG00000019848	12.1438	Popdc3
ENSMUSG00000055737	12.1416	Ghr
ENSMUSG00000034127	12.1379	Tspan8
ENSMUSG00000026072	12.1335	Il1r1
ENSMUSG00000026072	12.1335	Il1r1
ENSMUSG00000029096	12.1335	Htra3
ENSMUSG00000037437	12.1335	Adam32
ENSMUSG00000058152	12.1335	Chsy3
ENSMUSG00000089943	12.1305	Ugt1a5
ENSMUSG00000032698	12.1246	Lmo2
ENSMUSG00000032698	12.1246	Lmo2
ENSMUSG00000032698	12.1246	Lmo2
ENSMUSG00000032698	12.1246	Lmo2
ENSMUSG00000036395	12.11	Glb1l2
ENSMUSG00000031217	12.0402	Efnb1
ENSMUSG00000032372	11.9759	Plscr2
ENSMUSG00000033717	11.9444	Adra2a
ENSMUSG00000027611	11.9214	Procr
ENSMUSG00000054728	11.9199	Phactr1
ENSMUSG00000040013	11.8744	Fkbp6
ENSMUSG00000060487	11.8499	Samd5
ENSMUSG00000000753	11.8389	Serpinf1
ENSMUSG00000051111	11.8377	Sv2c
ENSMUSG00000061527	11.8193	Krt5
ENSMUSG00000051043	11.8159	Gprc5c
ENSMUSG00000041333	11.7889	Mup4
ENSMUSG00000027338	11.7686	Prnd
ENSMUSG00000002900	11.7598	Lamb1
ENSMUSG00000052914	11.7591	Cyp2j6
ENSMUSG00000043885	11.7547	Slc36a4
ENSMUSG00000030020	11.7368	Prickle2
ENSMUSG00000030020	11.7368	Prickle2
ENSMUSG00000060508	11.6765	Nlrp9b
ENSMUSG00000004665	11.643	Cnn2
ENSMUSG00000090175	11.6186	Ugt1a9
ENSMUSG00000027947	11.5915	Il6ra
ENSMUSG00000031870	11.5767	Pgr
ENSMUSG00000032496	11.5664	Ltf
ENSMUSG00000040133	11.5531	Gpr176
ENSMUSG00000024500	11.5509	Ppp2r2b
ENSMUSG00000027966	11.5434	Col11a1
ENSMUSG00000027230	11.5075	Creb3l1
ENSMUSG00000037419	11.4997	Endod1
ENSMUSG00000040158	11.4875	Tax1bp3
ENSMUSG00000020176	11.4128	Grb10
ENSMUSG00000035517	11.3824	Tdrd7
ENSMUSG00000049577	11.3742	Zfpm1
ENSMUSG00000033498	11.37	Strc
ENSMUSG00000021536	11.3482	Adcy2
ENSMUSG00000041741	11.3365	Pde3a
ENSMUSG00000030020	11.3282	Prickle2
ENSMUSG00000030020	11.3282	Prickle2
ENSMUSG00000005107	11.2829	Slc2a9
ENSMUSG00000025219	11.2812	Fgf8
ENSMUSG00000045404	11.2807	Kcnk13
ENSMUSG00000045404	11.2807	Kcnk13
ENSMUSG00000045404	11.2807	Kcnk13
ENSMUSG00000089750	11.2763	NA
ENSMUSG00000033721	11.2729	Vav3
ENSMUSG00000034127	11.2696	Tspan8
ENSMUSG00000034127	11.2696	Tspan8
ENSMUSG00000031133	11.2674	Arhgef6
ENSMUSG00000046500	11.2652	Fam19a4
ENSMUSG00000060548	11.2368	Tnfrsf19
ENSMUSG00000021209	11.2004	Ppp4r4
ENSMUSG00000000247	11.1825	Lhx2
ENSMUSG00000043635	11.1751	Adamts3
ENSMUSG00000023039	11.1489	Krt7
ENSMUSG00000053846	11.1344	Lipg
ENSMUSG00000020176	11.1292	Grb10
ENSMUSG00000032374	11.1279	Plod2
ENSMUSG00000054555	11.1256	Adam12
ENSMUSG00000021213	11.1151	Akr1c13
ENSMUSG00000057836	11.111	Xlr3a
ENSMUSG00000090165	11.1067	Ugt1a10
ENSMUSG00000002384	11.0867	Bmp8b
ENSMUSG00000072949	11.0792	Acot1
ENSMUSG00000052656	11.071	Rnf103
ENSMUSG00000054034	11.0632	Tceal5
ENSMUSG00000078796	10.9905	Zfp541
ENSMUSG00000036198	10.9861	Arhgap36
ENSMUSG00000024172	10.9817	St6gal2
ENSMUSG00000054545	10.9817	Ugt1a6a
ENSMUSG00000090145	10.9817	Ugt1a6b
ENSMUSG00000002475	10.9795	Abhd3
ENSMUSG00000037892	10.9786	Pcdh18
ENSMUSG00000062980	10.9773	A430107O13Rik
ENSMUSG00000051236	10.9512	Msrb3
ENSMUSG00000060962	10.9179	Dmkn
ENSMUSG00000015053	10.9105	Gata2
ENSMUSG00000024921	10.8989	Smarca2
ENSMUSG00000015133	10.8472	Lrrk1
ENSMUSG00000087434	10.8292	Gm11202
ENSMUSG00000015501	10.8281	Hivep2
ENSMUSG00000032374	10.8066	Plod2
ENSMUSG00000000706	10.8015	Btn1a1
ENSMUSG00000059588	10.8002	Calcrl
ENSMUSG00000060548	10.7923	Tnfrsf19
ENSMUSG00000027848	10.7897	Olfml3
ENSMUSG00000043635	10.7882	Adamts3
ENSMUSG00000042540	10.7721	Acot5
ENSMUSG00000024921	10.7664	Smarca2
ENSMUSG00000020160	10.7283	Meis1
ENSMUSG00000071604	10.7252	Fam189a2
ENSMUSG00000047632	10.707	Fgfbp3
ENSMUSG00000031627	10.6967	Irf2
ENSMUSG00000027375	10.6959	Mal
ENSMUSG00000020990	10.6937	Cdkl1
ENSMUSG00000050737	10.6921	Ptges
ENSMUSG00000019230	10.6893	Lhx9
ENSMUSG00000051379	10.6886	Flrt3
ENSMUSG00000027434	10.6849	Nkx2-2
ENSMUSG00000018819	10.6805	Lsp1
ENSMUSG00000031849	10.657	Comp
ENSMUSG00000025892	10.6514	Gria4
ENSMUSG00000023159	10.6421	Psg29
ENSMUSG00000055737	10.6373	Ghr
ENSMUSG00000025432	10.6344	Avil
ENSMUSG00000028195	10.633	Cyr61
ENSMUSG00000027082	10.6199	Tfpi
ENSMUSG00000051379	10.6033	Flrt3
ENSMUSG00000089960	10.5948	Ugt1a1
ENSMUSG00000090171	10.5948	Ugt1a2
ENSMUSG00000022122	10.5864	Ednrb
ENSMUSG00000022122	10.5864	Ednrb
ENSMUSG00000007888	10.5777	Crlf1
ENSMUSG00000027200	10.5526	Sema6d
ENSMUSG00000051043	10.5516	Gprc5c
ENSMUSG00000022090	10.5434	Pdlim2
ENSMUSG00000026712	10.5328	Mrc1
ENSMUSG00000058396	10.5272	Gpr182
ENSMUSG00000060962	10.5215	Dmkn
ENSMUSG00000040432	10.5107	Ltb4r2
ENSMUSG00000051243	10.5088	Islr2
ENSMUSG00000051243	10.5087	Islr2
ENSMUSG00000051243	10.4937	Islr2
ENSMUSG00000027082	10.4919	Tfpi
ENSMUSG00000051243	10.4741	Islr2
ENSMUSG00000030361	10.4595	Klrb1a
ENSMUSG00000019880	10.4058	Rspo3
ENSMUSG00000025469	10.4058	Msx3
ENSMUSG00000031712	10.4058	Il15
ENSMUSG00000034634	10.4058	Ly6d
ENSMUSG00000051147	10.4058	Nat2
ENSMUSG00000051147	10.4058	Nat2
ENSMUSG00000040212	10.4054	Emp3
ENSMUSG00000060962	10.4053	Dmkn
ENSMUSG00000041361	10.4043	Gcom1
ENSMUSG00000038296	10.4036	Galntl4
ENSMUSG00000050640	10.4036	Tmem150c
ENSMUSG00000051243	10.4034	Islr2
ENSMUSG00000043099	10.4006	Hic1
ENSMUSG00000043099	10.4006	Hic1
ENSMUSG00000041377	10.3969	Ninj2
ENSMUSG00000029860	10.3969	Zyx
ENSMUSG00000079499	10.3925	6530402F18Rik
ENSMUSG00000052688	10.3881	5430435G22Rik
ENSMUSG00000054728	10.3881	Phactr1
ENSMUSG00000026141	10.3843	Col19a1
ENSMUSG00000021959	10.3766	Lats2
ENSMUSG00000046314	10.374	Stxbp6
ENSMUSG00000079037	10.361	Prnp
ENSMUSG00000051243	10.36	Islr2
ENSMUSG00000029287	10.3467	Tgfbr3
ENSMUSG00000041624	10.3443	Gucy1a2
ENSMUSG00000022824	10.338	Muc13
ENSMUSG00000041923	10.3361	Nol4
ENSMUSG00000051243	10.2977	Islr2
ENSMUSG00000052477	10.278	C130026I21Rik
ENSMUSG00000019775	10.2273	Rgs17
ENSMUSG00000016283	10.222	H2-M2
ENSMUSG00000041120	10.2197	Nbl1
ENSMUSG00000045838	10.2168	A430105I19Rik
ENSMUSG00000025219	10.2099	Fgf8
ENSMUSG00000025219	10.2099	Fgf8
ENSMUSG00000022383	10.1931	Ppara
ENSMUSG00000022383	10.1931	Ppara
ENSMUSG00000035451	10.1756	Foxa1
ENSMUSG00000030527	10.163	Crtc3
ENSMUSG00000074505	10.1579	Fat3
ENSMUSG00000027074	10.1541	Slc43a3
ENSMUSG00000023036	10.1272	Pcdhgc5
ENSMUSG00000023036	10.0837	Pcdhgc5
ENSMUSG00000027200	10.083	Sema6d
ENSMUSG00000027200	10.083	Sema6d
ENSMUSG00000027200	10.083	Sema6d
ENSMUSG00000027200	10.083	Sema6d
ENSMUSG00000050138	10.069	Kcnk12
ENSMUSG00000021250	10.0499	Fos
ENSMUSG00000021456	10.0337	Fbp2
ENSMUSG00000026185	10.0308	Igfbp5
ENSMUSG00000039198	10.0204	Ptchd3
ENSMUSG00000051043	10.0027	Gprc5c
ENSMUSG00000052477	9.96846	C130026I21Rik
ENSMUSG00000051243	9.96406	Islr2
ENSMUSG00000079049	9.95887	Serpinb1c
ENSMUSG00000044080	9.95296	S100a1
ENSMUSG00000027797	9.94576	Dclk1
ENSMUSG00000040690	9.94507	Col16a1
ENSMUSG00000019916	9.92819	P4ha1
ENSMUSG00000039239	9.92631	Tgfb2
ENSMUSG00000031790	9.84313	Mmp15
ENSMUSG00000036667	9.83477	Fam115a
ENSMUSG00000025578	9.83255	Cbx8
ENSMUSG00000037813	9.83211	D630003M21Rik
ENSMUSG00000049404	9.82769	Rarres1
ENSMUSG00000021622	9.82106	Ckmt2
ENSMUSG00000033965	9.80013	Slc16a2
ENSMUSG00000079355	9.79665	Ccrl1
ENSMUSG00000000938	9.77092	Hoxa10
ENSMUSG00000004633	9.76435	Chn2
ENSMUSG00000079843	9.74279	Gm15093
ENSMUSG00000029695	9.72802	Aass
ENSMUSG00000079029	9.70869	Gm2016
ENSMUSG00000034384	9.69626	Barhl2
ENSMUSG00000033578	9.6804	Tmem35
ENSMUSG00000025219	9.67421	Fgf8
ENSMUSG00000074968	9.6622	Ano3
ENSMUSG00000025743	9.6561	Sdc3
ENSMUSG00000038402	9.65104	Foxf2
ENSMUSG00000038855	9.63572	Itpkb
ENSMUSG00000050957	9.6232	Insl6
ENSMUSG00000032290	9.61894	Ptpn9
ENSMUSG00000035852	9.59142	9130017N09Rik
ENSMUSG00000030530	9.57401	Furin
ENSMUSG00000050315	9.56805	Synpo2
ENSMUSG00000045519	9.54178	Zfp560
ENSMUSG00000028370	9.54086	Pappa
ENSMUSG00000033882	9.53974	Rbm46
ENSMUSG00000026167	9.49055	Wnt10a
ENSMUSG00000034145	9.48722	Tmem63c
ENSMUSG00000022994	9.47748	Adcy6
ENSMUSG00000061353	9.44352	Cxcl12
ENSMUSG00000038917	9.43912	3930402G23Rik
ENSMUSG00000038267	9.42784	Slc22a23
ENSMUSG00000012429	9.42417	2810021B07Rik
ENSMUSG00000052821	9.39135	Cysltr1
ENSMUSG00000034687	9.35757	Fras1
ENSMUSG00000034683	9.35567	Ppp1r1c
ENSMUSG00000020154	9.34328	Ptprb
ENSMUSG00000051627	9.34041	Hist1h1e
ENSMUSG00000037788	9.33336	Vopp1
ENSMUSG00000030530	9.33152	Furin
ENSMUSG00000028015	9.30881	Ctso
ENSMUSG00000018378	9.30663	Cuedc1
ENSMUSG00000068547	9.29564	Clca6
ENSMUSG00000024789	9.29513	Jak2
ENSMUSG00000030790	9.27438	Adm
ENSMUSG00000028028	9.25401	Alpk1
ENSMUSG00000021852	9.24959	Slc35f4
ENSMUSG00000036594	9.24959	H2-Aa
ENSMUSG00000059434	9.24959	Gckr
ENSMUSG00000024526	9.24517	Cidea
ENSMUSG00000045555	9.24517	9030224M15Rik
ENSMUSG00000028255	9.24075	Clca3
ENSMUSG00000020890	9.2319	Gucy2e
ENSMUSG00000055912	9.19254	Tmem150a
ENSMUSG00000026121	9.18327	Sema4c
ENSMUSG00000071229	9.18158	Timm8a2
ENSMUSG00000020135	9.18119	Apc2
ENSMUSG00000027221	9.15428	Chst1
ENSMUSG00000061633	9.15422	1700029P11Rik
ENSMUSG00000050821	9.13353	Fam131a
ENSMUSG00000061524	9.13328	Zic2
ENSMUSG00000021190	9.1206	Lgmn
ENSMUSG00000042331	9.10985	Specc1
ENSMUSG00000039903	9.10506	4931408A02Rik
ENSMUSG00000000792	9.09436	Slc5a5
ENSMUSG00000048458	9.05886	6530418L21Rik
ENSMUSG00000022321	9.05468	Cdh10
ENSMUSG00000074968	9.03767	Ano3
ENSMUSG00000028525	9.0352	Pde4b
ENSMUSG00000028525	9.0352	Pde4b
ENSMUSG00000030170	9.02707	Wnt5b
ENSMUSG00000023328	9.02188	Ache
ENSMUSG00000041189	9.01923	Chrnb1
ENSMUSG00000021732	9.0179	Fgf10
ENSMUSG00000073810	9.01543	Ifnz
ENSMUSG00000060275	9.01447	Nrg2
ENSMUSG00000004633	9.01155	Chn2
ENSMUSG00000025608	9.00909	Podxl
ENSMUSG00000039782	9.00383	Cpeb2
ENSMUSG00000025544	8.99976	Tm9sf2
ENSMUSG00000047963	8.99899	Stbd1
ENSMUSG00000023868	8.99265	Pde10a
ENSMUSG00000054364	8.96622	Rhob
ENSMUSG00000058589	8.95722	Anks1b
ENSMUSG00000058589	8.95722	Anks1b
ENSMUSG00000048458	8.95387	6530418L21Rik
ENSMUSG00000041889	8.9376	Shisa4
ENSMUSG00000075703	8.93492	Ept1
ENSMUSG00000016262	8.92752	Sertad4
ENSMUSG00000004317	8.92729	Clcn5
ENSMUSG00000030123	8.91492	Plxnd1
ENSMUSG00000025938	8.91122	Slco5a1
ENSMUSG00000037887	8.90118	Dusp8
ENSMUSG00000045092	8.89625	S1pr1
ENSMUSG00000048022	8.89621	Tmem229a
ENSMUSG00000089738	8.88316	NA
ENSMUSG00000031103	8.88086	Elf4
ENSMUSG00000020122	8.86566	Egfr
ENSMUSG00000024789	8.86321	Jak2
ENSMUSG00000046731	8.85934	Kctd11
ENSMUSG00000017167	8.8353	Cntnap1
ENSMUSG00000079031	8.82435	BB287469
ENSMUSG00000068299	8.82182	1700019G17Rik
ENSMUSG00000040265	8.81657	Dnm3
ENSMUSG00000045378	8.81436	Pxt1
ENSMUSG00000045903	8.81325	Npas4
ENSMUSG00000030339	8.80179	Ltbr
ENSMUSG00000055737	8.80008	Ghr
ENSMUSG00000044903	8.79739	Psg22
ENSMUSG00000021108	8.7933	Prkch
ENSMUSG00000051599	8.78534	Pcdhb2
ENSMUSG00000025945	8.77512	Crygf
ENSMUSG00000028545	8.76686	Bend5
ENSMUSG00000072620	8.76297	Slfn2
ENSMUSG00000055945	8.76033	Prr18
ENSMUSG00000020226	8.72022	Slc5a4b
ENSMUSG00000038291	8.71764	Snx25
ENSMUSG00000018378	8.71541	Cuedc1
ENSMUSG00000049307	8.70228	Fut4
ENSMUSG00000028545	8.69929	Bend5
ENSMUSG00000046186	8.69048	Cd109
ENSMUSG00000045932	8.68254	Ifit2
ENSMUSG00000025777	8.67812	Gdap1
ENSMUSG00000074127	8.67812	Cmtm2a
ENSMUSG00000001497	8.6737	Pax9
ENSMUSG00000028551	8.6737	Cdkn2c
ENSMUSG00000000440	8.67149	Pparg
ENSMUSG00000000440	8.67149	Pparg
ENSMUSG00000074483	8.67149	Bglap
ENSMUSG00000026205	8.66928	Slc23a3
ENSMUSG00000034839	8.66928	Larp6
ENSMUSG00000037493	8.66928	Cib2
ENSMUSG00000047361	8.66486	Gm973
ENSMUSG00000048489	8.66486	8430408G22Rik
ENSMUSG00000048489	8.66486	8430408G22Rik
ENSMUSG00000064010	8.66486	Dppa1
ENSMUSG00000041165	8.66044	Spem1
ENSMUSG00000061517	8.6448	Sox21
ENSMUSG00000062760	8.61601	1810041L15Rik
ENSMUSG00000028965	8.6073	Tnfrsf9
ENSMUSG00000042104	8.59199	Uggt2
ENSMUSG00000024620	8.58448	Pdgfrb
ENSMUSG00000039209	8.5678	Rpl39l
ENSMUSG00000030562	8.55145	Nox4
ENSMUSG00000027338	8.54559	Prnd
ENSMUSG00000049128	8.54171	Ivl
ENSMUSG00000034438	8.52961	Gbp8
ENSMUSG00000000202	8.52862	Btbd17
ENSMUSG00000061353	8.49592	Cxcl12
ENSMUSG00000020122	8.49225	Egfr
ENSMUSG00000030492	8.48321	Slc7a9
ENSMUSG00000021760	8.4821	Gpx8
ENSMUSG00000024909	8.47693	Efemp2
ENSMUSG00000031074	8.44914	Fgf3
ENSMUSG00000042510	8.4351	AA986860
ENSMUSG00000063305	8.43457	Psg20
ENSMUSG00000019944	8.42906	Rhobtb1
ENSMUSG00000027797	8.4231	Dclk1
ENSMUSG00000024620	8.41868	Pdgfrb
ENSMUSG00000074486	8.41615	Bglap2
ENSMUSG00000044456	8.41413	Rin3
ENSMUSG00000030287	8.40642	Itpr2
ENSMUSG00000030287	8.40642	Itpr2
ENSMUSG00000025810	8.38567	Nrp1
ENSMUSG00000022176	8.37912	Rem2
ENSMUSG00000073805	8.37596	Fam196a
ENSMUSG00000024909	8.36547	Efemp2
ENSMUSG00000018819	8.36365	Lsp1
ENSMUSG00000004347	8.36144	Pde1c
ENSMUSG00000001510	8.3453	Dlx3
ENSMUSG00000034361	8.33352	Cpne2
ENSMUSG00000033880	8.32198	Lgals3bp
ENSMUSG00000029484	8.3046	Anxa3
ENSMUSG00000032366	8.29577	Tpm1
ENSMUSG00000026342	8.28857	Slc35f5
ENSMUSG00000024395	8.2883	Lims2
ENSMUSG00000022840	8.28793	Adcy5
ENSMUSG00000004508	8.28584	Gab2
ENSMUSG00000004508	8.28584	Gab2
ENSMUSG00000029161	8.28579	Cgref1
ENSMUSG00000041608	8.28388	Entpd3
ENSMUSG00000046879	8.27077	Irgm1
ENSMUSG00000037060	8.2462	Prkcdbp
ENSMUSG00000032366	8.23141	Tpm1
ENSMUSG00000024339	8.22912	Tap2
ENSMUSG00000019832	8.21741	Rab32
ENSMUSG00000034258	8.20319	Mfsd7c
ENSMUSG00000024503	8.20171	Spink3
ENSMUSG00000042156	8.19733	Dzip1
ENSMUSG00000032419	8.19586	Tbx18
ENSMUSG00000054568	8.1767	Dub1
ENSMUSG00000020432	8.17663	Tcn2
ENSMUSG00000027955	8.14488	Fam198b
ENSMUSG00000026077	8.14247	Npas2
ENSMUSG00000020432	8.14023	Tcn2
ENSMUSG00000043939	8.11565	A530064D06Rik
ENSMUSG00000043939	8.11565	A530064D06Rik
ENSMUSG00000061815	8.11107	Rufy4
ENSMUSG00000052392	8.10735	Acot4
ENSMUSG00000032310	8.10665	Cyp1a2
ENSMUSG00000074604	8.10223	Mgst2
ENSMUSG00000001020	8.09781	S100a4
ENSMUSG00000028132	8.09781	Tmem56
ENSMUSG00000039217	8.09781	Il18
ENSMUSG00000050063	8.09634	Klk6
ENSMUSG00000050063	8.09634	Klk6
ENSMUSG00000050063	8.09634	Klk6
ENSMUSG00000033174	8.0956	Mgll
ENSMUSG00000003746	8.09427	Man1a
ENSMUSG00000020848	8.09339	Doc2b
ENSMUSG00000049122	8.09339	Frmd3
ENSMUSG00000041625	8.09208	A2ld1
ENSMUSG00000021373	8.04765	Cap2
ENSMUSG00000038370	8.04208	Pcp4l1
ENSMUSG00000062991	8.03523	Nrg1
ENSMUSG00000035095	8.03087	Fam167a
ENSMUSG00000052160	8.01698	Pld4
ENSMUSG00000045679	8.01289	Pqlc3
ENSMUSG00000016262	8.01165	Sertad4
ENSMUSG00000035245	8.00322	A130022J15Rik
ENSMUSG00000068748	7.98258	Ptprz1
ENSMUSG00000026365	7.97946	Cfh
ENSMUSG00000041378	7.97467	Cldn5
ENSMUSG00000044456	7.96927	Rin3
ENSMUSG00000074918	7.96893	5430417L22Rik
ENSMUSG00000020805	7.96741	Slc13a5
ENSMUSG00000020098	7.94886	Pcbd1
ENSMUSG00000027356	7.94841	Fermt1
ENSMUSG00000032591	7.94776	Mst1
ENSMUSG00000027082	7.92473	Tfpi
ENSMUSG00000072572	7.89922	Slc39a2
ENSMUSG00000022747	7.89848	St3gal6
ENSMUSG00000074916	7.89135	Chst14
ENSMUSG00000029161	7.88744	Cgref1
ENSMUSG00000035910	7.88306	Dcdc2a
ENSMUSG00000039208	7.85774	Metrnl
ENSMUSG00000031227	7.84717	Magee1
ENSMUSG00000024497	7.8457	Pou4f3
ENSMUSG00000073549	7.83921	NA
ENSMUSG00000055945	7.83538	Prr18
ENSMUSG00000028128	7.83481	F3
ENSMUSG00000046856	7.83302	Gpr1
ENSMUSG00000000567	7.8284	Sox9
ENSMUSG00000002602	7.82628	Axl
ENSMUSG00000078625	7.81816	Gm12789
ENSMUSG00000044103	7.8104	Il1f9
ENSMUSG00000024034	7.80765	Tmprss3
ENSMUSG00000024034	7.80765	Tmprss3
ENSMUSG00000022306	7.80655	Zfpm2
ENSMUSG00000062713	7.80323	Sim2
ENSMUSG00000035513	7.80102	Ntng2
ENSMUSG00000035513	7.80102	Ntng2
ENSMUSG00000027868	7.80035	Tbx15
ENSMUSG00000060962	7.79842	Dmkn
ENSMUSG00000017493	7.79728	Igfbp4
ENSMUSG00000046818	7.79684	Ddit4l
ENSMUSG00000049281	7.79627	Scn3b
ENSMUSG00000051375	7.78257	Pcdh1
ENSMUSG00000021702	7.76903	Thbs4
ENSMUSG00000074195	7.75607	AI747448
ENSMUSG00000040694	7.75515	Apobec2
ENSMUSG00000022912	7.7409	Pros1
ENSMUSG00000049281	7.7403	Scn3b
ENSMUSG00000012350	7.73551	Ehf
ENSMUSG00000020432	7.73054	Tcn2
ENSMUSG00000049281	7.72637	Scn3b
ENSMUSG00000052675	7.71903	Zfp112
ENSMUSG00000026837	7.71485	Col5a1
ENSMUSG00000041449	7.70854	Serpina3h
ENSMUSG00000030834	7.7021	Abcc6
ENSMUSG00000014529	7.68374	4930511M11Rik
ENSMUSG00000031751	7.67939	Amfr
ENSMUSG00000039450	7.67648	Dcxr
ENSMUSG00000005873	7.66818	Reep5
ENSMUSG00000023186	7.66256	Vwa5a
ENSMUSG00000023186	7.66013	Vwa5a
ENSMUSG00000024053	7.65926	Emilin2
ENSMUSG00000049436	7.65926	Upk1b
ENSMUSG00000030413	7.62261	Pglyrp1
ENSMUSG00000071217	7.61519	BB287469
ENSMUSG00000032366	7.60558	Tpm1
ENSMUSG00000079031	7.60547	BB287469
ENSMUSG00000025504	7.60334	Eps8l2
ENSMUSG00000019775	7.60189	Rgs17
ENSMUSG00000041552	7.59015	Ptchd1
ENSMUSG00000026432	7.58794	Avpr1b
ENSMUSG00000036545	7.58783	Adamts2
ENSMUSG00000032366	7.58514	Tpm1
ENSMUSG00000078349	7.58367	AW011738
ENSMUSG00000079856	7.58059	NA
ENSMUSG00000061859	7.57543	Inadl
ENSMUSG00000050989	7.57201	Sepn1
ENSMUSG00000025701	7.54111	Alox5
ENSMUSG00000079479	7.53739	Gm9112
ENSMUSG00000073598	7.53518	1700066B19Rik
ENSMUSG00000037157	7.53076	Il22ra1
ENSMUSG00000033577	7.52731	Myo6
ENSMUSG00000023873	7.52634	1700010I14Rik
ENSMUSG00000040035	7.52487	Disp2
ENSMUSG00000031343	7.52348	Gabra3
ENSMUSG00000025213	7.52192	Kazald1
ENSMUSG00000049107	7.51861	Ntf3
ENSMUSG00000049107	7.51861	Ntf3
ENSMUSG00000054162	7.5175	Spock3
ENSMUSG00000022580	7.51509	Rhpn1
ENSMUSG00000033016	7.51485	Nfatc1
ENSMUSG00000020218	7.50424	Wif1
ENSMUSG00000021214	7.50424	Akr1c18
ENSMUSG00000036158	7.5023	Prickle1
ENSMUSG00000000094	7.49723	Tbx4
ENSMUSG00000031647	7.48331	Mfap3l
ENSMUSG00000031647	7.48331	Mfap3l
ENSMUSG00000033542	7.45444	Arhgef5
ENSMUSG00000000094	7.44933	Tbx4
ENSMUSG00000022296	7.43636	Baalc
ENSMUSG00000017707	7.43334	Serinc3
ENSMUSG00000029103	7.42779	Lrpap1
ENSMUSG00000022707	7.4238	Gbe1
ENSMUSG00000022580	7.41638	Rhpn1
ENSMUSG00000058620	7.40988	Adra2b
ENSMUSG00000001986	7.40875	Gria3
ENSMUSG00000026829	7.40376	Gbgt1
ENSMUSG00000035200	7.39534	Chrnb4
ENSMUSG00000039339	7.39503	2010001E11Rik
ENSMUSG00000022562	7.39151	Oplah
ENSMUSG00000020841	7.38795	Cpd
ENSMUSG00000073599	7.3837	Ecscr
ENSMUSG00000059246	7.3787	Foxb1
ENSMUSG00000064224	7.37684	Gsdma3
ENSMUSG00000020299	7.37353	4930524B15Rik
ENSMUSG00000022790	7.37243	Igsf11
ENSMUSG00000079034	7.37018	Gm8300
ENSMUSG00000020728	7.36966	Ccdc46
ENSMUSG00000046056	7.36893	Sbsn
ENSMUSG00000048142	7.34259	Nat8l
ENSMUSG00000058656	7.32259	Samd12
ENSMUSG00000048915	7.316	Efna5
ENSMUSG00000033016	7.30852	Nfatc1
ENSMUSG00000045589	7.29396	6430704M03Rik
ENSMUSG00000074639	7.28709	BC089597
ENSMUSG00000040711	7.25658	Sh3pxd2b
ENSMUSG00000042359	7.25339	Osbpl6
ENSMUSG00000021822	7.24109	Plau
ENSMUSG00000005087	7.23772	Cd44
ENSMUSG00000005087	7.23772	Cd44
ENSMUSG00000005087	7.23772	Cd44
ENSMUSG00000057143	7.23751	Trim12c
ENSMUSG00000072214	7.23113	Sept5
ENSMUSG00000058420	7.22956	Syt17
ENSMUSG00000049001	7.2185	A930038C07Rik
ENSMUSG00000033182	7.21629	Kbtbd12
ENSMUSG00000019838	7.20763	Slc16a10
ENSMUSG00000053819	7.20726	Camk2d
ENSMUSG00000029861	7.20503	Fam131b
ENSMUSG00000000617	7.20376	Grm6
ENSMUSG00000031253	7.18589	Srpx2
ENSMUSG00000031253	7.18589	Srpx2
ENSMUSG00000021281	7.18147	Tnfaip2
ENSMUSG00000035783	7.16787	Acta2
ENSMUSG00000051323	7.15675	Pcdh19
ENSMUSG00000017817	7.15529	Jph2
ENSMUSG00000027447	7.14472	Cst3
ENSMUSG00000048562	7.14163	Sp8
ENSMUSG00000079550	7.14123	Mpp4
ENSMUSG00000048915	7.13101	Efna5
ENSMUSG00000022636	7.10585	Alcam
ENSMUSG00000025396	7.10143	Hsd17b6
ENSMUSG00000029019	7.0992	Nppb
ENSMUSG00000020062	7.08116	Slc5a8
ENSMUSG00000005087	7.07192	Cd44
ENSMUSG00000044197	7.06394	Gpr146
ENSMUSG00000031202	7.05414	Rab39b
ENSMUSG00000030208	7.05325	Emp1
ENSMUSG00000046982	7.04875	Tshz1
ENSMUSG00000022454	7.04517	Nell2
ENSMUSG00000026728	7.04026	Vim
ENSMUSG00000026748	7.02727	Plxdc2
ENSMUSG00000043068	7.02496	Fam89a
ENSMUSG00000038910	7.01876	Plcl2
ENSMUSG00000026786	7.01857	Apbb1ip
ENSMUSG00000038740	7.00712	Fam125b
ENSMUSG00000029470	7.00703	P2rx4
ENSMUSG00000027562	6.98749	Car2
ENSMUSG00000061859	6.98604	Inadl
ENSMUSG00000042453	6.98251	Reln
ENSMUSG00000033960	6.98192	9430020K01Rik
ENSMUSG00000029646	6.97977	Cdx2
ENSMUSG00000029189	6.95514	Sel1l3
ENSMUSG00000031647	6.9545	Mfap3l
ENSMUSG00000051000	6.95418	Fam160a1
ENSMUSG00000051323	6.95141	Pcdh19
ENSMUSG00000031824	6.95045	6430548M08Rik
ENSMUSG00000061815	6.95045	Rufy4
ENSMUSG00000052870	6.94603	NA
ENSMUSG00000039579	6.94161	Grin3a
ENSMUSG00000044086	6.94161	Lmod3
ENSMUSG00000085628	6.94161	D630032N06Rik
ENSMUSG00000015970	6.93989	Chdh
ENSMUSG00000015970	6.93989	Chdh
ENSMUSG00000015970	6.93989	Chdh
ENSMUSG00000022432	6.9394	Smc1b
ENSMUSG00000037868	6.9388	Egr2
ENSMUSG00000005649	6.93719	Cabp5
ENSMUSG00000028949	6.93719	Smarcd3
ENSMUSG00000047976	6.93719	Kcna1
ENSMUSG00000047990	6.93719	C2cd4a
ENSMUSG00000051920	6.93719	Rspo2
ENSMUSG00000054150	6.93719	4831426I19Rik
ENSMUSG00000044197	6.93596	Gpr146
ENSMUSG00000005640	6.93498	Insrr
ENSMUSG00000025002	6.93277	Cyp2c55
ENSMUSG00000026322	6.93277	Htr4
ENSMUSG00000033715	6.93277	Akr1c14
ENSMUSG00000035775	6.9313	Krt20
ENSMUSG00000041794	6.92982	Myrip
ENSMUSG00000014813	6.92835	Stc1
ENSMUSG00000027380	6.92835	Acoxl
ENSMUSG00000034813	6.92823	Grip1
ENSMUSG00000024663	6.92143	Rab3il1
ENSMUSG00000035279	6.92046	A430110N23Rik
ENSMUSG00000030223	6.91951	Ptpro
ENSMUSG00000014361	6.91174	Mertk
ENSMUSG00000031111	6.89031	Igsf1
ENSMUSG00000049521	6.88385	Cdc42ep1
ENSMUSG00000031358	6.86864	Msl3
ENSMUSG00000020486	6.85549	Sept4
ENSMUSG00000031886	6.84491	Ces2e
ENSMUSG00000031886	6.84491	Ces2e
ENSMUSG00000031639	6.84195	Tlr3
ENSMUSG00000038156	6.839	Spon1
ENSMUSG00000039552	6.82574	Rsph4a
ENSMUSG00000031775	6.82539	Pllp
ENSMUSG00000032537	6.82467	Ephb1
ENSMUSG00000005087	6.82416	Cd44
ENSMUSG00000022102	6.81567	Dok2
ENSMUSG00000032122	6.8076	Slc37a2
ENSMUSG00000051343	6.79986	Rab11fip5
ENSMUSG00000061740	6.77902	Cyp2d22
ENSMUSG00000061740	6.77902	Cyp2d22
ENSMUSG00000046480	6.77518	Scn4b
ENSMUSG00000033016	6.76729	Nfatc1
ENSMUSG00000032584	6.74817	Mst1r
ENSMUSG00000021228	6.74641	Acot3
ENSMUSG00000049625	6.74081	Tifab
ENSMUSG00000032948	6.73952	Lipi
ENSMUSG00000061859	6.7376	Inadl
ENSMUSG00000070421	6.73344	Olfr658
ENSMUSG00000061353	6.73312	Cxcl12
ENSMUSG00000024781	6.71727	Lipa
ENSMUSG00000063564	6.71424	Col23a1
ENSMUSG00000035778	6.71125	Ggta1
ENSMUSG00000078153	6.71063	Psme2b-ps
ENSMUSG00000065308	6.70949	U1
ENSMUSG00000079859	6.70769	Gm13275
ENSMUSG00000032122	6.70269	Slc37a2
ENSMUSG00000028173	6.69495	Wls
ENSMUSG00000028965	6.69343	Tnfrsf9
ENSMUSG00000053897	6.69312	Slc39a8
ENSMUSG00000057123	6.68778	Gja5
ENSMUSG00000024063	6.68601	Lbh
ENSMUSG00000057143	6.67289	Trim12c
ENSMUSG00000035778	6.67089	Ggta1
ENSMUSG00000026114	6.66735	Cnga3
ENSMUSG00000020875	6.6613	Hoxb9
ENSMUSG00000001349	6.66091	Cnn1
ENSMUSG00000030909	6.6598	Anks4b
ENSMUSG00000078921	6.65698	Tgtp2
ENSMUSG00000028755	6.64925	Cda
ENSMUSG00000053819	6.64763	Camk2d
ENSMUSG00000030897	6.64704	Cnga4
ENSMUSG00000063060	6.64587	Sox7
ENSMUSG00000054003	6.64483	Tdrd9
ENSMUSG00000074923	6.64008	Pak6
ENSMUSG00000014602	6.63754	Kif1a
ENSMUSG00000004540	6.63338	Psg17
ENSMUSG00000014602	6.62622	Kif1a
ENSMUSG00000045314	6.60576	Ankrd56
ENSMUSG00000074502	6.60491	Ubtfl1
ENSMUSG00000020674	6.60306	Pxdn
ENSMUSG00000041607	6.59954	Mbp
ENSMUSG00000071379	6.58889	Hpcal1
ENSMUSG00000036256	6.58876	Igfbp7
ENSMUSG00000070837	6.58685	Aurkc
ENSMUSG00000033016	6.58523	Nfatc1
ENSMUSG00000000805	6.58007	Car4
ENSMUSG00000055128	6.57184	Cgrrf1
ENSMUSG00000026173	6.57126	Plcd4
ENSMUSG00000074783	6.57119	AU019990
ENSMUSG00000047414	6.56894	Flrt2
ENSMUSG00000024781	6.56253	Lipa
ENSMUSG00000053897	6.56063	Slc39a8
ENSMUSG00000073858	6.55825	Itpripl2
ENSMUSG00000055172	6.55498	C1ra
ENSMUSG00000037621	6.54737	Atoh8
ENSMUSG00000047307	6.54522	Pcdhb13
ENSMUSG00000019230	6.54117	Lhx9
ENSMUSG00000069733	6.54016	Ube2u
ENSMUSG00000047786	6.53857	Lix1
ENSMUSG00000005087	6.52647	Cd44
ENSMUSG00000019866	6.52623	Aim1
ENSMUSG00000021087	6.52606	Rtn1
ENSMUSG00000074122	6.52361	Foxl2os
ENSMUSG00000026509	6.50441	Capn2
ENSMUSG00000034690	6.50246	Nlrp4c
ENSMUSG00000075254	6.49621	Heg1
ENSMUSG00000032418	6.49462	Me1
ENSMUSG00000028494	6.49374	Plin2
ENSMUSG00000004698	6.48532	Hdac9
ENSMUSG00000032537	6.47913	Ephb1
ENSMUSG00000029861	6.47648	Fam131b
ENSMUSG00000053897	6.47422	Slc39a8
ENSMUSG00000001751	6.45973	Naglu
ENSMUSG00000025993	6.44645	Slc40a1
ENSMUSG00000034981	6.44273	Parm1
ENSMUSG00000000957	6.44084	Mmp14
ENSMUSG00000042821	6.43776	Snai1
ENSMUSG00000051851	6.4309	Cxx1c
ENSMUSG00000036862	6.42671	Dchs1
ENSMUSG00000028965	6.41791	Tnfrsf9
ENSMUSG00000045934	6.40467	Mtmr11
ENSMUSG00000061013	6.40267	Mkx
ENSMUSG00000028600	6.40106	Podn
ENSMUSG00000049624	6.39829	Slc17a5
ENSMUSG00000031557	6.39478	Plekha2
ENSMUSG00000033737	6.39424	Fndc3c1
ENSMUSG00000022175	6.38093	Lrp10
ENSMUSG00000030352	6.3797	Tspan9
ENSMUSG00000024154	6.37898	Gtf2a1l
ENSMUSG00000036913	6.36667	Trim67
ENSMUSG00000022475	6.36658	Hdac7
ENSMUSG00000074577	6.36572	Fam65c
ENSMUSG00000040998	6.36183	Npnt
ENSMUSG00000009356	6.3613	Lpo
ENSMUSG00000079494	6.3613	Cml5
ENSMUSG00000087189	6.3613	D130017N08Rik
ENSMUSG00000054150	6.35969	4831426I19Rik
ENSMUSG00000072952	6.35909	Gm5878
ENSMUSG00000043999	6.35854	Gpr75
ENSMUSG00000038242	6.35814	Aox4
ENSMUSG00000031273	6.35688	Col4a6
ENSMUSG00000032380	6.35688	Dapk2
ENSMUSG00000040121	6.35688	Rep15
ENSMUSG00000044220	6.35688	Nkx2-3
ENSMUSG00000055197	6.35688	Fev
ENSMUSG00000065369	6.35688	U1
ENSMUSG00000065546	6.35688	Mir196a-1
ENSMUSG00000074768	6.35688	Bhmt
ENSMUSG00000058147	6.35582	Xlr3c
ENSMUSG00000027524	6.35393	Edn3
ENSMUSG00000005803	6.35246	Sqrdl
ENSMUSG00000036510	6.35246	Cdh8
ENSMUSG00000036510	6.35246	Cdh8
ENSMUSG00000065294	6.35136	U1
ENSMUSG00000022340	6.34804	Sybu
ENSMUSG00000044309	6.34691	Apol7c
ENSMUSG00000079057	6.34362	Cyp4v3
ENSMUSG00000022240	6.34236	Ctnnd2
ENSMUSG00000073476	6.33042	Gm10516
ENSMUSG00000072923	6.31432	Gm10439
ENSMUSG00000026621	6.31147	Mosc1
ENSMUSG00000074923	6.30808	Pak6
ENSMUSG00000025545	6.30674	Clybl
ENSMUSG00000035697	6.29316	Hmha1
ENSMUSG00000037379	6.27872	Spon2
ENSMUSG00000018648	6.27854	Dusp14
ENSMUSG00000078235	6.27524	Fam43b
ENSMUSG00000022091	6.27171	Sorbs3
ENSMUSG00000040998	6.27116	Npnt
ENSMUSG00000034813	6.24878	Grip1
ENSMUSG00000058976	6.24467	Usp17l5
ENSMUSG00000022055	6.2437	Nefl
ENSMUSG00000032625	6.23892	Thsd7a
ENSMUSG00000020205	6.23606	Phlda1
ENSMUSG00000027560	6.23551	Dok5
ENSMUSG00000003992	6.23033	Ssbp2
ENSMUSG00000026173	6.2273	Plcd4
ENSMUSG00000006731	6.22619	B4galnt1
ENSMUSG00000053819	6.22339	Camk2d
ENSMUSG00000025473	6.22048	Adam8
ENSMUSG00000023964	6.21586	Calcr
ENSMUSG00000021843	6.21314	Ktn1
ENSMUSG00000040265	6.2118	Dnm3
ENSMUSG00000070889	6.20761	Pgap1
ENSMUSG00000032315	6.20143	Cyp1a1
ENSMUSG00000049755	6.1955	Zfp672
ENSMUSG00000043388	6.19519	Tmem130
ENSMUSG00000047557	6.19237	Lxn
ENSMUSG00000001773	6.17818	Folh1
ENSMUSG00000079362	6.17653	Gbp6
ENSMUSG00000020009	6.17186	Ifngr1
ENSMUSG00000021065	6.16875	Fut8
ENSMUSG00000074199	6.16344	Krtdap
ENSMUSG00000064246	6.16197	Chi3l1
ENSMUSG00000032366	6.15932	Tpm1
ENSMUSG00000035692	6.15779	Isg15
ENSMUSG00000035697	6.15558	Hmha1
ENSMUSG00000045679	6.1464	Pqlc3
ENSMUSG00000041607	6.14591	Mbp
ENSMUSG00000043432	6.1459	Leng9
ENSMUSG00000036339	6.13686	6720456H20Rik
ENSMUSG00000022483	6.13288	Col2a1
ENSMUSG00000004085	6.13266	B230120H23Rik
ENSMUSG00000002020	6.13059	Ltbp2
ENSMUSG00000022074	6.12209	Tnfrsf10b
ENSMUSG00000054934	6.11739	Kcnmb4
ENSMUSG00000034871	6.10777	Fam151a
ENSMUSG00000000142	6.1065	Axin2
ENSMUSG00000027217	6.10381	Tspan18
ENSMUSG00000079197	6.09677	Psme2
ENSMUSG00000046794	6.091	Ppp1r3b
ENSMUSG00000073795	6.08872	6430531B16Rik
ENSMUSG00000053302	6.07883	NA
ENSMUSG00000079055	6.07883	Slc8a3
ENSMUSG00000010529	6.07557	Gm266
ENSMUSG00000086635	6.07483	4932415G12Rik
ENSMUSG00000039110	6.07115	Mycbpap
ENSMUSG00000050541	6.0701	Adra1b
ENSMUSG00000004347	6.06967	Pde1c
ENSMUSG00000004347	6.06967	Pde1c
ENSMUSG00000041453	6.06673	Rpl21
ENSMUSG00000055707	6.06623	Klhl26
ENSMUSG00000056812	6.06497	St8sia3
ENSMUSG00000039391	6.06452	Ccdc81
ENSMUSG00000042834	6.06047	D0H4S114
ENSMUSG00000079428	6.05788	Tceal7
ENSMUSG00000029408	6.05358	Abcb9
ENSMUSG00000054871	6.04798	Tmem158
ENSMUSG00000025647	6.04308	Shisa5
ENSMUSG00000049532	6.0424	Sall2
ENSMUSG00000026630	6.0394	Batf3
ENSMUSG00000042834	6.03689	D0H4S114
ENSMUSG00000028799	6.03482	Zfp362
ENSMUSG00000006731	6.02901	B4galnt1
ENSMUSG00000022131	6.02892	Gpr180
ENSMUSG00000073409	6.02635	H2-Q6
ENSMUSG00000033039	6.02455	Micall1
ENSMUSG00000089878	6.01488	NA
ENSMUSG00000042834	6.01388	D0H4S114
ENSMUSG00000019230	6.01363	Lhx9
ENSMUSG00000046169	6.01223	Adamts6
ENSMUSG00000020836	6.00958	Coro6
ENSMUSG00000090172	6.0085	NA
ENSMUSG00000047117	6.0085	Ankdd1b
ENSMUSG00000038843	6.00579	Gcnt1
ENSMUSG00000045664	6.00192	Cdc42ep2
ENSMUSG00000021703	6.00121	Serinc5
ENSMUSG00000041012	5.99524	Cmtm8
ENSMUSG00000021226	5.98807	Acot2
ENSMUSG00000021477	5.98802	Ctsl
ENSMUSG00000036596	5.98749	Cpz
ENSMUSG00000031021	5.98178	Tmem9b
ENSMUSG00000042807	5.97738	Hecw2
ENSMUSG00000027983	5.97443	Cyp2u1
ENSMUSG00000019850	5.97314	Tnfaip3
ENSMUSG00000039007	5.97148	Pgcp
ENSMUSG00000073062	5.96964	Zxdb
ENSMUSG00000048482	5.96863	Bdnf
ENSMUSG00000072878	5.96743	1700123L14Rik
ENSMUSG00000070999	5.96559	Ccin
ENSMUSG00000073591	5.96505	Pcdhb22
ENSMUSG00000042500	5.96299	Eif2c4
ENSMUSG00000031340	5.96262	Gabre
ENSMUSG00000039611	5.96063	2810432L12Rik
ENSMUSG00000025558	5.95584	Dock9
ENSMUSG00000040016	5.95525	Ptger3
ENSMUSG00000025558	5.95443	Dock9
ENSMUSG00000042834	5.95215	D0H4S114
ENSMUSG00000074250	5.94786	Gm10653
ENSMUSG00000063410	5.94751	Stk24
ENSMUSG00000006390	5.94389	Elovl1
ENSMUSG00000067916	5.94362	Gm13139
ENSMUSG00000036330	5.94168	Slc18a1
ENSMUSG00000026223	5.94093	Itm2c
ENSMUSG00000034456	5.93804	Uroc1
ENSMUSG00000025558	5.9321	Dock9
ENSMUSG00000075728	5.93104	U1
ENSMUSG00000067438	5.91391	Hmx1
ENSMUSG00000070605	5.91323	Gm13251
ENSMUSG00000031431	5.90605	Tsc22d3
ENSMUSG00000037580	5.90501	Gch1
ENSMUSG00000058806	5.90223	Col13a1
ENSMUSG00000027376	5.89705	Prom2
ENSMUSG00000027376	5.89705	Prom2
ENSMUSG00000020323	5.89529	Prss57
ENSMUSG00000073012	5.89	Fnd3c2
ENSMUSG00000001240	5.88991	Ramp2
ENSMUSG00000021583	5.88345	Erap1
ENSMUSG00000074489	5.88253	Bglap-rs1
ENSMUSG00000033594	5.87624	Spata2L
ENSMUSG00000051910	5.86583	Sox6
ENSMUSG00000022220	5.86519	Adcy4
ENSMUSG00000020068	5.86194	Pbld2
ENSMUSG00000018102	5.85503	Hist1h2bc
ENSMUSG00000054640	5.85457	Slc8a1
ENSMUSG00000054640	5.85457	Slc8a1
ENSMUSG00000036292	5.84911	Gramd1c
ENSMUSG00000062260	5.8482	AA415398
ENSMUSG00000019975	5.84368	Ikbip
ENSMUSG00000074364	5.84184	Ehd2
ENSMUSG00000060512	5.84168	0610040J01Rik
ENSMUSG00000004872	5.83618	Pax3
ENSMUSG00000026413	5.831	Pkp1
ENSMUSG00000003992	5.82512	Ssbp2
ENSMUSG00000032503	5.81765	Arpp21
ENSMUSG00000038751	5.81512	Ptk6
ENSMUSG00000035435	5.81245	Abca17
ENSMUSG00000073125	5.80945	Xlr3b
ENSMUSG00000005474	5.79646	Myl10
ENSMUSG00000005474	5.79646	Myl10
ENSMUSG00000051503	5.79425	Gm6583
ENSMUSG00000074063	5.78983	Osgin1
ENSMUSG00000028327	5.78762	1300002K09Rik
ENSMUSG00000078922	5.78652	Tgtp1
ENSMUSG00000031493	5.78541	Ggn
ENSMUSG00000038765	5.78541	Lmx1b
ENSMUSG00000051251	5.78541	Nhlh1
ENSMUSG00000056854	5.78541	Pou3f4
ENSMUSG00000048772	5.78431	Tmem53
ENSMUSG00000062007	5.78431	Hsh2d
ENSMUSG00000010175	5.78394	Prox1
ENSMUSG00000023140	5.78394	Reg2
ENSMUSG00000037139	5.7832	Myom3
ENSMUSG00000031662	5.78099	Snx20
ENSMUSG00000042662	5.78099	Dusp15
ENSMUSG00000048138	5.78099	Dmrt2
ENSMUSG00000049107	5.78099	Ntf3
ENSMUSG00000050063	5.78099	Klk6
ENSMUSG00000036923	5.78011	Stox1
ENSMUSG00000022875	5.77878	Kng1
ENSMUSG00000028337	5.77714	Coro2a
ENSMUSG00000026601	5.77657	9430070O13Rik
ENSMUSG00000027833	5.77657	Shox2
ENSMUSG00000037996	5.77657	Slc24a2
ENSMUSG00000037996	5.77657	Slc24a2
ENSMUSG00000038253	5.77657	Hoxa5
ENSMUSG00000056258	5.77657	Kcnq3
ENSMUSG00000069378	5.77657	Prdm6
ENSMUSG00000036139	5.77215	Hoxc9
ENSMUSG00000084845	5.77215	Gm5151
ENSMUSG00000051154	5.77202	Commd3
ENSMUSG00000049922	5.76988	Slc35c1
ENSMUSG00000029298	5.76948	Gbp9
ENSMUSG00000071335	5.76425	G630090E17Rik
ENSMUSG00000070354	5.76344	Evi2b
ENSMUSG00000070354	5.76344	Evi2b
ENSMUSG00000034813	5.76121	Grip1
ENSMUSG00000037428	5.75871	Vgf
ENSMUSG00000055707	5.75652	Klhl26
ENSMUSG00000022483	5.75557	Col2a1
ENSMUSG00000006390	5.75127	Elovl1
ENSMUSG00000034320	5.74746	Slc26a2
ENSMUSG00000044288	5.74703	Cnr1
ENSMUSG00000054266	5.74112	Serpinb9d
ENSMUSG00000062184	5.73236	Hs6st2
ENSMUSG00000024247	5.73168	Pkdcc
ENSMUSG00000021662	5.72007	Rgnef
ENSMUSG00000022180	5.71382	Slc7a8
ENSMUSG00000089644	5.71068	NA
ENSMUSG00000089903	5.71068	NA
ENSMUSG00000050965	5.70902	Prkca
ENSMUSG00000035357	5.69867	Pdzrn3
ENSMUSG00000052085	5.68191	Dock8
ENSMUSG00000034112	5.67985	Atp2c2
ENSMUSG00000024381	5.67874	Bin1
ENSMUSG00000028351	5.67725	Dbc1
ENSMUSG00000020836	5.6667	Coro6
ENSMUSG00000028073	5.66272	Pear1
ENSMUSG00000028073	5.66272	Pear1
ENSMUSG00000028073	5.66272	Pear1
ENSMUSG00000028073	5.66272	Pear1
ENSMUSG00000079031	5.6616	BB287469
ENSMUSG00000009281	5.65963	Rarres2
ENSMUSG00000029156	5.65767	Sgcb
ENSMUSG00000023964	5.65759	Calcr
ENSMUSG00000028337	5.65735	Coro2a
ENSMUSG00000027684	5.64365	Mecom
ENSMUSG00000030077	5.64034	Chl1
ENSMUSG00000057329	5.63084	Bcl2
ENSMUSG00000070448	5.60925	Vmn2r89
ENSMUSG00000070448	5.60925	Vmn2r89
ENSMUSG00000049922	5.60442	Slc35c1
ENSMUSG00000035296	5.6038	Sgcg
ENSMUSG00000039989	5.59608	Cbx4
ENSMUSG00000026401	5.59547	Daf2
ENSMUSG00000039031	5.5884	Arhgap18
ENSMUSG00000028457	5.58756	Atp8b5
ENSMUSG00000019850	5.58737	Tnfaip3
ENSMUSG00000044365	5.58608	Cxxc4
ENSMUSG00000039007	5.58461	Pgcp
ENSMUSG00000052684	5.58433	Jun
ENSMUSG00000002881	5.578	Nab1
ENSMUSG00000087023	5.57577	1110020A21Rik
ENSMUSG00000032315	5.57319	Cyp1a1
ENSMUSG00000035187	5.57067	Nkx6-1
ENSMUSG00000032366	5.57052	Tpm1
ENSMUSG00000028989	5.56802	Angptl7
ENSMUSG00000034377	5.56294	Tulp4
ENSMUSG00000033227	5.56055	Wnt6
ENSMUSG00000032366	5.55973	Tpm1
ENSMUSG00000020793	5.55848	Galr2
ENSMUSG00000020023	5.55781	Tmcc3
ENSMUSG00000020023	5.55781	Tmcc3
ENSMUSG00000021939	5.55654	Ctsb
ENSMUSG00000079459	5.55147	A530032D15Rik
ENSMUSG00000031875	5.55071	Cmtm3
ENSMUSG00000019790	5.54442	Stxbp5
ENSMUSG00000034377	5.54183	Tulp4
ENSMUSG00000022577	5.53734	Ly6h
ENSMUSG00000074649	5.53464	BC029722
ENSMUSG00000024664	5.52802	Fads3
ENSMUSG00000073386	5.52463	9830107B12Rik
ENSMUSG00000073386	5.52463	9830107B12Rik
ENSMUSG00000073386	5.52463	9830107B12Rik
ENSMUSG00000048347	5.52379	Pcdhb18
ENSMUSG00000029314	5.517	Agpat9
ENSMUSG00000078962	5.51497	4932414J04Rik
ENSMUSG00000000560	5.51478	Gabra2
ENSMUSG00000073802	5.51424	Cdkn2b
ENSMUSG00000018920	5.50798	Cxcl16
ENSMUSG00000027861	5.50215	Casq2
ENSMUSG00000063268	5.49936	Parp10
ENSMUSG00000037363	5.49443	Letm2
ENSMUSG00000070243	5.49415	U3
ENSMUSG00000070251	5.49415	U3
ENSMUSG00000070251	5.49415	U3
ENSMUSG00000070251	5.49415	U3
ENSMUSG00000020419	5.49378	Hormad2
ENSMUSG00000020150	5.49157	Gamt
ENSMUSG00000020712	5.49084	Tcam1
ENSMUSG00000029279	5.49084	Brdt
ENSMUSG00000060176	5.49084	Kif27
ENSMUSG00000037999	5.48999	Arap2
ENSMUSG00000019899	5.48863	Lama2
ENSMUSG00000040600	5.48642	Eps8l3
ENSMUSG00000006390	5.48242	Elovl1
ENSMUSG00000023267	5.47979	Gabrr2
ENSMUSG00000021986	5.47535	Fam123a
ENSMUSG00000009376	5.46855	Met
ENSMUSG00000063268	5.46419	Parp10
ENSMUSG00000055069	5.45939	Rab39
ENSMUSG00000058669	5.45821	Nkx2-9
ENSMUSG00000024598	5.45521	Fbn2
ENSMUSG00000018750	5.44599	Zbtb4
ENSMUSG00000070803	5.44353	Cited4
ENSMUSG00000013846	5.44122	St3gal1
ENSMUSG00000038843	5.4386	Gcnt1
ENSMUSG00000038843	5.4386	Gcnt1
ENSMUSG00000030688	5.4385	Stard10
ENSMUSG00000041481	5.43634	Serpina3g
ENSMUSG00000004798	5.43579	Ulk2
ENSMUSG00000051910	5.4306	Sox6
ENSMUSG00000028007	5.42051	Snx7
ENSMUSG00000034000	5.41268	Neu4
ENSMUSG00000053765	5.4118	Oas1f
ENSMUSG00000049721	5.40865	Gal3st1
ENSMUSG00000042607	5.40857	Asb4
ENSMUSG00000001655	5.40767	Hoxc13
ENSMUSG00000031376	5.40762	Atp2b3
ENSMUSG00000067916	5.39919	Gm13139
ENSMUSG00000015452	5.39854	Ager
ENSMUSG00000010461	5.39707	Eya4
ENSMUSG00000024810	5.39608	Il33
ENSMUSG00000048376	5.39451	F2r
ENSMUSG00000037353	5.39133	Letmd1
ENSMUSG00000031434	5.3878	Morc4
ENSMUSG00000049090	5.38674	Zadh2
ENSMUSG00000036242	5.38473	3632451O06Rik
ENSMUSG00000041620	5.3838	Mmp1b
ENSMUSG00000053012	5.38111	Krcc1
ENSMUSG00000038349	5.38034	Plcl1
ENSMUSG00000022048	5.37963	Dpysl2
ENSMUSG00000031179	5.3792	3830417A13Rik
ENSMUSG00000029166	5.37244	Mapre3
ENSMUSG00000028007	5.37141	Snx7
ENSMUSG00000040990	5.36727	Sh3kbp1
ENSMUSG00000039629	5.36532	Fam40b
ENSMUSG00000026872	5.36331	Zeb2
ENSMUSG00000032394	5.35663	Igdcc3
ENSMUSG00000041737	5.35583	Tmem45b
ENSMUSG00000028926	5.3549	Cdk14
ENSMUSG00000021573	5.34797	Tppp
ENSMUSG00000019647	5.34739	Sema6a
ENSMUSG00000030847	5.34733	Bag3
ENSMUSG00000051910	5.34355	Sox6
ENSMUSG00000040310	5.33417	Alx4
ENSMUSG00000028860	5.33119	Sytl1
ENSMUSG00000004085	5.3299	B230120H23Rik
ENSMUSG00000037111	5.32515	Setd7
ENSMUSG00000072694	5.32458	2610524H06Rik
ENSMUSG00000024381	5.32413	Bin1
ENSMUSG00000036766	5.31891	Dner
ENSMUSG00000020836	5.31851	Coro6
ENSMUSG00000053930	5.31653	Shisa6
ENSMUSG00000021367	5.31468	Edn1
ENSMUSG00000032363	5.30869	Adamts7
ENSMUSG00000051343	5.30562	Rab11fip5
ENSMUSG00000004347	5.30182	Pde1c
ENSMUSG00000062184	5.30157	Hs6st2
ENSMUSG00000066363	5.2979	Serpina3f
ENSMUSG00000066363	5.2979	Serpina3f
ENSMUSG00000066363	5.2979	Serpina3f
ENSMUSG00000039461	5.29217	Tcta
ENSMUSG00000054588	5.29138	Gbp10
ENSMUSG00000028466	5.28899	Creb3
ENSMUSG00000032366	5.27954	Tpm1
ENSMUSG00000001819	5.27875	Hoxd13
ENSMUSG00000032849	5.2717	Abcc4
ENSMUSG00000036292	5.27101	Gramd1c
ENSMUSG00000048096	5.26516	Lmod1
ENSMUSG00000026833	5.26448	Olfm1
ENSMUSG00000035441	5.2627	Myo1d
ENSMUSG00000030659	5.26048	Nucb2
ENSMUSG00000054675	5.25659	Tmem119
ENSMUSG00000016087	5.25571	Fli1
ENSMUSG00000013076	5.25243	Amotl1
ENSMUSG00000050035	5.25076	Fhl4
ENSMUSG00000046338	5.24529	Gpat2
ENSMUSG00000025658	5.24453	Cnksr2
ENSMUSG00000022865	5.24343	Cxadr
ENSMUSG00000034744	5.23935	Nagk
ENSMUSG00000024897	5.22957	Apba1
ENSMUSG00000058589	5.22315	Anks1b
ENSMUSG00000030088	5.22223	Aldh1l1
ENSMUSG00000052565	5.21874	Hist1h1d
ENSMUSG00000055980	5.21796	Irs1
ENSMUSG00000055435	5.21099	Maf
ENSMUSG00000034005	5.21007	Gal3st2
ENSMUSG00000045942	5.20952	BC049762
ENSMUSG00000064010	5.20952	Dppa1
ENSMUSG00000064057	5.20952	Scgb3a1
ENSMUSG00000069763	5.20952	Tmem100
ENSMUSG00000043592	5.207	Unc5cl
ENSMUSG00000046093	5.20621	Hpcal4
ENSMUSG00000002997	5.20609	Prkar2b
ENSMUSG00000005220	5.2051	Corin
ENSMUSG00000005220	5.2051	Corin
ENSMUSG00000027901	5.2051	Dennd2d
ENSMUSG00000064741	5.2051	Snord14a
ENSMUSG00000069899	5.2051	Gm12166
ENSMUSG00000079243	5.2051	Xirp1
ENSMUSG00000035172	5.20372	Plekhh3
ENSMUSG00000023886	5.2035	Smoc2
ENSMUSG00000026109	5.20289	Tmeff2
ENSMUSG00000041439	5.20289	Mfsd6
ENSMUSG00000075402	5.20289	Krt76
ENSMUSG00000089687	5.20289	Rab42-ps
ENSMUSG00000074028	5.20112	Slc22a13
ENSMUSG00000028794	5.20068	A3galt2
ENSMUSG00000048534	5.20068	Amica1
ENSMUSG00000048794	5.20068	Ccdc37
ENSMUSG00000040254	5.19921	Sema3d
ENSMUSG00000019872	5.19847	Smpdl3a
ENSMUSG00000046550	5.19689	Spin2
ENSMUSG00000025551	5.19626	Fgf14
ENSMUSG00000089889	5.19626	0610040B10Rik
ENSMUSG00000046613	5.19516	Vwa5b2
ENSMUSG00000004872	5.19019	Pax3
ENSMUSG00000026833	5.18932	Olfm1
ENSMUSG00000032849	5.18639	Abcc4
ENSMUSG00000023036	5.18519	Pcdhgc5
ENSMUSG00000005968	5.18091	Tuft1
ENSMUSG00000061859	5.17953	Inadl
ENSMUSG00000038042	5.17872	Ptpdc1
ENSMUSG00000026249	5.17772	Serpine2
ENSMUSG00000031824	5.1661	6430548M08Rik
ENSMUSG00000090240	5.15774	NA
ENSMUSG00000021998	5.15302	Lcp1
ENSMUSG00000026344	5.15235	Lypd1
ENSMUSG00000028207	5.15114	Asph
ENSMUSG00000040659	5.14855	Efhd2
ENSMUSG00000054385	5.1481	Ceacam2
ENSMUSG00000024810	5.14013	Il33
ENSMUSG00000018672	5.13091	Copz2
ENSMUSG00000035109	5.13031	Shc4
ENSMUSG00000032420	5.12851	Nt5e
ENSMUSG00000036422	5.12814	Pcdh8
ENSMUSG00000022969	5.12121	Il10rb
ENSMUSG00000025739	5.10532	Gng13
ENSMUSG00000023000	5.1047	Dhh
ENSMUSG00000054342	5.09584	Kcnn4
ENSMUSG00000025867	5.09196	Cplx2
ENSMUSG00000042684	5.09187	Npl
ENSMUSG00000063535	5.08482	Zfp773
ENSMUSG00000045629	5.08408	Sh3tc2
ENSMUSG00000026347	5.08374	Tmem163
ENSMUSG00000048960	5.08333	Prex2
ENSMUSG00000028207	5.07898	Asph
ENSMUSG00000007041	5.07623	Clic1
ENSMUSG00000020846	5.07099	Fam101b
ENSMUSG00000049550	5.06788	Clip1
ENSMUSG00000029576	5.06772	Radil
ENSMUSG00000033187	5.06303	BC016579
ENSMUSG00000036904	5.06293	Fzd8
ENSMUSG00000049721	5.05914	Gal3st1
ENSMUSG00000027560	5.05522	Dok5
ENSMUSG00000018973	5.05425	Hoxb1
ENSMUSG00000025586	5.05256	Cpeb1
ENSMUSG00000052560	5.03603	Cpne8
ENSMUSG00000035413	5.03551	Tmem98
ENSMUSG00000001348	5.0288	Acp5
ENSMUSG00000039043	5.02697	2610034B18Rik
ENSMUSG00000043300	5.02558	B3galnt1
ENSMUSG00000041650	5.02421	Pcca
ENSMUSG00000001504	5.01684	Irx2
ENSMUSG00000021831	5.01596	Ero1l
ENSMUSG00000020023	5.01575	Tmcc3
ENSMUSG00000060681	5.01477	Slc9a6
ENSMUSG00000027859	5.01314	Ngf
ENSMUSG00000032281	5.01019	Acsbg1
ENSMUSG00000057914	5.01019	Cacnb2
ENSMUSG00000028445	5.00921	Enho
ENSMUSG00000021973	5.00211	Efha1
ENSMUSG00000021506	5.00135	Pitx1
ENSMUSG00000024064	5.00135	Galnt14
ENSMUSG00000032849	4.99975	Abcc4
ENSMUSG00000031176	4.99869	Dynlt3
ENSMUSG00000068876	4.99852	Cgn
ENSMUSG00000001348	4.99425	Acp5
ENSMUSG00000034744	4.99103	Nagk
ENSMUSG00000035498	4.98783	Cdcp1
ENSMUSG00000032667	4.98746	Pon2
ENSMUSG00000053977	4.98476	Cd8a
ENSMUSG00000053977	4.98476	Cd8a
ENSMUSG00000050732	4.97717	Vamp8
ENSMUSG00000001672	4.97563	Marveld3
ENSMUSG00000031891	4.97121	Hsd11b2
ENSMUSG00000046699	4.97033	Slitrk4
ENSMUSG00000045730	4.96837	Adrb2
ENSMUSG00000046733	4.96741	Gprc5a
ENSMUSG00000027322	4.96445	Siglec1
ENSMUSG00000022793	4.96406	B4galt4
ENSMUSG00000001473	4.96006	Tubb6
ENSMUSG00000040533	4.95902	Matn1
ENSMUSG00000020695	4.95448	Mrc2
ENSMUSG00000030966	4.9526	Trim21
ENSMUSG00000026482	4.95237	Rgl1
ENSMUSG00000033016	4.95229	Nfatc1
ENSMUSG00000059498	4.94851	Fcgr3
ENSMUSG00000000416	4.94621	Cttnbp2
ENSMUSG00000038936	4.94517	Sccpdh
ENSMUSG00000039089	4.92873	L3mbtl3
ENSMUSG00000034957	4.92468	Cebpa
ENSMUSG00000020723	4.92379	Cacng4
ENSMUSG00000036103	4.92148	Colec12
ENSMUSG00000026739	4.91821	Bmi1
ENSMUSG00000011632	4.91716	2310033E01Rik
ENSMUSG00000028005	4.91716	Gucy1b3
ENSMUSG00000028005	4.91716	Gucy1b3
ENSMUSG00000024747	4.91495	Aldh1a7
ENSMUSG00000043036	4.91495	Ccdc63
ENSMUSG00000050197	4.91495	Rhox13
ENSMUSG00000036985	4.91387	Zdhhc9
ENSMUSG00000024647	4.91384	Cbln2
ENSMUSG00000038879	4.91384	Nipal2
ENSMUSG00000024235	4.91274	Map3k8
ENSMUSG00000042213	4.91274	Anubl1
ENSMUSG00000046714	4.91274	Foxc2
ENSMUSG00000026335	4.91193	Pam
ENSMUSG00000023905	4.91191	Tnfrsf12a
ENSMUSG00000026051	4.91053	1500015O10Rik
ENSMUSG00000030307	4.90832	Slc6a11
ENSMUSG00000029838	4.9066	Ptn
ENSMUSG00000040478	4.899	Prdm13
ENSMUSG00000010830	4.89658	Kdelr3
ENSMUSG00000063488	4.89075	Zfp167
ENSMUSG00000034353	4.89072	Ramp1
ENSMUSG00000029552	4.88699	Tes
ENSMUSG00000039629	4.88246	Fam40b
ENSMUSG00000034616	4.88173	Ssh3
ENSMUSG00000030022	4.88128	Adamts9
ENSMUSG00000019803	4.87729	Nr2e1
ENSMUSG00000033306	4.87262	Lpp
ENSMUSG00000059327	4.87145	Eda
ENSMUSG00000059327	4.87145	Eda
ENSMUSG00000000605	4.87115	Clcn4-2
ENSMUSG00000078496	4.87041	Gm13152
ENSMUSG00000027177	4.86467	Hipk3
ENSMUSG00000032540	4.86151	Abhd5
ENSMUSG00000024776	4.86139	Stambpl1
ENSMUSG00000022130	4.85601	Tgds
ENSMUSG00000029217	4.85282	Tec
ENSMUSG00000046532	4.85005	Ar
ENSMUSG00000022061	4.84341	Nkx3-1
ENSMUSG00000033016	4.84176	Nfatc1
ENSMUSG00000027177	4.83602	Hipk3
ENSMUSG00000020061	4.83002	Mybpc1
ENSMUSG00000059327	4.82676	Eda
ENSMUSG00000026866	4.81846	Kynu
ENSMUSG00000000078	4.81806	Klf6
ENSMUSG00000027297	4.81676	Ltk
ENSMUSG00000027297	4.81676	Ltk
ENSMUSG00000027297	4.81676	Ltk
ENSMUSG00000027297	4.81676	Ltk
ENSMUSG00000049122	4.81641	Frmd3
ENSMUSG00000033306	4.81461	Lpp
ENSMUSG00000059325	4.8141	Hopx
ENSMUSG00000022865	4.81397	Cxadr
ENSMUSG00000090238	4.81381	NA
ENSMUSG00000058070	4.81072	Eml1
ENSMUSG00000059883	4.81043	Irak4
ENSMUSG00000048482	4.81022	Bdnf
ENSMUSG00000048482	4.81022	Bdnf
ENSMUSG00000042251	4.80885	Pm20d1
ENSMUSG00000030966	4.80752	Trim21
ENSMUSG00000049721	4.79933	Gal3st1
ENSMUSG00000033306	4.79099	Lpp
ENSMUSG00000053475	4.79	Tnfaip6
ENSMUSG00000061544	4.78776	Zfp229
ENSMUSG00000021404	4.78491	Serpinb9c
ENSMUSG00000007908	4.78332	Hmgcll1
ENSMUSG00000027805	4.78311	Pfn2
ENSMUSG00000059327	4.78208	Eda
ENSMUSG00000059327	4.78208	Eda
ENSMUSG00000059327	4.78208	Eda
ENSMUSG00000059327	4.78208	Eda
ENSMUSG00000079022	4.78185	Col22a1
ENSMUSG00000038602	4.77121	Slc35f1
ENSMUSG00000069300	4.77047	Hist1h2bj
ENSMUSG00000032353	4.76932	Tmed3
ENSMUSG00000016758	4.76877	Bik
ENSMUSG00000028480	4.76427	Glipr2
ENSMUSG00000031904	4.76214	Slc7a6
ENSMUSG00000045287	4.7616	Rtn4rl1
ENSMUSG00000029217	4.76119	Tec
ENSMUSG00000042215	4.76093	Bag2
ENSMUSG00000047409	4.75863	Ctdspl
ENSMUSG00000030340	4.75523	Scnn1a
ENSMUSG00000028207	4.75459	Asph
ENSMUSG00000054385	4.75353	Ceacam2
ENSMUSG00000053490	4.75069	Trim60
ENSMUSG00000019851	4.74534	Perp
ENSMUSG00000022261	4.7378	Sdc2
ENSMUSG00000059327	4.7374	Eda
ENSMUSG00000019718	4.73588	2810055F11Rik
ENSMUSG00000002808	4.73071	Epdr1
ENSMUSG00000054580	4.72588	Pla2r1
ENSMUSG00000031824	4.71682	6430548M08Rik
ENSMUSG00000031824	4.71682	6430548M08Rik
ENSMUSG00000040812	4.71635	Agbl2
ENSMUSG00000058906	4.71031	Zfp353
ENSMUSG00000067284	4.70756	NA
ENSMUSG00000040997	4.70573	Abhd4
ENSMUSG00000034930	4.70367	Rtkn
ENSMUSG00000059327	4.70204	Eda
ENSMUSG00000078689	4.69353	Mup6
ENSMUSG00000054385	4.69155	Ceacam2
ENSMUSG00000067925	4.69034	Cxx1a
ENSMUSG00000060429	4.68789	Sntb1
ENSMUSG00000041362	4.684	4930506M07Rik
ENSMUSG00000038147	4.68064	Cd84
ENSMUSG00000048502	4.6794	Duxbl
ENSMUSG00000048502	4.6794	Duxbl
ENSMUSG00000072825	4.67854	AW555464
ENSMUSG00000058070	4.67719	Eml1
ENSMUSG00000042807	4.67467	Hecw2
ENSMUSG00000004709	4.67411	Cd244
ENSMUSG00000026170	4.67334	Cyp27a1
ENSMUSG00000039960	4.65766	Rhou
ENSMUSG00000044629	4.65539	Cnrip1
ENSMUSG00000049680	4.65163	Urgcp
ENSMUSG00000001123	4.64055	Lgals9
ENSMUSG00000041594	4.64024	Tmtc4
ENSMUSG00000071369	4.63415	Map3k5
[truncated: 3,733 more rows]
