# Supplementary material for: TRIM28 repression of retrotransposon-based enhancers is necessary to preserve transcriptional dynamics in embryonic stem cells
Source: HighWire-hosted journal article supplement (doi:10.1101/gr.147678.112), 2012-12-10
Supplement: Supp_Table2.xlsx [file Supp_Table2.xlsx]

## Sheet: KAP1_targets
Gene promoters (TSS +/- 2kb) targeted by TRIM28 (bound not through an ERV)
			Gene
chr17	75402908	75406910	Ltbp1
chr7	6681130	6685132	Peg3
chr6	4695202	4699204	Peg10
chr1	43218804	43222806	Fhl2
chr19	42274740	42278742	Sfrp5
chr11	68937398	68941400	Aloxe3
chr14	68740901	68744903	Nefm
chr14	106503415	106507417	Trim52
chr19	57080716	57084718	Afap1l2
chr11	120220848	120224850	Fscn2
chr1	21286391	21290393	Gm4956
chr4	108077564	108081566	Gpx7
chr4	144903065	144907067	Tnfrsf8
chr4	115745874	115749876	Lrcc41
chr8	13492533	13496535	Gas6
chr8	106623525	106627527	Cdh5
chr9	103102465	103106467	Srprb
chr9	64947293	64951295	Igdcc4
chr14	112072337	112076339	Slitrk5
chr13	25145873	25149875	Dcdc2a
chr19	44565962	44569964	Wnt8b
chr7	149279746	149283748	Dusp8
chr5	135823893	135827895	Fkbp6
chr14	54876907	54880909	Abhd4
chr7	31534490	31538492	Sbsn
chr9	40074801	40078803	Scn3b
chr15	77305477	77309479	Apol10a
chr3	85548186	85552188	Fam160a1
chr4	47068176	47072178	Anks6
chr2	157383814	157387816	Nnat
chr17	36177906	36181908	Gm6034
chr17	35778638	35782640	Dpcr1
chr17	12932177	12936179	Airn
chr12	105623374	105627376	Serpina3m
chr5	144517194	144521196	D130017N08Rik
chr5	144088926	144092928	Zdhhc4
