# Supplementary material for: TRIM28 repression of retrotransposon-based enhancers is necessary to preserve transcriptional dynamics in embryonic stem cells
Source: HighWire-hosted journal article supplement (doi:10.1101/gr.147678.112), 2012-12-10
Supplement: Supp_Table3.xlsx [file Supp_Table3.xlsx]

## Sheet: Nearest_gene_to_K9peaks
Ensembl_ID	Gene_Name	ratio
ENSMUSG00000054272	Zscan4c	3493.76
ENSMUSG00000054272	Zscan4c	3438.86
ENSMUSG00000070828	Zscan4f	3289.87
ENSMUSG00000070828	Zscan4f	3215.14
ENSMUSG00000070828	Zscan4f	3110.37
ENSMUSG00000019768	Esr1	2987.51
ENSMUSG00000018924	Alox15	367.655
ENSMUSG00000058976	Usp17l5	258.125
ENSMUSG00000031963	Bmper	248.565
ENSMUSG00000032327	Stra6	228.052
ENSMUSG00000026450	Chit1	226.035
ENSMUSG00000032327	Stra6	221.089
ENSMUSG00000032327	Stra6	219.937
ENSMUSG00000057321	Dub2a	172.593
ENSMUSG00000056222	Spock1	140.559
ENSMUSG00000056222	Spock1	137.091
ENSMUSG00000056222	Spock1	134.486
ENSMUSG00000024659	Anxa1	120.227
ENSMUSG00000033634	Cml2	113.49
ENSMUSG00000026043	Col3a1	108.678
ENSMUSG00000037025	Foxa2	102.762
ENSMUSG00000020053	Igf1	100.83
ENSMUSG00000007440	Pcdha1	99.153
ENSMUSG00000025902	Sox17	89.6245
ENSMUSG00000032035	Ets1	89.3554
ENSMUSG00000032359	Ctsh	83.8116
ENSMUSG00000032332	Col12a1	83.5143
ENSMUSG00000042429	Adora1	82.4011
ENSMUSG00000038244	Mical2	82.3703
ENSMUSG00000075602	Ly6a	80.0757
ENSMUSG00000022952	Runx1	79.2827
ENSMUSG00000026042	Col5a2	77.1198
ENSMUSG00000042429	Adora1	76.1585
ENSMUSG00000032035	Ets1	75.0177
ENSMUSG00000034159	2310007B03Rik	74.5593
ENSMUSG00000022952	Runx1	74.3637
ENSMUSG00000029231	Pdgfra	70.7147
ENSMUSG00000029231	Pdgfra	70.3439
ENSMUSG00000078942	Naip6	70.0301
ENSMUSG00000007440	Pcdha1	69.4876
ENSMUSG00000007440	Pcdha1	65.3142
ENSMUSG00000030365	Clec2i	65.2716
ENSMUSG00000040253	Gbp7	63.8382
ENSMUSG00000022952	Runx1	63.6742
ENSMUSG00000042961	Egflam	62.1777
ENSMUSG00000054196	Cthrc1	61.5004
ENSMUSG00000074497	A430078G23Rik	61.4972
ENSMUSG00000079450	3110007F17Rik	57.9231
ENSMUSG00000029108	Pcdh7	57.8232
ENSMUSG00000022952	Runx1	56.8852
ENSMUSG00000049420	Tmem200a	56.227
ENSMUSG00000007440	Pcdha1	56.0295
ENSMUSG00000078746	Gm13298	55.8053
ENSMUSG00000029108	Pcdh7	55.4931
ENSMUSG00000021211	Akr1c12	55.2643
ENSMUSG00000031355	Arhgap6	53.7411
ENSMUSG00000031538	Plat	53.3678
ENSMUSG00000033191	Tie1	53.1719
ENSMUSG00000074743	Thbd	52.5901
ENSMUSG00000025017	Pik3ap1	52.5783
ENSMUSG00000049382	Krt8	51.2742
ENSMUSG00000032204	Aqp9	50.8595
ENSMUSG00000075611	Gm11545	48.3259
ENSMUSG00000036856	Wnt4	48.2923
ENSMUSG00000007440	Pcdha1	48.0994
ENSMUSG00000051022	Hs3st1	47.725
ENSMUSG00000022150	Dab2	47.2898
ENSMUSG00000066721	Zfp575	45.3625
ENSMUSG00000031871	Cdh5	45.2773
ENSMUSG00000022150	Dab2	45.2011
ENSMUSG00000007440	Pcdha1	45.0258
ENSMUSG00000026628	Atf3	44.0228
ENSMUSG00000027358	Bmp2	43.9245
ENSMUSG00000022150	Dab2	43.7196
ENSMUSG00000022150	Dab2	43.2981
ENSMUSG00000021278	Amn	42.7519
ENSMUSG00000022146	Osmr	42.498
ENSMUSG00000048612	Myof	42.0308
ENSMUSG00000056380	Gpr50	41.8956
ENSMUSG00000028031	Dkk2	41.3179
ENSMUSG00000063873	Slc24a3	41.1085
ENSMUSG00000035314	Gdpd5	41.1061
ENSMUSG00000021591	Glrx	40.9249
ENSMUSG00000043391	2510009E07Rik	39.4823
ENSMUSG00000070867	Gm12824	39.2078
ENSMUSG00000040413	Timd2	38.8831
ENSMUSG00000073497	AA792892	38.4401
ENSMUSG00000007440	Pcdha1	38.3071
ENSMUSG00000068299	1700019G17Rik	38.2033
ENSMUSG00000028469	Npr2	38.1678
ENSMUSG00000006154	Eps8l1	38.159
ENSMUSG00000040413	Timd2	38.0126
ENSMUSG00000031355	Arhgap6	37.5455
ENSMUSG00000025075	Habp2	36.7254
ENSMUSG00000073209	Klf14	36.4225
ENSMUSG00000024868	Dkk1	36.3321
ENSMUSG00000007440	Pcdha1	35.7496
ENSMUSG00000073874	4933409K07Rik	35.2623
ENSMUSG00000022054	Nefm	34.8274
ENSMUSG00000028023	Pitx2	34.8075
ENSMUSG00000063568	Jazf1	34.7169
ENSMUSG00000057767	Olfr1383	34.2974
ENSMUSG00000017897	Eya2	34.0968
ENSMUSG00000029561	Oasl2	33.5772
ENSMUSG00000035201	B020004J07Rik	33.3529
ENSMUSG00000058571	Gpc6	32.6456
ENSMUSG00000020053	Igf1	32.3803
ENSMUSG00000050069	Grem2	32.378
ENSMUSG00000034918	Cdhr2	32.3699
ENSMUSG00000043943	Naalad2	32.1413
ENSMUSG00000029618	Ocm	32.1297
ENSMUSG00000017607	Tns4	32.1206
ENSMUSG00000020053	Igf1	31.76
ENSMUSG00000067818	Myl9	31.4254
ENSMUSG00000045312	Lhfpl2	30.3927
ENSMUSG00000041923	Nol4	30.3513
ENSMUSG00000063568	Jazf1	30.0833
ENSMUSG00000052396	Mogat2	29.4654
ENSMUSG00000078942	Naip6	29.3012
ENSMUSG00000005836	Gata6	29.1808
ENSMUSG00000040650	Cyp2b23	29.1762
ENSMUSG00000058571	Gpc6	28.9183
ENSMUSG00000020053	Igf1	28.8535
ENSMUSG00000087107	AI662270	28.4708
ENSMUSG00000079012	Serpina3m	28.3888
ENSMUSG00000018217	Pmp22	28.3202
ENSMUSG00000020053	Igf1	28.2331
ENSMUSG00000032231	Anxa2	27.8533
ENSMUSG00000043613	Mmp3	27.7311
ENSMUSG00000075304	Sp5	26.8326
ENSMUSG00000041886	Macc1	26.597
ENSMUSG00000028565	Nfia	26.5485
ENSMUSG00000015968	Cacna1d	26.3281
ENSMUSG00000039116	Gpr126	26.0926
ENSMUSG00000055493	Epm2a	26.0167
ENSMUSG00000040605	Bace2	26.0123
ENSMUSG00000044976	Wdr72	25.999
ENSMUSG00000028813	CK137956	25.9905
ENSMUSG00000060586	H2-Eb1	25.8014
ENSMUSG00000026971	Itgb6	25.649
ENSMUSG00000015968	Cacna1d	25.6453
ENSMUSG00000000125	Wnt3	25.6034
ENSMUSG00000020963	Tshr	24.3868
ENSMUSG00000015579	Nkx2-5	24.3492
ENSMUSG00000028565	Nfia	24.2256
ENSMUSG00000028565	Nfia	24.219
ENSMUSG00000052613	Pcdh15	23.9075
ENSMUSG00000025983	Ccdc150	23.7131
ENSMUSG00000051359	Ncald	23.6176
ENSMUSG00000054728	Phactr1	23.3585
ENSMUSG00000024313	Mep1b	23.3259
ENSMUSG00000021469	Msx2	23.0945
ENSMUSG00000041078	Grid1	22.8912
ENSMUSG00000039385	Cdh6	22.8349
ENSMUSG00000015484	Fam163a	22.526
ENSMUSG00000054423	Cadps	22.5216
ENSMUSG00000052353	9930013L23Rik	22.0748
ENSMUSG00000032487	Ptgs2	21.9209
ENSMUSG00000078664	Sprr2a1	21.8001
ENSMUSG00000021186	Fbln5	21.6953
ENSMUSG00000078206	Gm14458	21.5467
ENSMUSG00000086266	Igf2as	21.541
ENSMUSG00000041986	Elmod1	21.4007
ENSMUSG00000051359	Ncald	21.2963
ENSMUSG00000022367	Has2	20.7195
ENSMUSG00000028023	Pitx2	20.561
ENSMUSG00000049723	Mmp12	20.4736
ENSMUSG00000036972	Zic4	20.2357
ENSMUSG00000028023	Pitx2	20.1908
ENSMUSG00000028280	Gabrr1	20.1191
ENSMUSG00000030770	Parva	20.1122
ENSMUSG00000009687	Fxyd5	20.0481
ENSMUSG00000070870	Cryge	20.0315
ENSMUSG00000032796	Lama1	19.8566
ENSMUSG00000058589	Anks1b	19.8518
ENSMUSG00000058523	Mup5	19.7264
ENSMUSG00000024380	Gypc	19.6598
ENSMUSG00000032006	Pdgfd	19.651
ENSMUSG00000029185	Fam114a1	19.529
ENSMUSG00000025885	Myo5b	19.4834
ENSMUSG00000037949	Ano10	19.4811
ENSMUSG00000009687	Fxyd5	19.2714
ENSMUSG00000066688	Gm13083	19.1521
ENSMUSG00000061825	Ces2c	19.1096
ENSMUSG00000046743	Fat4	19.0751
ENSMUSG00000041842	Fhdc1	19.0314
ENSMUSG00000051726	Kcnf1	18.9926
ENSMUSG00000051359	Ncald	18.9839
ENSMUSG00000025892	Gria4	18.8831
ENSMUSG00000063415	Cyp26b1	18.8757
ENSMUSG00000079018	Ly6c1	18.7935
ENSMUSG00000051397	Tacstd2	18.7211
ENSMUSG00000034324	Tmem132c	18.7179
ENSMUSG00000039865	Slc44a3	18.4967
ENSMUSG00000021187	Tc2n	18.4881
ENSMUSG00000055194	Actbl2	18.2176
ENSMUSG00000054889	Dsp	18.2133
ENSMUSG00000030004	Nat8	18.1775
ENSMUSG00000022986	Krt75	18.1711
ENSMUSG00000022330	Osr2	18.1226
ENSMUSG00000025892	Gria4	18.1094
ENSMUSG00000071815	Fthl17	18.0186
ENSMUSG00000038305	Spats2l	17.8852
ENSMUSG00000072905	Gm5662	17.7901
ENSMUSG00000032679	Cd59a	17.7555
ENSMUSG00000060572	Mfap2	17.5327
ENSMUSG00000074673	Ttll9	17.5088
ENSMUSG00000026586	Prrx1	17.3468
ENSMUSG00000073407	Gm6034	17.3408
ENSMUSG00000032679	Cd59a	17.3227
ENSMUSG00000039578	Fam190a	17.3135
ENSMUSG00000030551	Nr2f2	17.2412
ENSMUSG00000031274	Col4a5	17.2045
ENSMUSG00000032649	Glt25d2	17.0506
ENSMUSG00000073027	Dmrtc1b	17.0187
ENSMUSG00000023232	Serinc2	17.0142
ENSMUSG00000029761	Cald1	16.9755
ENSMUSG00000085795	Zfp703	16.9716
ENSMUSG00000039578	Fam190a	16.9109
ENSMUSG00000021411	1300014I06Rik	16.862
ENSMUSG00000001021	S100a3	16.7848
ENSMUSG00000051279	Gdf6	16.7759
ENSMUSG00000007440	Pcdha1	16.7538
ENSMUSG00000032020	Ubash3b	16.7216
ENSMUSG00000085795	Zfp703	16.6797
ENSMUSG00000021725	Parp8	16.4549
ENSMUSG00000036306	Lzts1	16.3861
ENSMUSG00000007279	Scube2	16.2697
ENSMUSG00000002266	Zim1	16.2089
ENSMUSG00000021943	Gdf10	16.1956
ENSMUSG00000023979	Guca1b	16.1868
ENSMUSG00000017466	Timp2	16.1628
ENSMUSG00000020473	Aebp1	16.13
ENSMUSG00000028033	Kcnq5	15.9752
ENSMUSG00000005107	Slc2a9	15.9033
ENSMUSG00000025185	Loxl4	15.8756
ENSMUSG00000038305	Spats2l	15.8735
ENSMUSG00000051515	Fam181b	15.8028
ENSMUSG00000025185	Loxl4	15.7789
ENSMUSG00000060572	Mfap2	15.6081
ENSMUSG00000029338	Antxr2	15.4647
ENSMUSG00000079018	Ly6c1	15.3557
ENSMUSG00000025789	St8sia2	15.3296
ENSMUSG00000031189	Aff2	15.3163
ENSMUSG00000031274	Col4a5	15.1823
ENSMUSG00000039316	Rftn1	15.131
ENSMUSG00000052516	Robo2	15.0438
ENSMUSG00000020481	Ankrd36	15.0394
ENSMUSG00000027712	Anxa5	15.0335
ENSMUSG00000031216	Stard8	15.0182
ENSMUSG00000022892	App	15.0135
ENSMUSG00000027858	Tspan2	14.7112
ENSMUSG00000048616	Nog	14.7067
ENSMUSG00000021187	Tc2n	14.5892
ENSMUSG00000074813	Gm14005	14.5342
ENSMUSG00000050064	Zfp697	14.5232
ENSMUSG00000028634	Hivep3	14.468
ENSMUSG00000024500	Ppp2r2b	14.4525
ENSMUSG00000026343	Gpr39	14.3731
ENSMUSG00000074673	Ttll9	14.3413
ENSMUSG00000075496	Gm10845	14.0663
ENSMUSG00000024987	Cyp26a1	14
ENSMUSG00000022762	Ncam2	13.9959
ENSMUSG00000061143	Maml3	13.9556
ENSMUSG00000019929	Dcn	13.8744
ENSMUSG00000041688	Amot	13.8397
ENSMUSG00000031952	Chst5	13.8208
ENSMUSG00000021592	Arsk	13.7858
ENSMUSG00000026227	2810459M11Rik	13.7299
ENSMUSG00000000197	Nalcn	13.6809
ENSMUSG00000005107	Slc2a9	13.5953
ENSMUSG00000030551	Nr2f2	13.5798
ENSMUSG00000026227	2810459M11Rik	13.5785
ENSMUSG00000074359	Psg23	13.5252
ENSMUSG00000053141	Ptprt	13.4036
ENSMUSG00000058624	Gda	13.3626
ENSMUSG00000039546	Ajap1	13.3051
ENSMUSG00000035984	Nme5	13.3029
ENSMUSG00000037370	Enpp1	13.3018
ENSMUSG00000033721	Vav3	13.3007
ENSMUSG00000032680	6820408C15Rik	13.2941
ENSMUSG00000051373	Ppapdc3	13.2897
ENSMUSG00000047712	Ust	13.1646
ENSMUSG00000046805	Mpeg1	13.1043
ENSMUSG00000034416	Pkd1l2	13.1036
ENSMUSG00000021959	Lats2	13.005
ENSMUSG00000020475	Pgam2	13.0007
ENSMUSG00000021403	Serpinb9b	12.992
ENSMUSG00000032440	Tgfbr2	12.9829
ENSMUSG00000050092	Sprr2b	12.9533
ENSMUSG00000051081	Gm4847	12.9321
ENSMUSG00000029669	Tspan12	12.919
ENSMUSG00000074766	Ism1	12.8666
ENSMUSG00000033209	Ttc28	12.8155
ENSMUSG00000042228	Lyn	12.8027
ENSMUSG00000027508	Pag1	12.7693
ENSMUSG00000074813	Gm14005	12.7197
ENSMUSG00000073067	9130019P16Rik	12.7152
ENSMUSG00000023945	Slc5a7	12.7049
ENSMUSG00000022894	Adamts5	12.6474
ENSMUSG00000039384	Dusp10	12.6247
ENSMUSG00000033214	Slitrk5	12.5858
ENSMUSG00000036412	Arsi	12.58
ENSMUSG00000032440	Tgfbr2	12.5716
ENSMUSG00000049830	Gm9839	12.5069
ENSMUSG00000005107	Slc2a9	12.4391
ENSMUSG00000046159	Chrm3	12.4192
ENSMUSG00000033684	Qsox1	12.4063
ENSMUSG00000042228	Lyn	12.3651
ENSMUSG00000033684	Qsox1	12.302
ENSMUSG00000031799	Tpm4	12.262
ENSMUSG00000024074	Crim1	12.246
ENSMUSG00000087775	RNaseP_nuc	12.2431
ENSMUSG00000020633	Dcdc2c	12.225
ENSMUSG00000020774	Aspa	12.1511
ENSMUSG00000022583	Ly6f	12.1467
ENSMUSG00000019848	Popdc3	12.1438
ENSMUSG00000055737	Ghr	12.1416
ENSMUSG00000034127	Tspan8	12.1379
ENSMUSG00000037437	Adam32	12.1335
ENSMUSG00000058152	Chsy3	12.1335
ENSMUSG00000054728	Phactr1	11.9199
ENSMUSG00000040013	Fkbp6	11.8744
ENSMUSG00000051111	Sv2c	11.8377
ENSMUSG00000051043	Gprc5c	11.8159
ENSMUSG00000052914	Cyp2j6	11.7591
ENSMUSG00000043885	Slc36a4	11.7547
ENSMUSG00000060508	Nlrp9b	11.6765
ENSMUSG00000031870	Pgr	11.5767
ENSMUSG00000024500	Ppp2r2b	11.5509
ENSMUSG00000027966	Col11a1	11.5434
ENSMUSG00000035517	Tdrd7	11.3824
ENSMUSG00000041741	Pde3a	11.3365
ENSMUSG00000005107	Slc2a9	11.2829
ENSMUSG00000025219	Fgf8	11.2812
ENSMUSG00000033721	Vav3	11.2729
ENSMUSG00000034127	Tspan8	11.2696
ENSMUSG00000046500	Fam19a4	11.2652
ENSMUSG00000021209	Ppp4r4	11.2004
ENSMUSG00000053846	Lipg	11.1344
ENSMUSG00000032374	Plod2	11.1279
ENSMUSG00000054555	Adam12	11.1256
ENSMUSG00000021213	Akr1c13	11.1151
ENSMUSG00000090165	Ugt1a10	11.1067
ENSMUSG00000002384	Bmp8b	11.0867
ENSMUSG00000072949	Acot1	11.0792
ENSMUSG00000052656	Rnf103	11.071
ENSMUSG00000024172	St6gal2	10.9817
ENSMUSG00000037892	Pcdh18	10.9786
ENSMUSG00000062980	A430107O13Rik	10.9773
ENSMUSG00000051236	Msrb3	10.9512
ENSMUSG00000060962	Dmkn	10.9179
ENSMUSG00000015053	Gata2	10.9105
ENSMUSG00000032374	Plod2	10.8066
ENSMUSG00000059588	Calcrl	10.8002
ENSMUSG00000027848	Olfml3	10.7897
ENSMUSG00000020160	Meis1	10.7283
ENSMUSG00000031627	Irf2	10.6967
ENSMUSG00000019230	Lhx9	10.6893
ENSMUSG00000018819	Lsp1	10.6805
ENSMUSG00000025892	Gria4	10.6514
ENSMUSG00000023159	Psg29	10.6421
ENSMUSG00000055737	Ghr	10.6373
ENSMUSG00000027082	Tfpi	10.6199
ENSMUSG00000022122	Ednrb	10.5864
ENSMUSG00000007888	Crlf1	10.5777
ENSMUSG00000027200	Sema6d	10.5526
ENSMUSG00000051043	Gprc5c	10.5516
ENSMUSG00000060962	Dmkn	10.5215
ENSMUSG00000027082	Tfpi	10.4919
ENSMUSG00000025469	Msx3	10.4058
ENSMUSG00000031712	Il15	10.4058
ENSMUSG00000060962	Dmkn	10.4053
ENSMUSG00000038296	Galntl4	10.4036
ENSMUSG00000050640	Tmem150c	10.4036
ENSMUSG00000041377	Ninj2	10.3969
ENSMUSG00000052688	5430435G22Rik	10.3881
ENSMUSG00000054728	Phactr1	10.3881
ENSMUSG00000021959	Lats2	10.3766
ENSMUSG00000046314	Stxbp6	10.374
ENSMUSG00000041624	Gucy1a2	10.3443
ENSMUSG00000041923	Nol4	10.3361
ENSMUSG00000019775	Rgs17	10.2273
ENSMUSG00000016283	H2-M2	10.222
ENSMUSG00000025219	Fgf8	10.2099
ENSMUSG00000022383	Ppara	10.1931
ENSMUSG00000074505	Fat3	10.1579
ENSMUSG00000027200	Sema6d	10.083
ENSMUSG00000050138	Kcnk12	10.069
ENSMUSG00000021250	Fos	10.0499
ENSMUSG00000021456	Fbp2	10.0337
ENSMUSG00000026185	Igfbp5	10.0308
ENSMUSG00000039198	Ptchd3	10.0204
ENSMUSG00000051043	Gprc5c	10.0027
ENSMUSG00000040690	Col16a1	9.94507
ENSMUSG00000019916	P4ha1	9.92819
ENSMUSG00000039239	Tgfb2	9.92631
ENSMUSG00000037813	D630003M21Rik	9.83211
ENSMUSG00000049404	Rarres1	9.82769
ENSMUSG00000033965	Slc16a2	9.80013
ENSMUSG00000004633	Chn2	9.76435
ENSMUSG00000029695	Aass	9.72802
ENSMUSG00000025219	Fgf8	9.67421
ENSMUSG00000038402	Foxf2	9.65104
ENSMUSG00000028370	Pappa	9.54086
ENSMUSG00000061353	Cxcl12	9.44352
ENSMUSG00000034687	Fras1	9.35757
ENSMUSG00000051627	Hist1h1e	9.34041
ENSMUSG00000037788	Vopp1	9.33336
ENSMUSG00000030790	Adm	9.27438
ENSMUSG00000028028	Alpk1	9.25401
ENSMUSG00000021852	Slc35f4	9.24959
ENSMUSG00000059434	Gckr	9.24959
ENSMUSG00000020890	Gucy2e	9.2319
ENSMUSG00000027221	Chst1	9.15428
ENSMUSG00000061633	1700029P11Rik	9.15422
ENSMUSG00000042331	Specc1	9.10985
ENSMUSG00000039903	4931408A02Rik	9.10506
ENSMUSG00000022321	Cdh10	9.05468
ENSMUSG00000028525	Pde4b	9.0352
ENSMUSG00000023328	Ache	9.02188
ENSMUSG00000021732	Fgf10	9.0179
ENSMUSG00000004633	Chn2	9.01155
ENSMUSG00000025608	Podxl	9.00909
ENSMUSG00000039782	Cpeb2	9.00383
ENSMUSG00000023868	Pde10a	8.99265
ENSMUSG00000054364	Rhob	8.96622
ENSMUSG00000058589	Anks1b	8.95722
ENSMUSG00000075703	Ept1	8.93492
ENSMUSG00000025938	Slco5a1	8.91122
ENSMUSG00000045092	S1pr1	8.89625
ENSMUSG00000048022	Tmem229a	8.89621
ENSMUSG00000089738	6330403K07Rik	8.88316
ENSMUSG00000068299	1700019G17Rik	8.82182
ENSMUSG00000040265	Dnm3	8.81657
ENSMUSG00000045378	Pxt1	8.81436
ENSMUSG00000055737	Ghr	8.80008
ENSMUSG00000044903	Psg22	8.79739
ENSMUSG00000025945	Crygf	8.77512
ENSMUSG00000028545	Bend5	8.76686
ENSMUSG00000072620	Slfn2	8.76297
ENSMUSG00000020226	Slc5a4b	8.72022
ENSMUSG00000038291	Snx25	8.71764
ENSMUSG00000028545	Bend5	8.69929
ENSMUSG00000046186	Cd109	8.69048
ENSMUSG00000045932	Ifit2	8.68254
ENSMUSG00000025777	Gdap1	8.67812
ENSMUSG00000074127	Cmtm2a	8.67812
ENSMUSG00000028551	Cdkn2c	8.6737
ENSMUSG00000034839	Larp6	8.66928
ENSMUSG00000062760	1810041L15Rik	8.61601
ENSMUSG00000039209	Rpl39l	8.5678
ENSMUSG00000030562	Nox4	8.55145
ENSMUSG00000049128	Ivl	8.54171
ENSMUSG00000061353	Cxcl12	8.49592
ENSMUSG00000030492	Slc7a9	8.48321
ENSMUSG00000021760	Gpx8	8.4821
ENSMUSG00000042510	AA986860	8.4351
ENSMUSG00000063305	Psg20	8.43457
ENSMUSG00000019944	Rhobtb1	8.42906
ENSMUSG00000044456	Rin3	8.41413
ENSMUSG00000025810	Nrp1	8.38567
ENSMUSG00000018819	Lsp1	8.36365
ENSMUSG00000004347	Pde1c	8.36144
ENSMUSG00000029484	Anxa3	8.3046
ENSMUSG00000026342	Slc35f5	8.28857
ENSMUSG00000004508	Gab2	8.28584
ENSMUSG00000041608	Entpd3	8.28388
ENSMUSG00000024339	Tap2	8.22912
ENSMUSG00000019832	Rab32	8.21741
ENSMUSG00000034258	Mfsd7c	8.20319
ENSMUSG00000032419	Tbx18	8.19586
ENSMUSG00000027955	Fam198b	8.14488
ENSMUSG00000026077	Npas2	8.14247
ENSMUSG00000052392	Acot4	8.10735
ENSMUSG00000074604	Mgst2	8.10223
ENSMUSG00000033174	Mgll	8.0956
ENSMUSG00000003746	Man1a	8.09427
ENSMUSG00000021373	Cap2	8.04765
ENSMUSG00000062991	Nrg1	8.03523
ENSMUSG00000068748	Ptprz1	7.98258
ENSMUSG00000026365	Cfh	7.97946
ENSMUSG00000044456	Rin3	7.96927
ENSMUSG00000020098	Pcbd1	7.94886
ENSMUSG00000027356	Fermt1	7.94841
ENSMUSG00000027082	Tfpi	7.92473
ENSMUSG00000035910	Dcdc2a	7.88306
ENSMUSG00000078625	Gm12789	7.81816
ENSMUSG00000044103	Il1f9	7.8104
ENSMUSG00000022306	Zfpm2	7.80655
ENSMUSG00000027868	Tbx15	7.80035
ENSMUSG00000060962	Dmkn	7.79842
ENSMUSG00000046818	Ddit4l	7.79684
ENSMUSG00000051375	Pcdh1	7.78257
ENSMUSG00000022912	Pros1	7.7409
ENSMUSG00000012350	Ehf	7.73551
ENSMUSG00000026837	Col5a1	7.71485
ENSMUSG00000031751	Amfr	7.67939
ENSMUSG00000023186	Vwa5a	7.66256
ENSMUSG00000023186	Vwa5a	7.66013
ENSMUSG00000030413	Pglyrp1	7.62261
ENSMUSG00000071217	BB287469	7.61519
ENSMUSG00000019775	Rgs17	7.60189
ENSMUSG00000041552	Ptchd1	7.59015
ENSMUSG00000026432	Avpr1b	7.58794
ENSMUSG00000061859	Inadl	7.57543
ENSMUSG00000023873	1700010I14Rik	7.52634
ENSMUSG00000031343	Gabra3	7.52348
ENSMUSG00000054162	Spock3	7.5175
ENSMUSG00000033016	Nfatc1	7.51485
ENSMUSG00000020218	Wif1	7.50424
ENSMUSG00000036158	Prickle1	7.5023
ENSMUSG00000031647	Mfap3l	7.48331
ENSMUSG00000033542	Arhgef5	7.45444
ENSMUSG00000022707	Gbe1	7.4238
ENSMUSG00000001986	Gria3	7.40875
ENSMUSG00000035200	Chrnb4	7.39534
ENSMUSG00000059246	Foxb1	7.3787
ENSMUSG00000020299	4930524B15Rik	7.37353
ENSMUSG00000022790	Igsf11	7.37243
ENSMUSG00000020728	Ccdc46	7.36966
ENSMUSG00000058656	Samd12	7.32259
ENSMUSG00000048915	Efna5	7.316
ENSMUSG00000033016	Nfatc1	7.30852
ENSMUSG00000057143	Trim12c	7.23751
ENSMUSG00000058420	Syt17	7.22956
ENSMUSG00000033182	Kbtbd12	7.21629
ENSMUSG00000053819	Camk2d	7.20726
ENSMUSG00000051323	Pcdh19	7.15675
ENSMUSG00000027447	Cst3	7.14472
ENSMUSG00000048915	Efna5	7.13101
ENSMUSG00000022636	Alcam	7.10585
ENSMUSG00000025396	Hsd17b6	7.10143
ENSMUSG00000029019	Nppb	7.0992
ENSMUSG00000020062	Slc5a8	7.08116
ENSMUSG00000030208	Emp1	7.05325
ENSMUSG00000046982	Tshz1	7.04875
ENSMUSG00000022454	Nell2	7.04517
ENSMUSG00000026728	Vim	7.04026
ENSMUSG00000026748	Plxdc2	7.02727
ENSMUSG00000043068	Fam89a	7.02496
ENSMUSG00000038910	Plcl2	7.01876
ENSMUSG00000029470	P2rx4	7.00703
ENSMUSG00000027562	Car2	6.98749
ENSMUSG00000061859	Inadl	6.98604
ENSMUSG00000042453	Reln	6.98251
ENSMUSG00000033960	9430020K01Rik	6.98192
ENSMUSG00000031647	Mfap3l	6.9545
ENSMUSG00000051323	Pcdh19	6.95141
ENSMUSG00000037868	Egr2	6.9388
ENSMUSG00000005649	Cabp5	6.93719
ENSMUSG00000051920	Rspo2	6.93719
ENSMUSG00000054150	4831426I19Rik	6.93719
ENSMUSG00000025002	Cyp2c55	6.93277
ENSMUSG00000027380	Acoxl	6.92835
ENSMUSG00000034813	Grip1	6.92823
ENSMUSG00000030223	Ptpro	6.91951
ENSMUSG00000031111	Igsf1	6.89031
ENSMUSG00000031358	Msl3	6.86864
ENSMUSG00000031886	Ces2e	6.84491
ENSMUSG00000031639	Tlr3	6.84195
ENSMUSG00000038156	Spon1	6.839
ENSMUSG00000039552	Rsph4a	6.82574
ENSMUSG00000032537	Ephb1	6.82467
ENSMUSG00000033016	Nfatc1	6.76729
ENSMUSG00000021228	Acot3	6.74641
ENSMUSG00000049625	Tifab	6.74081
ENSMUSG00000032948	Lipi	6.73952
ENSMUSG00000061859	Inadl	6.7376
ENSMUSG00000070421	Olfr658	6.73344
ENSMUSG00000061353	Cxcl12	6.73312
ENSMUSG00000063564	Col23a1	6.71424
ENSMUSG00000065308	U1	6.70949
ENSMUSG00000028173	Wls	6.69495
ENSMUSG00000053897	Slc39a8	6.69312
ENSMUSG00000057123	Gja5	6.68778
ENSMUSG00000024063	Lbh	6.68601
ENSMUSG00000057143	Trim12c	6.67289
ENSMUSG00000026114	Cnga3	6.66735
ENSMUSG00000030909	Anks4b	6.6598
ENSMUSG00000053819	Camk2d	6.64763
ENSMUSG00000014602	Kif1a	6.63754
ENSMUSG00000014602	Kif1a	6.62622
ENSMUSG00000041607	Mbp	6.59954
ENSMUSG00000071379	Hpcal1	6.58889
ENSMUSG00000036256	Igfbp7	6.58876
ENSMUSG00000070837	Aurkc	6.58685
ENSMUSG00000033016	Nfatc1	6.58523
ENSMUSG00000074783	AU019990	6.57119
ENSMUSG00000047414	Flrt2	6.56894
ENSMUSG00000053897	Slc39a8	6.56063
ENSMUSG00000019230	Lhx9	6.54117
ENSMUSG00000019866	Aim1	6.52623
ENSMUSG00000021087	Rtn1	6.52606
ENSMUSG00000026509	Capn2	6.50441
ENSMUSG00000034690	Nlrp4c	6.50246
ENSMUSG00000032418	Me1	6.49462
ENSMUSG00000032537	Ephb1	6.47913
ENSMUSG00000053897	Slc39a8	6.47422
ENSMUSG00000034981	Parm1	6.44273
ENSMUSG00000061013	Mkx	6.40267
ENSMUSG00000031557	Plekha2	6.39478
ENSMUSG00000024154	Gtf2a1l	6.37898
ENSMUSG00000036913	Trim67	6.36667
ENSMUSG00000079494	Cml5	6.3613
ENSMUSG00000054150	4831426I19Rik	6.35969
ENSMUSG00000055197	Fev	6.35688
ENSMUSG00000074768	Bhmt	6.35688
ENSMUSG00000005803	Sqrdl	6.35246
ENSMUSG00000036510	Cdh8	6.35246
ENSMUSG00000022340	Sybu	6.34804
ENSMUSG00000079057	Cyp4v3	6.34362
ENSMUSG00000022240	Ctnnd2	6.34236
ENSMUSG00000073476	Gm10516	6.33042
ENSMUSG00000072923	Gm10439	6.31432
ENSMUSG00000026621	Mosc1	6.31147
ENSMUSG00000037379	Spon2	6.27872
ENSMUSG00000034813	Grip1	6.24878
ENSMUSG00000058976	Usp17l5	6.24467
ENSMUSG00000032625	Thsd7a	6.23892
ENSMUSG00000020205	Phlda1	6.23606
ENSMUSG00000027560	Dok5	6.23551
ENSMUSG00000003992	Ssbp2	6.23033
ENSMUSG00000053819	Camk2d	6.22339
ENSMUSG00000023964	Calcr	6.21586
ENSMUSG00000021843	Ktn1	6.21314
ENSMUSG00000040265	Dnm3	6.2118
ENSMUSG00000070889	Pgap1	6.20761
ENSMUSG00000043388	Tmem130	6.19519
ENSMUSG00000001773	Folh1	6.17818
ENSMUSG00000079362	Gbp6	6.17653
ENSMUSG00000020009	Ifngr1	6.17186
ENSMUSG00000021065	Fut8	6.16875
ENSMUSG00000041607	Mbp	6.14591
ENSMUSG00000022483	Col2a1	6.13288
ENSMUSG00000004085	B230120H23Rik	6.13266
ENSMUSG00000054934	Kcnmb4	6.11739
ENSMUSG00000000142	Axin2	6.1065
ENSMUSG00000046794	Ppp1r3b	6.091
ENSMUSG00000004347	Pde1c	6.06967
ENSMUSG00000056812	St8sia3	6.06497
ENSMUSG00000042834	D0H4S114	6.06047
ENSMUSG00000026630	Batf3	6.0394
ENSMUSG00000042834	D0H4S114	6.03689
ENSMUSG00000028799	Zfp362	6.03482
ENSMUSG00000042834	D0H4S114	6.01388
ENSMUSG00000019230	Lhx9	6.01363
ENSMUSG00000046169	Adamts6	6.01223
ENSMUSG00000021703	Serinc5	6.00121
ENSMUSG00000021226	Acot2	5.98807
ENSMUSG00000027983	Cyp2u1	5.97443
ENSMUSG00000039007	Pgcp	5.97148
ENSMUSG00000073062	Zxdb	5.96964
ENSMUSG00000048482	Bdnf	5.96863
ENSMUSG00000073591	Pcdhb22	5.96505
ENSMUSG00000042500	Eif2c4	5.96299
ENSMUSG00000042834	D0H4S114	5.95215
ENSMUSG00000067916	Gm13139	5.94362
ENSMUSG00000036330	Slc18a1	5.94168
ENSMUSG00000026223	Itm2c	5.94093
ENSMUSG00000075728	U1	5.93104
ENSMUSG00000070605	Gm13251	5.91323
ENSMUSG00000058806	Col13a1	5.90223
ENSMUSG00000021583	Erap1	5.88345
ENSMUSG00000051910	Sox6	5.86583
ENSMUSG00000054640	Slc8a1	5.85457
ENSMUSG00000060512	0610040J01Rik	5.84168
ENSMUSG00000004872	Pax3	5.83618
ENSMUSG00000026413	Pkp1	5.831
ENSMUSG00000003992	Ssbp2	5.82512
ENSMUSG00000032503	Arpp21	5.81765
ENSMUSG00000073125	Xlr3b	5.80945
ENSMUSG00000028327	1300002K09Rik	5.78762
ENSMUSG00000056854	Pou3f4	5.78541
ENSMUSG00000010175	Prox1	5.78394
ENSMUSG00000031662	Snx20	5.78099
ENSMUSG00000048138	Dmrt2	5.78099
ENSMUSG00000022875	Kng1	5.77878
ENSMUSG00000026601	9430070O13Rik	5.77657
ENSMUSG00000027833	Shox2	5.77657
ENSMUSG00000056258	Kcnq3	5.77657
ENSMUSG00000051154	Commd3	5.77202
ENSMUSG00000049922	Slc35c1	5.76988
ENSMUSG00000029298	Gbp9	5.76948
ENSMUSG00000034813	Grip1	5.76121
ENSMUSG00000022483	Col2a1	5.75557
ENSMUSG00000024247	Pkdcc	5.73168
ENSMUSG00000021662	Rgnef	5.72007
ENSMUSG00000050965	Prkca	5.70902
ENSMUSG00000035357	Pdzrn3	5.69867
ENSMUSG00000034112	Atp2c2	5.67985
ENSMUSG00000028351	Dbc1	5.67725
ENSMUSG00000023964	Calcr	5.65759
ENSMUSG00000027684	Mecom	5.64365
ENSMUSG00000030077	Chl1	5.64034
ENSMUSG00000057329	Bcl2	5.63084
ENSMUSG00000049922	Slc35c1	5.60442
ENSMUSG00000039989	Cbx4	5.59608
ENSMUSG00000026401	Daf2	5.59547
ENSMUSG00000039031	Arhgap18	5.5884
ENSMUSG00000028457	Atp8b5	5.58756
ENSMUSG00000039007	Pgcp	5.58461
ENSMUSG00000052684	Jun	5.58433
ENSMUSG00000002881	Nab1	5.578
ENSMUSG00000087023	1110020A21Rik	5.57577
ENSMUSG00000035187	Nkx6-1	5.57067
ENSMUSG00000020023	Tmcc3	5.55781
ENSMUSG00000019790	Stxbp5	5.54442
ENSMUSG00000022577	Ly6h	5.53734
ENSMUSG00000029314	Agpat9	5.517
ENSMUSG00000078962	4932414J04Rik	5.51497
ENSMUSG00000073802	Cdkn2b	5.51424
ENSMUSG00000027861	Casq2	5.50215
ENSMUSG00000037999	Arap2	5.48999
ENSMUSG00000021986	Fam123a	5.47535
ENSMUSG00000055069	Rab39	5.45939
ENSMUSG00000058669	Nkx2-9	5.45821
ENSMUSG00000024598	Fbn2	5.45521
ENSMUSG00000013846	St3gal1	5.44122
ENSMUSG00000051910	Sox6	5.4306
ENSMUSG00000028007	Snx7	5.42051
ENSMUSG00000053765	Oas1f	5.4118
ENSMUSG00000042607	Asb4	5.40857
ENSMUSG00000067916	Gm13139	5.39919
ENSMUSG00000010461	Eya4	5.39707
ENSMUSG00000024810	Il33	5.39608
ENSMUSG00000048376	F2r	5.39451
ENSMUSG00000041620	Mmp1b	5.3838
ENSMUSG00000038349	Plcl1	5.38034
ENSMUSG00000031179	3830417A13Rik	5.3792
ENSMUSG00000028007	Snx7	5.37141
ENSMUSG00000026872	Zeb2	5.36331
ENSMUSG00000041737	Tmem45b	5.35583
ENSMUSG00000028926	Cdk14	5.3549
ENSMUSG00000019647	Sema6a	5.34739
ENSMUSG00000030847	Bag3	5.34733
ENSMUSG00000051910	Sox6	5.34355
ENSMUSG00000004085	B230120H23Rik	5.3299
ENSMUSG00000072694	1500011B03Rik	5.32458
ENSMUSG00000036766	Dner	5.31891
ENSMUSG00000053930	Shisa6	5.31653
ENSMUSG00000004347	Pde1c	5.30182
ENSMUSG00000054588	Gbp10	5.29138
ENSMUSG00000048096	Lmod1	5.26516
ENSMUSG00000035441	Myo1d	5.2627
ENSMUSG00000030659	Nucb2	5.26048
ENSMUSG00000050035	Fhl4	5.25076
ENSMUSG00000025658	Cnksr2	5.24453
ENSMUSG00000022865	Cxadr	5.24343
ENSMUSG00000024897	Apba1	5.22957
ENSMUSG00000058589	Anks1b	5.22315
ENSMUSG00000055980	Irs1	5.21796
ENSMUSG00000055435	Maf	5.21099
ENSMUSG00000034005	Gal3st2	5.21007
ENSMUSG00000045942	BC049762	5.20952
ENSMUSG00000043592	Unc5cl	5.207
ENSMUSG00000002997	Prkar2b	5.20609
ENSMUSG00000027901	Dennd2d	5.2051
ENSMUSG00000023886	Smoc2	5.2035
ENSMUSG00000026109	Tmeff2	5.20289
ENSMUSG00000028794	A3galt2	5.20068
ENSMUSG00000040254	Sema3d	5.19921
ENSMUSG00000019872	Smpdl3a	5.19847
ENSMUSG00000046550	Spin2	5.19689
ENSMUSG00000025551	Fgf14	5.19626
ENSMUSG00000046613	Vwa5b2	5.19516
ENSMUSG00000004872	Pax3	5.19019
ENSMUSG00000061859	Inadl	5.17953
ENSMUSG00000038042	Ptpdc1	5.17872
ENSMUSG00000026249	Serpine2	5.17772
ENSMUSG00000040659	Efhd2	5.14855
ENSMUSG00000054385	Ceacam2	5.1481
ENSMUSG00000024810	Il33	5.14013
ENSMUSG00000035109	Shc4	5.13031
ENSMUSG00000032420	Nt5e	5.12851
ENSMUSG00000036422	Pcdh8	5.12814
ENSMUSG00000063535	Zfp773	5.08482
ENSMUSG00000026347	Tmem163	5.08374
ENSMUSG00000048960	Prex2	5.08333
ENSMUSG00000036904	Fzd8	5.06293
ENSMUSG00000027560	Dok5	5.05522
ENSMUSG00000052560	Cpne8	5.03603
ENSMUSG00000035413	Tmem98	5.03551
ENSMUSG00000001348	Acp5	5.0288
ENSMUSG00000043300	B3galnt1	5.02558
ENSMUSG00000041650	Pcca	5.02421
ENSMUSG00000001504	Irx2	5.01684
ENSMUSG00000020023	Tmcc3	5.01575
ENSMUSG00000027859	Ngf	5.01314
ENSMUSG00000021506	Pitx1	5.00135
ENSMUSG00000031176	Dynlt3	4.99869
ENSMUSG00000068876	Cgn	4.99852
ENSMUSG00000001348	Acp5	4.99425
ENSMUSG00000035498	Cdcp1	4.98783
ENSMUSG00000032667	Pon2	4.98746
ENSMUSG00000053977	Cd8a	4.98476
ENSMUSG00000046699	Slitrk4	4.97033
ENSMUSG00000022793	B4galt4	4.96406
ENSMUSG00000040533	Matn1	4.95902
ENSMUSG00000026482	Rgl1	4.95237
ENSMUSG00000033016	Nfatc1	4.95229
ENSMUSG00000059498	Fcgr3	4.94851
ENSMUSG00000038936	Sccpdh	4.94517
ENSMUSG00000039089	L3mbtl3	4.92873
ENSMUSG00000034957	Cebpa	4.92468
ENSMUSG00000020723	Cacng4	4.92379
ENSMUSG00000036103	Colec12	4.92148
ENSMUSG00000024647	Cbln2	4.91384
ENSMUSG00000038879	Nipal2	4.91384
ENSMUSG00000024235	Map3k8	4.91274
ENSMUSG00000026335	Pam	4.91193
ENSMUSG00000029838	Ptn	4.9066
ENSMUSG00000040478	Prdm13	4.899
ENSMUSG00000063488	Zfp167	4.89075
ENSMUSG00000029552	Tes	4.88699
ENSMUSG00000033306	Lpp	4.87262
ENSMUSG00000059327	Eda	4.87145
ENSMUSG00000000605	Clcn4-2	4.87115
ENSMUSG00000078496	Gm13152	4.87041
ENSMUSG00000032540	Abhd5	4.86151
ENSMUSG00000022130	Tgds	4.85601
ENSMUSG00000029217	Tec	4.85282
ENSMUSG00000046532	Ar	4.85005
ENSMUSG00000033016	Nfatc1	4.84176
ENSMUSG00000059327	Eda	4.82676
ENSMUSG00000026866	Kynu	4.81846
ENSMUSG00000000078	Klf6	4.81806
ENSMUSG00000033306	Lpp	4.81461
ENSMUSG00000059325	Hopx	4.8141
ENSMUSG00000022865	Cxadr	4.81397
ENSMUSG00000058070	Eml1	4.81072
ENSMUSG00000059883	Irak4	4.81043
ENSMUSG00000048482	Bdnf	4.81022
ENSMUSG00000033306	Lpp	4.79099
ENSMUSG00000059327	Eda	4.78208
ENSMUSG00000038602	Slc35f1	4.77121
ENSMUSG00000029217	Tec	4.76119
ENSMUSG00000054385	Ceacam2	4.75353
ENSMUSG00000019851	Perp	4.74534
ENSMUSG00000022261	Sdc2	4.7378
ENSMUSG00000059327	Eda	4.7374
ENSMUSG00000002808	Epdr1	4.73071
ENSMUSG00000058906	Zfp353	4.71031
ENSMUSG00000059327	Eda	4.70204
ENSMUSG00000078689	Mup6	4.69353
ENSMUSG00000054385	Ceacam2	4.69155
ENSMUSG00000060429	Sntb1	4.68789
ENSMUSG00000041362	4930506M07Rik	4.684
ENSMUSG00000038147	Cd84	4.68064
ENSMUSG00000048502	Duxbl	4.6794
ENSMUSG00000072825	AW555464	4.67854
ENSMUSG00000058070	Eml1	4.67719
ENSMUSG00000004709	Cd244	4.67411
ENSMUSG00000049680	Urgcp	4.65163
ENSMUSG00000071369	Map3k5	4.63415
ENSMUSG00000043556	Fbxl7	4.63264
ENSMUSG00000029219	Slc10a4	4.62921
ENSMUSG00000049680	Urgcp	4.6249
ENSMUSG00000027901	Dennd2d	4.62479
ENSMUSG00000028360	Slc44a5	4.62479
ENSMUSG00000029082	Bst1	4.62479
ENSMUSG00000029217	Tec	4.62479
ENSMUSG00000041540	Sox5	4.62479
ENSMUSG00000053063	Clec12a	4.62258
ENSMUSG00000039377	Hlx	4.62148
ENSMUSG00000056055	Sag	4.62037
ENSMUSG00000005803	Sqrdl	4.61816
ENSMUSG00000075700	2810407C02Rik	4.616
ENSMUSG00000031549	Ido2	4.61335
ENSMUSG00000020427	Igfbp3	4.60709
ENSMUSG00000041959	S100a10	4.6051
ENSMUSG00000021950	Anxa8	4.6018
ENSMUSG00000061882	Ccdc62	4.58689
ENSMUSG00000041362	4930506M07Rik	4.57921
ENSMUSG00000020032	Nuak1	4.5781
ENSMUSG00000072923	Gm10439	4.57801
ENSMUSG00000053268	Dspp	4.57123
ENSMUSG00000068113	Gm4907	4.56809
ENSMUSG00000027803	Wwtr1	4.56676
ENSMUSG00000055447	Cd47	4.56301
ENSMUSG00000022577	Ly6h	4.54631
ENSMUSG00000030659	Nucb2	4.53518
ENSMUSG00000053199	Arhgap20	4.53323
ENSMUSG00000035031	C8a	4.52881
ENSMUSG00000027533	Fabp5	4.52755
ENSMUSG00000022340	Sybu	4.51997
ENSMUSG00000024502	Jakmip2	4.51227
ENSMUSG00000044362	Ccdc89	4.51138
ENSMUSG00000024713	Pcsk5	4.5081
ENSMUSG00000058173	BC017612	4.50736
ENSMUSG00000038718	Pbx3	4.50429
ENSMUSG00000029661	Col1a2	4.49387
ENSMUSG00000021765	Fst	4.48545
ENSMUSG00000028571	Cyp2j13	4.48205
ENSMUSG00000043263	Pyhin1	4.47857
ENSMUSG00000039168	Dap	4.47681
ENSMUSG00000032726	Bmp8a	4.47427
ENSMUSG00000074472	Zfp872	4.46872
ENSMUSG00000049100	Pcdh10	4.46415
ENSMUSG00000024713	Pcsk5	4.45836
ENSMUSG00000022639	5330426P16Rik	4.45773
ENSMUSG00000020256	Aldh1l2	4.45552
ENSMUSG00000021097	Clmn	4.44762
ENSMUSG00000045868	Gvin1	4.44327
ENSMUSG00000046410	Kcnk6	4.43322
ENSMUSG00000040387	Klhl32	4.42988
ENSMUSG00000032719	Gm106	4.42694
ENSMUSG00000021097	Clmn	4.4267
ENSMUSG00000028246	6230409E13Rik	4.41298
ENSMUSG00000032265	Fam46a	4.41088
ENSMUSG00000036885	Arhgef26	4.40631
ENSMUSG00000001348	Acp5	4.40194
ENSMUSG00000048450	Msx1	4.40143
ENSMUSG00000038068	Rnf144b	4.40035
ENSMUSG00000003484	Cyp4f18	4.39281
ENSMUSG00000027803	Wwtr1	4.3882
ENSMUSG00000023391	Dlx2	4.37755
ENSMUSG00000034265	Zdhhc14	4.37257
ENSMUSG00000066704	Cyp2b19	4.35882
ENSMUSG00000032265	Fam46a	4.35003
ENSMUSG00000024691	Fam111a	4.34095
ENSMUSG00000036902	Neto2	4.33738
ENSMUSG00000028883	Sema3a	4.33685
ENSMUSG00000043487	Acot6	4.33278
ENSMUSG00000033182	Kbtbd12	4.33243
ENSMUSG00000041468	Gpr12	4.33022
ENSMUSG00000025790	Slco3a1	4.32451
ENSMUSG00000047730	Fcgbp	4.31783
ENSMUSG00000075297	H60b	4.31598
ENSMUSG00000020326	Ccng1	4.31405
ENSMUSG00000052713	Zfp608	4.30872
ENSMUSG00000037989	Wnk2	4.30696
ENSMUSG00000040022	Rab11fip2	4.30387
ENSMUSG00000045639	Zfp629	4.29811
ENSMUSG00000052917	Senp7	4.29508
ENSMUSG00000036790	Slitrk2	4.29403
ENSMUSG00000022875	Kng1	4.29319
ENSMUSG00000055125	M5C1000I18Rik	4.28987
ENSMUSG00000069114	Zbtb10	4.28808
ENSMUSG00000034612	Chst11	4.28575
ENSMUSG00000022297	Fzd6	4.28432
ENSMUSG00000041757	Plekha6	4.28292
ENSMUSG00000026259	Ngef	4.26376
ENSMUSG00000032656	2012-03-03	4.25729
ENSMUSG00000025779	Ly96	4.25598
ENSMUSG00000056758	Hmga2	4.24294
ENSMUSG00000022297	Fzd6	4.24187
ENSMUSG00000027859	Ngf	4.23939
ENSMUSG00000046876	Atxn1	4.23832
ENSMUSG00000010825	Grid2ip	4.23571
ENSMUSG00000068196	Col8a1	4.23362
ENSMUSG00000010825	Grid2ip	4.23034
ENSMUSG00000023443	Esx1	4.2273
ENSMUSG00000032369	Plscr1	4.22513
ENSMUSG00000003882	Il7r	4.22233
ENSMUSG00000031111	Igsf1	4.22192
ENSMUSG00000035274	Tpbg	4.22105
ENSMUSG00000044026	Tmem20	4.19429
ENSMUSG00000000861	Bcl11a	4.19325
ENSMUSG00000060459	Kng2	4.19288
ENSMUSG00000039853	Trim14	4.18625
ENSMUSG00000052854	Nrk	4.18228
ENSMUSG00000036273	Lrrk2	4.18095
ENSMUSG00000048502	Duxbl	4.17735
ENSMUSG00000027220	Syt13	4.17315
ENSMUSG00000052917	Senp7	4.17314
ENSMUSG00000022508	Bcl6	4.16594
ENSMUSG00000026247	Ecel1	4.16093
ENSMUSG00000044819	Oxgr1	4.15922
ENSMUSG00000024887	Asah2	4.15412
ENSMUSG00000032511	Scn5a	4.15302
ENSMUSG00000021589	Rhobtb3	4.15045
ENSMUSG00000031990	Jam3	4.14117
ENSMUSG00000005917	Otx1	4.12548
ENSMUSG00000049929	Lpar4	4.12484
ENSMUSG00000057068	Fam47e	4.11948
ENSMUSG00000026259	Ngef	4.11868
ENSMUSG00000030075	Cntn3	4.11771
ENSMUSG00000058317	Ube2e2	4.11707
ENSMUSG00000022587	Ly6e	4.11567
ENSMUSG00000022587	Ly6e	4.11402
ENSMUSG00000020303	Stc2	4.11278
ENSMUSG00000067649	Mageb18	4.1103
ENSMUSG00000054374	9330176C04Rik	4.10487
ENSMUSG00000022587	Ly6e	4.10171
ENSMUSG00000033083	Tbc1d4	4.09107
ENSMUSG00000056214	Pard6g	4.08981
ENSMUSG00000021750	Fam107a	4.088
ENSMUSG00000025278	Flnb	4.08423
ENSMUSG00000037940	Inpp4b	4.08363
ENSMUSG00000022871	Fetub	4.08051
ENSMUSG00000022587	Ly6e	4.07603
ENSMUSG00000035274	Tpbg	4.07346
ENSMUSG00000073418	C4b	4.07263
ENSMUSG00000040852	Plekhh2	4.07115
ENSMUSG00000022587	Ly6e	4.06851
ENSMUSG00000022587	Ly6e	4.06346
ENSMUSG00000063146	Clip2	4.05804
ENSMUSG00000063146	Clip2	4.05791
ENSMUSG00000047793	Sned1	4.05549
ENSMUSG00000016179	Camk1g	4.05333
ENSMUSG00000026986	Hnmt	4.05333
ENSMUSG00000038776	Ephx1	4.05278
ENSMUSG00000025809	Itgb1	4.05227
ENSMUSG00000038496	Slc19a3	4.05038
ENSMUSG00000021768	Dusp13	4.0489
ENSMUSG00000086085	5730422E09Rik	4.0489
ENSMUSG00000027695	Pld1	4.04758
ENSMUSG00000036095	Dgkb	4.04669
ENSMUSG00000088675	RNaseP_nuc	4.04638
ENSMUSG00000017491	Rarb	4.04448
ENSMUSG00000022715	Cldn26	4.04448
ENSMUSG00000074491	Clec4g	4.04448
ENSMUSG00000031616	Ednra	4.04163
ENSMUSG00000004359	Spic	4.04006
ENSMUSG00000005583	Mef2c	4.04006
ENSMUSG00000030670	Cyp2r1	4.04006
ENSMUSG00000059003	Grin2a	4.03564
ENSMUSG00000025997	Ikzf2	4.02912
ENSMUSG00000031965	Tbx20	4.02506
ENSMUSG00000052520	Cyp2j5	4.01936
ENSMUSG00000026399	Cd55	4.01434
ENSMUSG00000028521	Slc35d1	3.99186
ENSMUSG00000031877	Ces2g	3.98725
ENSMUSG00000038068	Rnf144b	3.98642
ENSMUSG00000030554	Synm	3.98615
ENSMUSG00000059325	Hopx	3.98232
ENSMUSG00000021701	Plk2	3.97842
ENSMUSG00000041912	Tdrkh	3.97673
ENSMUSG00000048482	Bdnf	3.97466
ENSMUSG00000037902	Sirpa	3.9736
ENSMUSG00000041757	Plekha6	3.97295
ENSMUSG00000022105	Rb1	3.96466
ENSMUSG00000030131	Mug2	3.95093
ENSMUSG00000025268	Maged2	3.93971
ENSMUSG00000056427	Slit3	3.93958
ENSMUSG00000024304	Cdh2	3.93589
ENSMUSG00000022265	Ank	3.93414
ENSMUSG00000073424	Cyp4f15	3.93366
ENSMUSG00000078247	Airn	3.9312
ENSMUSG00000030554	Synm	3.92899
ENSMUSG00000041607	Mbp	3.92755
ENSMUSG00000040213	Ccbl2	3.91986
ENSMUSG00000031521	Aga	3.91808
ENSMUSG00000031555	Adam9	3.91805
ENSMUSG00000026029	Casp8	3.91764
ENSMUSG00000022871	Fetub	3.91657
ENSMUSG00000066154	Mup3	3.91559
ENSMUSG00000000420	Galnt1	3.91078
ENSMUSG00000045573	Penk	3.90836
ENSMUSG00000070601	Vmn2r84	3.90505
ENSMUSG00000037490	Slc2a12	3.90051
ENSMUSG00000045034	Ankrd34b	3.90051
ENSMUSG00000072889	Nfxl1	3.89606
ENSMUSG00000087651	1500009L16Rik	3.89234
ENSMUSG00000002265	Peg3	3.88708
ENSMUSG00000027695	Pld1	3.87437
ENSMUSG00000042686	Jph1	3.86963
ENSMUSG00000073725	Lmbrd1	3.86439
ENSMUSG00000026029	Casp8	3.86073
ENSMUSG00000063889	Crem	3.8596
ENSMUSG00000045038	Prkce	3.85585
ENSMUSG00000039257	Vstm2b	3.85473
ENSMUSG00000000420	Galnt1	3.85141
ENSMUSG00000026664	Phyh	3.84202
ENSMUSG00000032263	Bckdhb	3.833
ENSMUSG00000060212	Pcnxl2	3.82594
ENSMUSG00000078247	Airn	3.82552
ENSMUSG00000053580	Tanc2	3.82418
ENSMUSG00000002265	Peg3	3.82415
ENSMUSG00000031111	Igsf1	3.81973
ENSMUSG00000028145	Them4	3.81445
ENSMUSG00000023827	Agpat4	3.81396
ENSMUSG00000026514	Cnih3	3.81345
ENSMUSG00000070837	Aurkc	3.80314
ENSMUSG00000037062	Sh3glb1	3.8026
ENSMUSG00000028476	Reck	3.8023
ENSMUSG00000003505	Psg18	3.79766
ENSMUSG00000031965	Tbx20	3.79544
ENSMUSG00000067786	Nnat	3.79328
ENSMUSG00000026600	Soat1	3.78531
ENSMUSG00000042271	Nxt2	3.77837
ENSMUSG00000069314	Hist1h2bl	3.77752
ENSMUSG00000042105	Inpp5f	3.77451
ENSMUSG00000072735	Gm10406	3.76807
ENSMUSG00000037902	Sirpa	3.76624
ENSMUSG00000004085	B230120H23Rik	3.76467
ENSMUSG00000005355	Casp14	3.76096
ENSMUSG00000075334	Rprm	3.75891
ENSMUSG00000020000	Moxd1	3.75831
ENSMUSG00000026544	Dusp23	3.75742
ENSMUSG00000030554	Synm	3.7564
ENSMUSG00000033585	Ndn	3.75521
ENSMUSG00000021318	Gli3	3.74896
ENSMUSG00000073538	E330020D12Rik	3.74047
ENSMUSG00000021823	Vcl	3.73763
ENSMUSG00000047242	Taf9b	3.71635
ENSMUSG00000070858	Gm1673	3.7154
ENSMUSG00000021604	Irx4	3.70846
ENSMUSG00000056025	Clca1	3.70691
ENSMUSG00000034723	Tmx4	3.70367
ENSMUSG00000040102	Klhdc5	3.70309
ENSMUSG00000049100	Pcdh10	3.6963
ENSMUSG00000031532	Tmem66	3.69356
ENSMUSG00000008999	Bmp7	3.69046
ENSMUSG00000022871	Fetub	3.68887
ENSMUSG00000029123	Stk32b	3.68881
ENSMUSG00000034620	Tmem5	3.68583
ENSMUSG00000033788	Dysf	3.68485
ENSMUSG00000044674	Fzd1	3.68418
ENSMUSG00000028698	Pik3r3	3.67962
ENSMUSG00000025935	Tram1	3.67801
ENSMUSG00000034472	Rasd2	3.67287
ENSMUSG00000031119	Gpc4	3.6714
ENSMUSG00000043760	Pkhd1	3.66056
ENSMUSG00000034677	Gpr142	3.65614
ENSMUSG00000044313	Mab21l3	3.65565
ENSMUSG00000041607	Mbp	3.64665
ENSMUSG00000063889	Crem	3.64101
ENSMUSG00000037902	Sirpa	3.63426
ENSMUSG00000047242	Taf9b	3.63408
ENSMUSG00000031284	Pak3	3.63408
ENSMUSG00000039911	Spsb1	3.6333
ENSMUSG00000026123	Plekhb2	3.62851
ENSMUSG00000062397	Zfp706	3.62785
ENSMUSG00000032289	Thsd4	3.62722
ENSMUSG00000027605	Acss2	3.61963
ENSMUSG00000036611	Eepd1	3.61724
ENSMUSG00000022113	Trim52	3.61588
ENSMUSG00000045094	Arhgef37	3.61478
ENSMUSG00000037541	Shank2	3.61434
ENSMUSG00000022629	Kif21a	3.61427
ENSMUSG00000045201	Lrrc3b	3.61367
ENSMUSG00000073130	Gm1141	3.61367
ENSMUSG00000039232	Stx11	3.60925
ENSMUSG00000040364	Sec1	3.60671
ENSMUSG00000022629	Kif21a	3.60396
ENSMUSG00000005886	Ncoa2	3.59386
ENSMUSG00000025876	Unc5a	3.58947
ENSMUSG00000005886	Ncoa2	3.58904
ENSMUSG00000005251	Ripk4	3.58546
ENSMUSG00000029098	Acox3	3.58514
ENSMUSG00000063889	Crem	3.58476
ENSMUSG00000028730	Wdr65	3.582
ENSMUSG00000052949	Rnf157	3.57902
ENSMUSG00000057068	Fam47e	3.57439
ENSMUSG00000031111	Igsf1	3.57262
ENSMUSG00000036790	Slitrk2	3.5714
ENSMUSG00000040616	Tmem51	3.56999
ENSMUSG00000022629	Kif21a	3.5672
ENSMUSG00000070526	Peg12	3.56605
ENSMUSG00000021087	Rtn1	3.56587
ENSMUSG00000015619	Gata3	3.56303
ENSMUSG00000017211	Gsdma2	3.5594
ENSMUSG00000056553	Ptprn2	3.55514
ENSMUSG00000021930	6330409N04Rik	3.55455
ENSMUSG00000048186	Bend7	3.54802
ENSMUSG00000024521	Pmaip1	3.53279
ENSMUSG00000026421	Csrp1	3.5323
ENSMUSG00000027907	S100a11	3.53215
ENSMUSG00000045658	Pid1	3.53041
ENSMUSG00000025083	Afap1l2	3.52732
ENSMUSG00000022577	Ly6h	3.52376
ENSMUSG00000070601	Vmn2r84	3.51905
ENSMUSG00000066850	Vmn1r65	3.51383
ENSMUSG00000032289	Thsd4	3.50944
ENSMUSG00000071537	Klrg2	3.50941
ENSMUSG00000070777	Ceacam20	3.49949
ENSMUSG00000053253	Ndfip2	3.49947
ENSMUSG00000063889	Crem	3.49936
ENSMUSG00000039065	Fam173b	3.49801
ENSMUSG00000060961	Slc4a4	3.49505
ENSMUSG00000045180	Shroom2	3.48889
ENSMUSG00000079507	H2-Q2	3.48312
ENSMUSG00000031937	2200002K05Rik	3.48244
ENSMUSG00000054087	Fbxw14	3.48177
ENSMUSG00000028182	Lrriq3	3.47744
ENSMUSG00000033063	Cntnap3	3.47744
ENSMUSG00000049252	Lrp1b	3.47744
ENSMUSG00000039934	Pion	3.47449
ENSMUSG00000044597	Mycs	3.47302
ENSMUSG00000057315	Arhgap24	3.47302
ENSMUSG00000032358	Fam83b	3.46986
ENSMUSG00000045994	B3gat1	3.46948
ENSMUSG00000066456	Hmgn3	3.46909
ENSMUSG00000024124	Prss30	3.4686
ENSMUSG00000025105	Bnc1	3.4686
ENSMUSG00000026258	3110079O15Rik	3.4686
ENSMUSG00000031780	Ccl17	3.4686
ENSMUSG00000032181	Scg3	3.4686
ENSMUSG00000050014	Apol10b	3.4686
ENSMUSG00000055471	Alk	3.4686
ENSMUSG00000086541	Has2as	3.4686
ENSMUSG00000026548	Slamf9	3.46733
ENSMUSG00000029299	Abcg3	3.46638
ENSMUSG00000036368	Fam82a1	3.46638
ENSMUSG00000049608	Gpr55	3.46417
ENSMUSG00000033788	Dysf	3.4633
ENSMUSG00000035456	Prdm8	3.43829
ENSMUSG00000033740	St18	3.43816
ENSMUSG00000038522	AI317395	3.43721
ENSMUSG00000060961	Slc4a4	3.43407
ENSMUSG00000064703	U6	3.43394
ENSMUSG00000022629	Kif21a	3.43289
ENSMUSG00000053253	Ndfip2	3.43239
ENSMUSG00000004347	Pde1c	3.43144
ENSMUSG00000073408	Dpcr1	3.42225
ENSMUSG00000040022	Rab11fip2	3.4206
ENSMUSG00000056870	Gulp1	3.41946
ENSMUSG00000031898	Dpep3	3.41504
ENSMUSG00000037833	Sh2d4b	3.41322
ENSMUSG00000070686	C87414	3.40867
ENSMUSG00000022641	Bbx	3.39916
ENSMUSG00000033174	Mgll	3.39717
ENSMUSG00000041261	Car8	3.38851
ENSMUSG00000037234	Hook3	3.38436
ENSMUSG00000030495	Slc7a10	3.38142
ENSMUSG00000033174	Mgll	3.3792
ENSMUSG00000022092	Ppp3cc	3.37556
ENSMUSG00000051262	Cml3	3.3727
ENSMUSG00000025790	Slco3a1	3.36814
ENSMUSG00000022184	Fbxo4	3.36437
ENSMUSG00000066456	Hmgn3	3.35342
ENSMUSG00000021453	Gadd45g	3.35338
ENSMUSG00000040003	Magi2	3.35209
ENSMUSG00000033491	Prss35	3.34999
ENSMUSG00000026836	Acvr1	3.34801
ENSMUSG00000022844	Pdia5	3.3478
ENSMUSG00000078624	Olfr613	3.34663
ENSMUSG00000051331	Cacna1c	3.34553
ENSMUSG00000056708	Ier5	3.34427
ENSMUSG00000014329	Bicc1	3.3357
ENSMUSG00000024109	Nrxn1	3.3349
ENSMUSG00000022537	Tmem44	3.33463
ENSMUSG00000072653	Zfp783	3.33449
ENSMUSG00000026836	Acvr1	3.33352
ENSMUSG00000027977	Ndst3	3.33322
ENSMUSG00000044857	Lemd2	3.33304
ENSMUSG00000051228	Nyx	3.32984
ENSMUSG00000037813	D630003M21Rik	3.32794
ENSMUSG00000047246	Hist1h2be	3.32037
ENSMUSG00000059810	Rgs3	3.31953
ENSMUSG00000047842	Diras2	3.31519
ENSMUSG00000044528	Tram1l1	3.31277
ENSMUSG00000020121	Srgap1	3.30912
ENSMUSG00000027869	Hsd3b6	3.30831
ENSMUSG00000032854	Ugt8a	3.30137
ENSMUSG00000000489	Pdgfb	3.3004
ENSMUSG00000028796	Phc2	3.30015
ENSMUSG00000024083	Pja2	3.29831
ENSMUSG00000024083	Pja2	3.29624
ENSMUSG00000070509	Rgma	3.29583
ENSMUSG00000035540	Gc	3.29517
ENSMUSG00000033174	Mgll	3.28676
ENSMUSG00000038372	Gmds	3.28504
ENSMUSG00000043639	Rbm20	3.27707
ENSMUSG00000027840	Wnt2b	3.2759
ENSMUSG00000028108	Ecm1	3.27556
ENSMUSG00000055963	Gm11818	3.27221
ENSMUSG00000079247	Gm13691	3.26413
ENSMUSG00000074865	Zfp934	3.25904
ENSMUSG00000024479	Mal2	3.25853
ENSMUSG00000026836	Acvr1	3.25507
ENSMUSG00000040118	Cacna2d1	3.25465
ENSMUSG00000025779	Ly96	3.25197
ENSMUSG00000020423	Btg2	3.24797
ENSMUSG00000037855	Zfp365	3.24643
ENSMUSG00000025255	Zfhx4	3.24613
ENSMUSG00000026686	Lmx1a	3.24434
ENSMUSG00000039081	Zfp503	3.24175
ENSMUSG00000044542	Prop1	3.23833
ENSMUSG00000078452	Raet1d	3.23784
ENSMUSG00000042842	Serpinb6b	3.23688
ENSMUSG00000033327	Tnxb	3.2347
ENSMUSG00000035356	Nfkbiz	3.23441
ENSMUSG00000026305	Lrrfip1	3.23401
ENSMUSG00000039747	Orai2	3.22439
ENSMUSG00000049692	4933425O20Rik	3.22222
ENSMUSG00000016382	Pls3	3.22198
ENSMUSG00000019789	Hey2	3.2201
ENSMUSG00000033781	Asb13	3.21898
ENSMUSG00000040118	Cacna2d1	3.21745
ENSMUSG00000030760	Acer3	3.20746
ENSMUSG00000016382	Pls3	3.20609
ENSMUSG00000017314	Mpp2	3.20281
ENSMUSG00000063889	Crem	3.20021
ENSMUSG00000057406	Whsc1	3.19674
ENSMUSG00000058690	Gcap14	3.19568
ENSMUSG00000030873	Scnn1b	3.19284
ENSMUSG00000005103	Wdr1	3.18584
ENSMUSG00000047959	Kcna3	3.18433
ENSMUSG00000034488	Edil3	3.18286
ENSMUSG00000016382	Pls3	3.18234
ENSMUSG00000050050	Ccdc158	3.18212
ENSMUSG00000018126	Baiap2l2	3.18198
ENSMUSG00000022676	Snai2	3.18101
ENSMUSG00000020123	Avpr1a	3.18065
ENSMUSG00000032238	Rora	3.18065
ENSMUSG00000056004	9330182L06Rik	3.17955
ENSMUSG00000000248	Clec2g	3.1794
ENSMUSG00000079247	Gm13691	3.1776
ENSMUSG00000048763	Hoxb3	3.17663
ENSMUSG00000004347	Pde1c	3.17549
ENSMUSG00000055022	Cntn1	3.17513
ENSMUSG00000079247	Gm13691	3.17226
ENSMUSG00000030849	Fgfr2	3.17058
ENSMUSG00000040118	Cacna2d1	3.16883
ENSMUSG00000063626	Unc5d	3.16562
ENSMUSG00000090158	Gm7609	3.16552
ENSMUSG00000041417	Pik3r1	3.16509
ENSMUSG00000004383	Large	3.16179
ENSMUSG00000004270	Lpcat3	3.16085
ENSMUSG00000071103	1700029J07Rik	3.16016
ENSMUSG00000041417	Pik3r1	3.15967
ENSMUSG00000030557	Mef2a	3.15082
ENSMUSG00000043153	Ispd	3.14015
ENSMUSG00000058690	Gcap14	3.13562
ENSMUSG00000040118	Cacna2d1	3.13316
ENSMUSG00000063889	Crem	3.12872
ENSMUSG00000035277	Arx	3.12851
ENSMUSG00000063889	Crem	3.12554
ENSMUSG00000021747	4930452B06Rik	3.12005
ENSMUSG00000044519	Zfp488	3.11946
ENSMUSG00000026623	Lpgat1	3.11918
ENSMUSG00000026017	Carf	3.11666
ENSMUSG00000015305	Sash1	3.11477
ENSMUSG00000040128	Pnrc1	3.11447
ENSMUSG00000023951	Vegfa	3.10995
ENSMUSG00000026623	Lpgat1	3.10912
ENSMUSG00000019873	Reep3	3.10821
ENSMUSG00000019907	Ppp1r12a	3.10344
ENSMUSG00000090071	Cdk5r2	3.1034
ENSMUSG00000063172	Hspb11	3.10162
ENSMUSG00000042271	Nxt2	3.09919
ENSMUSG00000039270	Megf9	3.09649
ENSMUSG00000037541	Shank2	3.09338
ENSMUSG00000023913	Pla2g7	3.09316
ENSMUSG00000063889	Crem	3.09273
ENSMUSG00000038576	Susd4	3.09195
ENSMUSG00000050865	Olfr1494	3.08909
ENSMUSG00000040003	Magi2	3.08804
ENSMUSG00000051331	Cacna1c	3.08762
ENSMUSG00000026305	Lrrfip1	3.086
ENSMUSG00000023764	Sfi1	3.082
ENSMUSG00000037660	Gdf7	3.08172
ENSMUSG00000057982	Zfp809	3.08139
ENSMUSG00000020883	Fbxl20	3.07888
ENSMUSG00000030849	Fgfr2	3.07865
ENSMUSG00000031608	Galnt7	3.07774
ENSMUSG00000030761	Myo7a	3.07434
ENSMUSG00000030465	Psd3	3.07064
ENSMUSG00000066442	Mthfs	3.07011
ENSMUSG00000021972	Hmbox1	3.06892
ENSMUSG00000048970	C1galt1c1	3.06694
ENSMUSG00000057337	Chst3	3.06452
ENSMUSG00000052331	Ankrd44	3.06197
ENSMUSG00000002107	Celf2	3.06049
ENSMUSG00000048107	Kctd12	3.05822
ENSMUSG00000002107	Celf2	3.04986
ENSMUSG00000029571	Tmem106b	3.04891
ENSMUSG00000033520	Idi2	3.04462
ENSMUSG00000039263	Npepl1	3.03896
ENSMUSG00000054702	Ap1s3	3.03674
ENSMUSG00000050912	Tmem123	3.0332
ENSMUSG00000020099	Unc5b	3.02944
ENSMUSG00000040329	Il7	3.02707
ENSMUSG00000023951	Vegfa	3.02038
ENSMUSG00000001630	Stk38l	3.02024
ENSMUSG00000029337	Fgf5	3.01966
ENSMUSG00000039232	Stx11	3.01937
ENSMUSG00000057982	Zfp809	3.01743
ENSMUSG00000034807	Glt25d1	3.01496
ENSMUSG00000067851	Arfgef1	3.01392
ENSMUSG00000055485	9830001H06Rik	3.01286
ENSMUSG00000024027	Glp1r	3.01069
ENSMUSG00000038473	Nos1ap	3.00772
ENSMUSG00000068250	Amn1	3.00671
ENSMUSG00000074607	Tox2	3.00612
ENSMUSG00000026688	Mgst3	3.00423
ENSMUSG00000002107	Celf2	3.00296
ENSMUSG00000023951	Vegfa	3.00116
ENSMUSG00000035376	Ptplb	2.99988
ENSMUSG00000049904	Tmem17	2.99516
ENSMUSG00000025925	Terf1	2.99335
ENSMUSG00000040374	Pxmp3	2.99315
ENSMUSG00000036894	Rap2b	2.99303
ENSMUSG00000079111	Kdelr2	2.99249
ENSMUSG00000063889	Crem	2.99071
ENSMUSG00000056091	St3gal5	2.98939
ENSMUSG00000066007	Zfp600	2.98357
ENSMUSG00000022120	Rnf219	2.98047
ENSMUSG00000020570	Sypl	2.9758
ENSMUSG00000056091	St3gal5	2.9742
ENSMUSG00000002107	Celf2	2.97416
ENSMUSG00000058254	Tspan7	2.97414
ENSMUSG00000038145	Snrk	2.97386
ENSMUSG00000051951	Xkr4	2.96987
ENSMUSG00000023073	Slc10a2	2.968
ENSMUSG00000039841	Zfp800	2.96794
ENSMUSG00000040374	Pxmp3	2.96619
ENSMUSG00000026305	Lrrfip1	2.96602
ENSMUSG00000029193	Cckar	2.96596
ENSMUSG00000026740	Dnajc1	2.96548
ENSMUSG00000038331	Satb2	2.961
ENSMUSG00000041046	Ramp3	2.95898
ENSMUSG00000049115	Agtr1a	2.95866
ENSMUSG00000031750	Il34	2.95809
ENSMUSG00000020037	Rfx4	2.95424
ENSMUSG00000078437	Gm3055	2.95308
ENSMUSG00000065999	Gm13154	2.95188
ENSMUSG00000070798	Psg25	2.95077
ENSMUSG00000055415	Atp10b	2.94902
ENSMUSG00000040374	Pxmp3	2.94889
ENSMUSG00000017144	Rnd3	2.94691
ENSMUSG00000035799	Twist1	2.94248
ENSMUSG00000029233	Srd5a3	2.94052
ENSMUSG00000074867	Zfp808	2.93772
ENSMUSG00000046985	Tapt1	2.93626
ENSMUSG00000021364	Elovl2	2.93609
ENSMUSG00000040374	Pxmp3	2.926
ENSMUSG00000035594	Chrna5	2.92569
ENSMUSG00000035356	Nfkbiz	2.92357
ENSMUSG00000020570	Sypl	2.92092
ENSMUSG00000046610	5330437I02Rik	2.91964
ENSMUSG00000031608	Galnt7	2.91803
ENSMUSG00000002107	Celf2	2.91513
ENSMUSG00000029171	Pgm1	2.9142
ENSMUSG00000020621	Rdh14	2.91217
ENSMUSG00000042460	C1galt1	2.9105
ENSMUSG00000025040	Fundc1	2.90754
ENSMUSG00000060301	2610008E11Rik	2.90223
ENSMUSG00000020474	Polm	2.89725
ENSMUSG00000025380	Fscn2	2.89713
ENSMUSG00000029658	Wdr95	2.89713
ENSMUSG00000031212	Pgr15l	2.89713
ENSMUSG00000041798	Gck	2.89565
ENSMUSG00000026567	Adcy10	2.89492
ENSMUSG00000025551	Fgf14	2.89271
ENSMUSG00000036961	Wnt8b	2.89271
ENSMUSG00000037818	3110057O12Rik	2.89271
ENSMUSG00000040569	Slc26a7	2.89271
ENSMUSG00000026360	Rgs2	2.89094
ENSMUSG00000026094	Stk17b	2.89059
ENSMUSG00000009569	Mkl2	2.8905
ENSMUSG00000051839	Gypa	2.8905
ENSMUSG00000039661	Dusp26	2.89005
ENSMUSG00000039942	Ptger4	2.88999
ENSMUSG00000025889	Snca	2.88939
ENSMUSG00000013483	Card14	2.88927
ENSMUSG00000021768	Dusp13	2.88829
ENSMUSG00000022523	Fgf12	2.88829
ENSMUSG00000024696	Lpxn	2.88829
ENSMUSG00000039913	Pak7	2.88829
ENSMUSG00000041872	Il17f	2.88829
ENSMUSG00000054102	Nlrp9a	2.88829
ENSMUSG00000060715	1700019A02Rik	2.88829
ENSMUSG00000035356	Nfkbiz	2.88445
ENSMUSG00000026241	Nppc	2.88387
ENSMUSG00000036907	C1ql2	2.88387
ENSMUSG00000037860	Aim2	2.88381
ENSMUSG00000040374	Pxmp3	2.88106
ENSMUSG00000021339	Mrs2	2.87798
ENSMUSG00000034457	Eda2r	2.87771
ENSMUSG00000070837	Aurkc	2.87405
ENSMUSG00000024150	Mcfd2	2.87398
ENSMUSG00000021636	Marveld2	2.8669
ENSMUSG00000058665	En1	2.85931
ENSMUSG00000025981	Coq10b	2.85921
ENSMUSG00000002107	Celf2	2.85682
ENSMUSG00000024150	Mcfd2	2.85383
ENSMUSG00000022687	Boc	2.85188
ENSMUSG00000022965	Ifngr2	2.84714
ENSMUSG00000034457	Eda2r	2.84652
ENSMUSG00000066152	Slc31a2	2.84641
ENSMUSG00000040374	Pxmp3	2.8456
ENSMUSG00000056306	6030405A18Rik	2.84465
ENSMUSG00000068876	Cgn	2.84408
ENSMUSG00000031641	Cbr4	2.83906
ENSMUSG00000038145	Snrk	2.83762
ENSMUSG00000070501	BC094916	2.83721
ENSMUSG00000015652	Steap1	2.83635
ENSMUSG00000033949	Trim36	2.83586
ENSMUSG00000004113	Cacna1b	2.83196
ENSMUSG00000057406	Whsc1	2.83055
ENSMUSG00000072680	D14Ertd449e	2.83025
ENSMUSG00000054277	Arfgap3	2.82888
ENSMUSG00000047139	Cd24a	2.82498
ENSMUSG00000079173	Zan	2.82479
ENSMUSG00000022498	Txndc11	2.82418
ENSMUSG00000032501	Trib1	2.82056
ENSMUSG00000002428	Hltf	2.81949
ENSMUSG00000039202	Abhd2	2.81697
ENSMUSG00000057406	Whsc1	2.81659
ENSMUSG00000020609	Apob	2.81658
ENSMUSG00000038732	Mboat1	2.81615
ENSMUSG00000029026	Trp73	2.81581
ENSMUSG00000032531	Amotl2	2.81556
ENSMUSG00000078453	3110003A17Rik	2.81555
ENSMUSG00000066007	Zfp600	2.81483
ENSMUSG00000044501	Zfp758	2.81069
ENSMUSG00000031246	Sh3bgrl	2.81026
ENSMUSG00000029595	Lhx5	2.80995
ENSMUSG00000074591	Gm410	2.809
ENSMUSG00000029026	Trp73	2.80434
ENSMUSG00000025020	Slit1	2.80133
ENSMUSG00000020689	Itgb3	2.79492
ENSMUSG00000038984	Tspyl5	2.79476
ENSMUSG00000070407	Hs3st3b1	2.79441
ENSMUSG00000025666	Tmem47	2.78945
ENSMUSG00000082999	Gm13238	2.78677
ENSMUSG00000020520	Galnt10	2.78196
ENSMUSG00000041014	Nrg3	2.78194
ENSMUSG00000026773	Pfkfb3	2.78104
ENSMUSG00000003051	Elf3	2.7792
ENSMUSG00000045215	Asxl3	2.77455
ENSMUSG00000067919	Gm13138	2.7742
ENSMUSG00000004113	Cacna1b	2.77355
ENSMUSG00000063687	Pcdhb5	2.76448
ENSMUSG00000062014	Gmfb	2.76438
ENSMUSG00000028036	Ptgfr	2.7639
ENSMUSG00000026672	Optn	2.7601
ENSMUSG00000033949	Trim36	2.75798
ENSMUSG00000011256	Adam19	2.75702
ENSMUSG00000028161	Ppp3ca	2.75277
ENSMUSG00000028610	Dmrtb1	2.75272
ENSMUSG00000002799	Jag2	2.74849
ENSMUSG00000042063	Zfp386	2.74835
ENSMUSG00000005131	4930550C14Rik	2.74763
ENSMUSG00000042514	Klhl14	2.74652
ENSMUSG00000008206	Lass4	2.74595
ENSMUSG00000059852	Kcng2	2.74487
ENSMUSG00000002459	Rgs20	2.74483
ENSMUSG00000028995	Fam126a	2.74398
ENSMUSG00000025776	Crispld1	2.74345
ENSMUSG00000028063	Lmna	2.74273
ENSMUSG00000038780	Smurf1	2.74086
ENSMUSG00000038400	Pmepa1	2.73747
ENSMUSG00000072680	D14Ertd449e	2.72562
ENSMUSG00000078452	Raet1d	2.72368
ENSMUSG00000058056	Palld	2.72317
ENSMUSG00000042476	Abcb4	2.72213
ENSMUSG00000028381	Ugcg	2.7213
ENSMUSG00000034252	Senp6	2.71984
ENSMUSG00000038780	Smurf1	2.71792
ENSMUSG00000066829	Zfp810	2.71318
ENSMUSG00000026773	Pfkfb3	2.70977
ENSMUSG00000040601	Nlrp4a	2.70879
ENSMUSG00000034255	Arhgap27	2.70652
ENSMUSG00000040374	Pxmp3	2.70631
ENSMUSG00000038521	C1s	2.70625
ENSMUSG00000026773	Pfkfb3	2.7058
ENSMUSG00000021432	Slc35b3	2.70525
ENSMUSG00000026604	Ptpn14	2.70432
ENSMUSG00000020601	Trib2	2.70373
ENSMUSG00000073910	Mobkl2b	2.70321
ENSMUSG00000034620	Tmem5	2.70258
ENSMUSG00000026773	Pfkfb3	2.70089
ENSMUSG00000044164	Rnf182	2.69927
ENSMUSG00000057315	Arhgap24	2.69927
ENSMUSG00000062743	Zfp677	2.69925
ENSMUSG00000021198	Unc79	2.6978
ENSMUSG00000061603	Akap6	2.6978
ENSMUSG00000003051	Elf3	2.69709
ENSMUSG00000029026	Trp73	2.69667
ENSMUSG00000030605	Mfge8	2.69474
ENSMUSG00000086566	2810429I04Rik	2.69329
ENSMUSG00000028399	Ptprd	2.6926
ENSMUSG00000034040	Wbscr17	2.68808
ENSMUSG00000026586	Prrx1	2.68517
ENSMUSG00000070570	Slc17a7	2.68296
ENSMUSG00000068923	Syt11	2.6802
ENSMUSG00000000248	Clec2g	2.67919
ENSMUSG00000021432	Slc35b3	2.67846
ENSMUSG00000078776	9530053A07Rik	2.67818
ENSMUSG00000015597	Zfp318	2.67503
ENSMUSG00000034457	Eda2r	2.67441
ENSMUSG00000031750	Il34	2.67037
ENSMUSG00000028256	Odf2l	2.66554
ENSMUSG00000078452	Raet1d	2.6655
ENSMUSG00000031770	Herpud1	2.66176
ENSMUSG00000027761	Aadac	2.65881
ENSMUSG00000055254	Ntrk2	2.65881
ENSMUSG00000033350	Chst2	2.6565
ENSMUSG00000021010	Npas3	2.65591
ENSMUSG00000034255	Arhgap27	2.6522
ENSMUSG00000047033	Pcdhb15	2.65157
ENSMUSG00000068252	Apol7b	2.65145
ENSMUSG00000022883	Robo1	2.64954
ENSMUSG00000026443	Lrrn2	2.64148
ENSMUSG00000030605	Mfge8	2.6398
ENSMUSG00000040855	Reps2	2.63803
ENSMUSG00000016128	Stard13	2.6374
ENSMUSG00000062296	Trank1	2.63705
ENSMUSG00000027996	Sfrp2	2.6329
ENSMUSG00000048186	Bend7	2.6316
ENSMUSG00000022867	Usp25	2.63017
ENSMUSG00000026478	Lamc1	2.62958
ENSMUSG00000047045	Tmem164	2.62896
ENSMUSG00000026773	Pfkfb3	2.62759
ENSMUSG00000047261	Gap43	2.62634
ENSMUSG00000066877	Nck2	2.62515
ENSMUSG00000072591	5930412G12Rik	2.62491
ENSMUSG00000038132	Rbm24	2.62421
ENSMUSG00000074064	Mlycd	2.62385
ENSMUSG00000026773	Pfkfb3	2.62371
ENSMUSG00000026773	Pfkfb3	2.62301
ENSMUSG00000035566	Pcdh17	2.62301
ENSMUSG00000024487	Yipf5	2.6209
ENSMUSG00000026773	Pfkfb3	2.62071
ENSMUSG00000038248	Sobp	2.62063
ENSMUSG00000030822	Prr14	2.62014
ENSMUSG00000029650	Slc46a3	2.61683
ENSMUSG00000078670	Fam174b	2.61434
ENSMUSG00000033111	3830406C13Rik	2.60983
ENSMUSG00000066595	Mfsd7b	2.60653
ENSMUSG00000056679	Gpr173	2.60476
ENSMUSG00000024211	Grm8	2.60366
ENSMUSG00000017978	Cadps2	2.60255
ENSMUSG00000039321	Uts2r	2.60255
ENSMUSG00000021983	Atp8a2	2.60108
ENSMUSG00000027499	Pkia	2.60074
ENSMUSG00000051262	Cml3	2.59819
ENSMUSG00000038540	Tmc3	2.59813
ENSMUSG00000016128	Stard13	2.5951
ENSMUSG00000028256	Odf2l	2.59381
ENSMUSG00000042063	Zfp386	2.59135
ENSMUSG00000055480	Zfp458	2.5912
ENSMUSG00000036591	Arhgap21	2.5908
ENSMUSG00000027676	Ccdc39	2.58953
ENSMUSG00000051285	Pcmtd1	2.58735
ENSMUSG00000026031	Cflar	2.58121
ENSMUSG00000029094	Afap1	2.58032
ENSMUSG00000021432	Slc35b3	2.5796
ENSMUSG00000036591	Arhgap21	2.57848
ENSMUSG00000028063	Lmna	2.57592
ENSMUSG00000033111	3830406C13Rik	2.57447
ENSMUSG00000054843	Atrnl1	2.57345
ENSMUSG00000045912	C2cd4c	2.57011
ENSMUSG00000030519	Apba2	2.56933
ENSMUSG00000028063	Lmna	2.56749
ENSMUSG00000024603	Dctn4	2.56314
ENSMUSG00000026156	B3gat2	2.56096
ENSMUSG00000062464	Gm9705	2.56082
ENSMUSG00000074904	Gm906	2.55996
ENSMUSG00000021338	Lrrc16a	2.55958
ENSMUSG00000043811	Rtn4r	2.55857
ENSMUSG00000032338	Hcn4	2.55382
ENSMUSG00000021785	Ngly1	2.551
ENSMUSG00000039232	Stx11	2.54698
ENSMUSG00000029828	4921507P07Rik	2.5454
ENSMUSG00000041028	Ghitm	2.54392
ENSMUSG00000066677	Pydc3	2.54379
ENSMUSG00000038070	Cntln	2.54275
ENSMUSG00000040164	Kcns1	2.54202
ENSMUSG00000015597	Zfp318	2.53778
ENSMUSG00000026154	1110058L19Rik	2.53363
ENSMUSG00000027663	Zmat3	2.53338
ENSMUSG00000027344	Fsip1	2.52836
ENSMUSG00000044072	Eml6	2.5273
ENSMUSG00000055745	Ldoc1l	2.52688
ENSMUSG00000044816	D630023F18Rik	2.52268
ENSMUSG00000039942	Ptger4	2.52221
ENSMUSG00000002428	Hltf	2.52207
ENSMUSG00000038521	C1s	2.51999
ENSMUSG00000021033	Gstz1	2.51833
ENSMUSG00000023845	Lnpep	2.51807
ENSMUSG00000000301	Pemt	2.51803
ENSMUSG00000034066	Farp2	2.51657
ENSMUSG00000020525	Ppm1d	2.51523
ENSMUSG00000029772	Ahcyl2	2.51307
ENSMUSG00000047143	Dmrta2	2.5129
ENSMUSG00000045179	Sox3	2.51234
ENSMUSG00000078606	Gm4070	2.51185
ENSMUSG00000067365	Tmem128	2.50964
ENSMUSG00000082853	Gm7134	2.50878
ENSMUSG00000025475	Gpr123	2.50789
ENSMUSG00000031613	Hpgd	2.50731
ENSMUSG00000000861	Bcl11a	2.50682
ENSMUSG00000020607	Fam84a	2.50415
ENSMUSG00000047496	Rnf152	2.50075
ENSMUSG00000034435	Tmem30b	2.49817
ENSMUSG00000021895	Arhgef3	2.49476
ENSMUSG00000032402	Smad3	2.49261
ENSMUSG00000033060	Lmo7	2.49208
ENSMUSG00000019769	Syne1	2.49102
ENSMUSG00000052957	Gas1	2.48838
ENSMUSG00000039200	Atf7ip2	2.48748
ENSMUSG00000048763	Hoxb3	2.48556
ENSMUSG00000032269	Htr3a	2.47946
ENSMUSG00000020300	Cpeb4	2.4769
ENSMUSG00000037926	Ssh2	2.47624
ENSMUSG00000038729	Akap2	2.47504
ENSMUSG00000005609	Ctr9	2.47367
ENSMUSG00000039887	Alg14	2.47365
ENSMUSG00000038729	Akap2	2.47272
ENSMUSG00000027276	Jag1	2.47172
ENSMUSG00000063383	Zfp947	2.4704
ENSMUSG00000032243	Itga11	2.47029
ENSMUSG00000025981	Coq10b	2.46911
ENSMUSG00000057098	Ebf1	2.46852
ENSMUSG00000037104	Socs5	2.46634
ENSMUSG00000035067	Xkr6	2.46625
ENSMUSG00000030104	Edem1	2.46558
ENSMUSG00000038729	Akap2	2.46496
ENSMUSG00000021585	Cast	2.46406
ENSMUSG00000024286	Ccny	2.46195
ENSMUSG00000073406	H2-Bl	2.45873
ENSMUSG00000070923	Klhl9	2.45762
ENSMUSG00000047496	Rnf152	2.45699
ENSMUSG00000025920	Stau2	2.45692
ENSMUSG00000028399	Ptprd	2.45673
ENSMUSG00000026946	Nmi	2.45582
ENSMUSG00000038115	Ano2	2.45526
ENSMUSG00000040710	St8sia4	2.45305
ENSMUSG00000041135	Ripk2	2.45213
ENSMUSG00000021248	Tmed10	2.45134
ENSMUSG00000040570	Rundc3b	2.44614
ENSMUSG00000028226	Mmp16	2.44603
ENSMUSG00000074513	Arfip1	2.44519
ENSMUSG00000030064	Frmd4b	2.44336
ENSMUSG00000020037	Rfx4	2.44135
ENSMUSG00000040489	Sox30	2.43832
ENSMUSG00000044477	Zfand3	2.43487
ENSMUSG00000026494	Kif26b	2.4334
ENSMUSG00000071266	Zfp946	2.43278
ENSMUSG00000065968	Ifitm7	2.43161
ENSMUSG00000069712	4930444G20Rik	2.43071
ENSMUSG00000000037	Scml2	2.42885
ENSMUSG00000040938	Slc16a11	2.42757
ENSMUSG00000052151	Ppap2c	2.42586
ENSMUSG00000045410	Akr1e1	2.42528
ENSMUSG00000024044	Epb4.1l3	2.42255
ENSMUSG00000049411	6030446N20Rik	2.42159
ENSMUSG00000019876	Pkib	2.42119
ENSMUSG00000058631	Vmn1r63	2.41334
ENSMUSG00000047371	Zfp768	2.41172
ENSMUSG00000052751	Repin1	2.41091
ENSMUSG00000028289	Epha7	2.41054
ENSMUSG00000030516	Tjp1	2.40983
ENSMUSG00000032038	St3gal4	2.40912
ENSMUSG00000026637	Traf5	2.40543
ENSMUSG00000028389	Zfp37	2.403
ENSMUSG00000025724	Sec11a	2.4016
ENSMUSG00000072749	Gm10413	2.40037
ENSMUSG00000039530	Tusc3	2.3993
ENSMUSG00000020315	Spnb2	2.39917
ENSMUSG00000081218	Gm4297	2.39857
ENSMUSG00000030303	Far2	2.39832
ENSMUSG00000032076	Cadm1	2.39822
ENSMUSG00000052783	Grk4	2.39567
ENSMUSG00000032076	Cadm1	2.39454
ENSMUSG00000025959	Klf7	2.39357
ENSMUSG00000036334	Igsf10	2.3928
ENSMUSG00000045027	Prss22	2.39236
ENSMUSG00000028289	Epha7	2.39133
ENSMUSG00000021728	Emb	2.38933
ENSMUSG00000038059	2010002N04Rik	2.38683
ENSMUSG00000027763	Mbnl1	2.38643
ENSMUSG00000039478	Efha2	2.38613
ENSMUSG00000041000	Trim62	2.386
ENSMUSG00000026064	Ptp4a1	2.38519
ENSMUSG00000033885	Pxk	2.38385
ENSMUSG00000052751	Repin1	2.38365
ENSMUSG00000070691	Runx3	2.38319
ENSMUSG00000039747	Orai2	2.381
ENSMUSG00000020399	Havcr2	2.38085
ENSMUSG00000032076	Cadm1	2.3806
ENSMUSG00000028256	Odf2l	2.37884
ENSMUSG00000019769	Syne1	2.37814
ENSMUSG00000026649	1700009P17Rik	2.37688
ENSMUSG00000052751	Repin1	2.37603
ENSMUSG00000073724	Pramel4	2.3745
ENSMUSG00000032300	1700017B05Rik	2.37375
ENSMUSG00000071847	Apcdd1	2.37234
ENSMUSG00000029772	Ahcyl2	2.36978
ENSMUSG00000062929	Cfl2	2.36902
ENSMUSG00000002885	Cd97	2.3689
ENSMUSG00000044468	Fam46c	2.36851
ENSMUSG00000022744	Cldn25	2.36718
ENSMUSG00000021782	Dlg5	2.36515
ENSMUSG00000086040	Wipf3	2.36439
ENSMUSG00000037072	2012-09-15	2.36283
ENSMUSG00000002885	Cd97	2.3604
ENSMUSG00000026781	Acbd5	2.35931
ENSMUSG00000021782	Dlg5	2.35817
ENSMUSG00000069456	Rdh16	2.35488
ENSMUSG00000002885	Cd97	2.35477
ENSMUSG00000034109	Golim4	2.35419
ENSMUSG00000047187	Rab2a	2.35334
ENSMUSG00000029772	Ahcyl2	2.3532
ENSMUSG00000010592	Dazl	2.3529
ENSMUSG00000034573	Ptpn13	2.35132
ENSMUSG00000059263	Usp47	2.35041
ENSMUSG00000052751	Repin1	2.34929
ENSMUSG00000045394	Epcam	2.34832
ENSMUSG00000056900	Usp13	2.34831
ENSMUSG00000023927	Satb1	2.34799
ENSMUSG00000035472	Slc25a21	2.3467
ENSMUSG00000062116	Zfp954	2.34622
ENSMUSG00000025931	Paqr8	2.34585
ENSMUSG00000032076	Cadm1	2.3449
ENSMUSG00000059810	Rgs3	2.34266
ENSMUSG00000066442	Mthfs	2.34192
ENSMUSG00000068758	Il3ra	2.34088
ENSMUSG00000027495	2010011I20Rik	2.33956
ENSMUSG00000033420	Antxr1	2.33911
ENSMUSG00000054679	Srsf12	2.33573
ENSMUSG00000073723	Gm13102	2.33535
ENSMUSG00000001300	Efnb2	2.33467
ENSMUSG00000029534	St7	2.33384
ENSMUSG00000029534	St7	2.33349
ENSMUSG00000007817	Zmiz1	2.33168
ENSMUSG00000023927	Satb1	2.33151
ENSMUSG00000026781	Acbd5	2.32786
ENSMUSG00000008090	Fgfrl1	2.32777
ENSMUSG00000020814	Mxra7	2.32668
ENSMUSG00000035472	Slc25a21	2.32648
ENSMUSG00000052751	Repin1	2.3238
ENSMUSG00000023460	Rab12	2.3226
ENSMUSG00000073639	Rab18	2.31899
ENSMUSG00000024524	Gnal	2.31749
ENSMUSG00000025314	Ptprj	2.31733
ENSMUSG00000022518	4930562C15Rik	2.31682
ENSMUSG00000045174	Fam123c	2.31682
ENSMUSG00000052974	Cyp2f2	2.31534
ENSMUSG00000023927	Satb1	2.31504
ENSMUSG00000020953	Coch	2.31303
ENSMUSG00000039770	Ypel5	2.31259
ENSMUSG00000062995	Ica1	2.31254
ENSMUSG00000022342	Kcnv1	2.3124
ENSMUSG00000038541	Srd5a2	2.3124
ENSMUSG00000039296	Spdyb	2.3124
ENSMUSG00000042581	Thsd7b	2.3124
ENSMUSG00000053153	Spag16	2.3124
ENSMUSG00000060317	Acnat2	2.3124
ENSMUSG00000060530	A930017M01Rik	2.3124
ENSMUSG00000062209	Erbb4	2.3124
ENSMUSG00000072553	Gm525	2.3124
ENSMUSG00000027775	Mfsd1	2.31235
ENSMUSG00000030748	Il4ra	2.31219
ENSMUSG00000066191	Anks6	2.31208
ENSMUSG00000025920	Stau2	2.31207
ENSMUSG00000036067	Slc2a6	2.31184
ENSMUSG00000027719	Adad1	2.31151
ENSMUSG00000025889	Snca	2.31129
ENSMUSG00000022875	Kng1	2.31113
ENSMUSG00000035864	Syt1	2.31092
ENSMUSG00000046032	Snx12	2.3099
ENSMUSG00000050982	Apol10a	2.30798
ENSMUSG00000063681	Crb1	2.30798
ENSMUSG00000073070	4921506M07Rik	2.30798
ENSMUSG00000021738	Atxn7	2.30726
ENSMUSG00000020315	Spnb2	2.30549
ENSMUSG00000026781	Acbd5	2.30512
ENSMUSG00000086040	Wipf3	2.30366
ENSMUSG00000039671	Zmynd8	2.303
ENSMUSG00000057440	Mpp7	2.30251
ENSMUSG00000002617	Zfp40	2.30229
ENSMUSG00000021069	Pygl	2.29803
ENSMUSG00000047759	Hs3st3a1	2.2974
ENSMUSG00000032773	Chrm1	2.29006
ENSMUSG00000041408	Wapal	2.28987
ENSMUSG00000022292	Rrm2b	2.2893
ENSMUSG00000047749	Zc3hav1l	2.28874
ENSMUSG00000038298	Pdzk1	2.28832
ENSMUSG00000037990	Sh3rf3	2.28781
ENSMUSG00000028657	Ppt1	2.28767
ENSMUSG00000027534	Snx16	2.28697
ENSMUSG00000032368	Zic1	2.28637
ENSMUSG00000021476	Habp4	2.2846
ENSMUSG00000027199	Gatm	2.28133
ENSMUSG00000074738	B930041F14Rik	2.27983
ENSMUSG00000024588	Fech	2.27864
ENSMUSG00000074272	Ceacam1	2.27765
ENSMUSG00000027615	Hps3	2.27726
ENSMUSG00000002885	Cd97	2.27711
ENSMUSG00000026764	Kif5c	2.27698
ENSMUSG00000026781	Acbd5	2.27547
ENSMUSG00000021359	Tcfap2a	2.27542
ENSMUSG00000022329	Stk3	2.27326
ENSMUSG00000048027	Rgmb	2.27245
ENSMUSG00000066319	Rtp3	2.26985
ENSMUSG00000041915	Ammecr1l	2.26954
ENSMUSG00000070047	Fat1	2.26643
ENSMUSG00000024766	Lipo1	2.26421
ENSMUSG00000038298	Pdzk1	2.26309
ENSMUSG00000041479	Syt15	2.26035
ENSMUSG00000069662	Marcks	2.25963
ENSMUSG00000071252	2210408I21Rik	2.25881
ENSMUSG00000052544	St6galnac3	2.25877
ENSMUSG00000053004	Hrh1	2.25689
ENSMUSG00000057246	BC051142	2.25426
ENSMUSG00000049811	Fam161a	2.25392
ENSMUSG00000053965	Pde5a	2.25331
ENSMUSG00000033032	Afap1l1	2.25268
ENSMUSG00000018830	Myh11	2.25258
ENSMUSG00000048720	Tbc1d12	2.25257
ENSMUSG00000074194	Zfp791	2.25176
ENSMUSG00000078495	Gm13157	2.25152
ENSMUSG00000057246	BC051142	2.25094
ENSMUSG00000018899	Irf1	2.25065
ENSMUSG00000008429	Herpud2	2.24754
ENSMUSG00000048490	Nrip1	2.24718
ENSMUSG00000063275	Ptpla	2.24635
ENSMUSG00000026721	Rabgap1l	2.24601
ENSMUSG00000039106	Htr5a	2.24152
ENSMUSG00000027615	Hps3	2.24021
ENSMUSG00000019856	Fam184a	2.23967
ENSMUSG00000043673	Kcns3	2.23923
ENSMUSG00000057531	Dtnbp1	2.23822
ENSMUSG00000027534	Snx16	2.23808
ENSMUSG00000051029	Serpinb1b	2.23765
ENSMUSG00000031734	Irx3	2.2374
ENSMUSG00000033885	Pxk	2.23569
ENSMUSG00000052062	Pard3b	2.23542
ENSMUSG00000041440	Gk5	2.23444
ENSMUSG00000024524	Gnal	2.23139
ENSMUSG00000026586	Prrx1	2.2296
ENSMUSG00000018899	Irf1	2.22891
ENSMUSG00000019846	Lama4	2.22886
ENSMUSG00000041930	BC057022	2.2286
ENSMUSG00000020034	Tcp11l2	2.22731
ENSMUSG00000030465	Psd3	2.22653
ENSMUSG00000022686	B3gnt5	2.2258
ENSMUSG00000034101	Ctnnd1	2.22547
ENSMUSG00000047434	AI480653	2.22067
ENSMUSG00000063275	Ptpla	2.22018
ENSMUSG00000025085	Ablim1	2.21976
ENSMUSG00000034303	Ccdc15	2.21955
ENSMUSG00000025085	Ablim1	2.21768
ENSMUSG00000024232	Bambi	2.21699
ENSMUSG00000034484	Snx2	2.21636
ENSMUSG00000022305	Lrp12	2.21596
ENSMUSG00000052942	Glis3	2.21583
ENSMUSG00000028402	Mpdz	2.21528
ENSMUSG00000037386	Rims2	2.21297
ENSMUSG00000022686	B3gnt5	2.21121
ENSMUSG00000070639	Lrrc8b	2.21111
ENSMUSG00000018899	Irf1	2.21098
ENSMUSG00000008090	Fgfrl1	2.21073
ENSMUSG00000054863	Fam19a5	2.2094
ENSMUSG00000044165	Bcl2l15	2.20887
ENSMUSG00000051185	Fam174a	2.20856
ENSMUSG00000029168	Dpysl5	2.20844
ENSMUSG00000055639	Dach1	2.20799
ENSMUSG00000033676	Gabrb3	2.20781
ENSMUSG00000025370	Cdh9	2.20769
ENSMUSG00000029546	Uncx	2.20744
ENSMUSG00000071716	Apol7e	2.20593
ENSMUSG00000021700	Rab3c	2.20531
ENSMUSG00000028583	Pdpn	2.20395
ENSMUSG00000019256	Ahr	2.2024
ENSMUSG00000024290	Rock1	2.20164
ENSMUSG00000045912	C2cd4c	2.20111
ENSMUSG00000019802	Sec63	2.20097
ENSMUSG00000021758	Ddx4	2.20079
ENSMUSG00000022404	Slc25a17	2.19987
ENSMUSG00000046573	Lyrm4	2.19913
ENSMUSG00000017204	Gsdma	2.19908
ENSMUSG00000058258	Idi1	2.19901
ENSMUSG00000034101	Ctnnd1	2.19852
ENSMUSG00000034101	Ctnnd1	2.1985
ENSMUSG00000038463	Olfml2b	2.19656
ENSMUSG00000023927	Satb1	2.19629
ENSMUSG00000028032	Papss1	2.19529
ENSMUSG00000089726	Mir17hg	2.19432
ENSMUSG00000022686	B3gnt5	2.193
ENSMUSG00000034101	Ctnnd1	2.19228
ENSMUSG00000034101	Ctnnd1	2.19191
ENSMUSG00000028458	Tesk1	2.19097
ENSMUSG00000021217	Tshz3	2.19048
ENSMUSG00000074272	Ceacam1	2.1897
ENSMUSG00000024712	Rfk	2.18913
ENSMUSG00000041309	Nkx6-2	2.1872
ENSMUSG00000020458	Rtn4	2.18533
ENSMUSG00000022812	Gsk3b	2.18527
ENSMUSG00000058186	Gm13242	2.18506
ENSMUSG00000019923	Zwint	2.18466
ENSMUSG00000025795	Rassf3	2.18119
ENSMUSG00000035183	Slc24a5	2.18047
ENSMUSG00000006288	Ttc5	2.18016
ENSMUSG00000040710	St8sia4	2.1797
ENSMUSG00000020052	Ascl1	2.17941
ENSMUSG00000046312	AI464131	2.17927
ENSMUSG00000005533	Igf1r	2.17872
ENSMUSG00000041216	Clvs1	2.17791
ENSMUSG00000022498	Txndc11	2.17775
ENSMUSG00000060244	Refbp2	2.17728
ENSMUSG00000054087	Fbxw14	2.17607
ENSMUSG00000028573	Fggy	2.1759
ENSMUSG00000036275	9530068E07Rik	2.17503
ENSMUSG00000024639	Gnaq	2.17372
ENSMUSG00000009733	Tcfcp2	2.17284
ENSMUSG00000078236	Pou3f1	2.17234
ENSMUSG00000043542	Fam164a	2.17143
ENSMUSG00000028563	Tm2d1	2.17143
ENSMUSG00000037664	Cdkn1c	2.17109
ENSMUSG00000089704	Galnt2	2.16967
ENSMUSG00000047996	Prrg1	2.16953
[truncated: 4,083 more rows]
